# Supplementary material for: Measuring patient-centred system performance: a scoping review of patient-centred care quality indicators
Source: PubMed Central journal article supplement — BMJ Open. 2019 Jan 7;9(1):e023596. doi: 10.1136/bmjopen-2018-023596 (PMC6326310; doi:10.1136/bmjopen-2018-023596), 2019-01-07
Supplement: bmjopen-2018-023596.draft_revisions.pdf [file bmjopen-2018-023596.draft_revisions.pdf]

# BMJ Open

BMJ Open is committed to open peer review. As part of this commitment we make the peer review history of every article we publish publicly available.

When an article is published we post the peer reviewers' comments and the authors' responses online. We also post the versions of the paper that were used during peer review. These are the versions that the peer review comments apply to.

The versions of the paper that follow are the versions that were submitted during the peer review process. They are not the versions of record or the final published versions. They should not be cited or distributed as the published version of this manuscript.

BMJ Open is an open access journal and the full, final, typeset and author-corrected version of record of the manuscript is available on our site with no access controls, subscription charges or pay-per-view fees (<http://bmjopen.bmj.com>).

If you have any questions on BMJ Open's open peer review process please email [info.bmjopen@bmj.com](mailto:info.bmjopen@bmj.com)

# BMJ Open

## Measuring patient-centred system performance: A scoping review of patient-centred care quality indicators

|                               |                                                                                                                                                                                                                                                                                                                                                                                                                                                                                                                                                                                                                     |
|-------------------------------|---------------------------------------------------------------------------------------------------------------------------------------------------------------------------------------------------------------------------------------------------------------------------------------------------------------------------------------------------------------------------------------------------------------------------------------------------------------------------------------------------------------------------------------------------------------------------------------------------------------------|
| Journal:                      | <i>BMJ Open</i>                                                                                                                                                                                                                                                                                                                                                                                                                                                                                                                                                                                                     |
| Manuscript ID                 | bmjopen-2018-023596                                                                                                                                                                                                                                                                                                                                                                                                                                                                                                                                                                                                 |
| Article Type:                 | Research                                                                                                                                                                                                                                                                                                                                                                                                                                                                                                                                                                                                            |
| Date Submitted by the Author: | 13-Apr-2018                                                                                                                                                                                                                                                                                                                                                                                                                                                                                                                                                                                                         |
| Complete List of Authors:     | Santana, Maria-Jose; University of Calgary, Community Health Sciences; University of Calgary Cumming School of Medicine, Pediatrics<br>Ahmed, Sadia; University of Calgary Cumming School of Medicine, Pediatrics<br>Lorenzetti, Diane; University of Calgary, Community Health Sciences<br>Jolley, Rachel; University of Calgary, Community Health Sciences<br>Manalili, Kimberly; University of Calgary, Community Health Sciences<br>Zelinsky, Sandra; University of Calgary, PaCER Innovates<br>Quan, Hude; University of Calgary, Community Health Sciences<br>Lu, Mingshan ; University of Calgary, Economics |
| Keywords:                     | Patient-centred care, Quality indicators, healthcare quality, quality improvement                                                                                                                                                                                                                                                                                                                                                                                                                                                                                                                                   |
|                               |                                                                                                                                                                                                                                                                                                                                                                                                                                                                                                                                                                                                                     |

SCHOLARONE™  
Manuscripts

## Measuring patient-centred system performance: A scoping review of patient-centred care quality indicators

Maria J Santana,<sup>1,2\*</sup> Sadia Ahmed,<sup>2</sup> Diane L Lorenzetti,<sup>1,3</sup> Rachel J Jolley,<sup>1</sup> Kimberly Manalili,<sup>1</sup> Sandra Zelinsky,<sup>1</sup> Hude Quan,<sup>1</sup> Mingshan Lu<sup>1,4</sup>

<sup>1</sup> Department of Community Health Sciences, University of Calgary, Calgary, Alberta, Canada

<sup>2</sup> Department of Pediatrics, Cumming School of Medicine, University of Calgary, Canada

<sup>3</sup> Health Sciences Library, University of Calgary, Calgary, Alberta, Canada

<sup>4</sup> Department of Economics, University of Calgary, Calgary, Alberta, Canada

Maria J Santana, Assistant Professor

Sadia Ahmed, Research Assistant

Diane L Lorenzetti, Research Librarian

Rachel J Jolley, Research Associate

Kimberly Manalili, Research Associate

Sandra Zelinsky, Patient Research Partner

Hude Quan, Professor

Mingshan Lu, Professor

### \* Corresponding author:

**Maria J. Santana, PhD**

Email: [mjsantan@ucalgary.ca](mailto:mjsantan@ucalgary.ca)

Department of Pediatrics

Department of Community Health Sciences

Cumming School of Medicine, University of Calgary

TRW Building, 3rd Floor

3280 Hospital Drive NW

Calgary, Alberta CANADA T2N 4Z6

Phone: (403) 955-2783

Word Count: 2,659

Number of references: 45

Number of Figures: 1

Number of Tables: 4

## Abstract

**Objectives:** The shift to the patient-centred care model as a healthcare delivery paradigm, calls for systematic measurement and evaluation. In an attempt to develop patient-centred quality indicators (PC-QIs), we embarked on this study with the aim to identify quality indicators that can be used to measure patient-centred care. The objective of this scoping review was to identify existing PC-QIs that have been developed and implemented across various care sectors.

**Search Strategy:** Studies were identified through searching seven electronic databases and the grey literature. Search terms included: quality improvement, quality indicators, healthcare quality, patient-centred care. Articles were included if they mentioned development and/or implementation of PC-QIs.

**Results:** This review revealed the heterogeneity describing and defining the nature of PC-QIs. While PC-QIs, defined by Agency for Healthcare Research and Quality (AHRQ) are a quantifiable unit of measurement of the performance of the healthcare system, most PC-QIs were presented as patient-centred care (PCC) measures and identified as guidelines, surveys, or recommendations. Our search yielded 502 proposed ways to measure PCC, only 25 of which were actual PC-QIs. An example of a PC-QI identified was “percent of hospital patients who said they had been sufficiently involved in decisions about their care as much as they wanted to be”.

**Conclusion:** There is a lack of evaluation and implementation of PC-QIs in the literature. The identification of PC-QIs is a key first step in laying the groundwork to develop evidence-based PC-QIs. Research is needed to continue the development and implementation of PC-QIs for healthcare quality improvement.

**Keywords:** patient-centred care, quality indicator, healthcare quality, quality improvement

**What is already known on this subject:**

There has been a shift in delivery of healthcare to a patient-centred care model. Measurement of patient-centred care is necessary to improve the quality of care

**What this study adds:**

From our scope of the literature, we identified quality indicators and measures to inform the development of evidence-based patient-centred quality indicators.

**Strengths**

- Transparent and rigorous search strategy
- Involvement of our patient partner in the study
- Study informed by a previously published protocol<sup>9</sup>

**Limitations**

- Search strategy using only English terms
- We did not assess the quality of the measures and/or indicators identified

## INTRODUCTION

Patient-centred care (PCC) is an approach that has become central to policies and programming to improve healthcare inefficiencies and address patient safety issues.<sup>1</sup> PCC is one of the six dimensions of healthcare and was formally described by the Institute of Medicine in 2001 as “*healthcare that respects and responds to the preferences, needs and values of the individual patients throughout all healthcare decisions*”.<sup>2</sup> PCC is a model in which healthcare providers are encouraged to partner with patients and families to design and deliver individualized care. PCC models have been linked to positive patient experiences and improved outcomes, such as increased adherence to care and treatment.<sup>3-5</sup>

The adoption of a PCC model requires first, the identification of appropriate indicators to measure the quality of PCC, and second, the assessment of the impact of delivering PCC on healthcare system and patient outcomes. Quality indicators are a key mechanism for measuring system performance and healthcare quality, and demonstrating the extent to which improvement efforts have led to desirable change, or contributed to unintended results.<sup>6</sup> As identified from the Agency for Healthcare Research and Quality (AHRQ), a quality indicator consists of: a specific aspect of quality being captured, and a method for how concepts of quality are captured (which includes: data source, measure type, observable event, specification and risk adjustment).<sup>7</sup> While various quality indicators have been developed to measure healthcare safety, effectiveness and access,<sup>8</sup> they typically do not incorporate the priorities and experiences of patients and family caregivers. To truly evaluate the impact of patient-centredness, indicators must reflect the patient and family caregiver perspective.

This scoping review aimed to synthesize existing literature on quality indicators used in the evaluation of patient-centred care. The search was guided by the questions: “How is patient-centred care measured?” “Is this a patient-centred quality indicator?” and “Have existing patient-centred quality indicators been implemented and evaluated across various points-of-care settings, processes of care, and at the systems level to measure patient-centred care?” The information gained from this study will inform the development of patient-centred care quality indicators that could be implemented to drive healthcare improvement valued by patients and families.

## METHODS

We employed a scoping review protocol that was previously published,<sup>9</sup> using methodology based on Arksey and O’Malley’s scoping review framework<sup>10</sup> and Levac *et al.*’s methodological enhancement.<sup>11</sup> We searched the peer-reviewed published and grey literature for either proposed or existing quality indicators that have been developed and/or implemented across various points-of-care settings to measure patient-centred care. For this scoping review, the Agency for Healthcare Research & Quality (AHRQ)<sup>12</sup> definition of a quality indicator was adapted to incorporate a patient and family focus. Specifically, a patient-centred quality indicator (PC-QI) was defined as *a unit of measurement of the performance of the healthcare system, which reflects what matters to*

1  
2  
3 *patients and families, and to any individual that is in contact with healthcare services.* In  
4 contrast, PCC measures inform the development of indicators to measure patient-centred  
5 care, and are often in the form of a survey, guideline, or recommendation.  
6  
7

### 8 9 **Data sources and search strategy**

10 In order to identify studies assessing quality indicators for patient-centred care, search  
11 strategies were developed that combined terms from two concepts: patient-centred care  
12 and quality indicators (supplemental file 1). The Cochrane Library, the Cumulative Index  
13 to Nursing and Allied Health Literature (CINAHL), EMBASE, MEDLINE, PsycINFO,  
14 Social Services Abstracts, and Social Work Abstracts were searched from inception to  
15 May 2017. A search of the Google search engines, and the websites of relevant quality  
16 improvement and patient-centric organizations enabled the identification of relevant grey  
17 literature. Grey literature searches were conducted in duplicate by both a researcher and  
18 patient partner. The reference lists of included studies were also scanned to identify any  
19 other studies of relevance.  
20  
21  
22  
23

### 24 25 **Citation management**

26  
27 All references were imported into a custom-written Java software application, Synthesis  
28 for reference management and data collection.<sup>13</sup> Duplicate citations were removed  
29 automatically by the software, with any mismatched duplicates removed manually if  
30 detected.  
31  
32

### 33 34 **Study selection and data abstraction**

35 To be eligible for inclusion, the study/article had to 1) identify quality indicators for PCC  
36 and/or 2) identify PC-QI in performance measurement (e.g., validation). The title and  
37 abstract of each citation identified was screened for eligibility independently by two  
38 reviewers (MJS, ML). The full-text of any abstract selected by either reviewer was  
39 retrieved and assessed for eligibility. Any full-text articles for which there was inter-rater  
40 discord were reviewed a second time, and final disagreements about study eligibility  
41 were resolved through discussion.  
42  
43

### 44 45 **Data collection and Classification of Indicators**

46 A data collection tool was developed and tested on a sample of papers to determine its  
47 practicality prior to the full review (supplemental file 2). Extracted data included study  
48 characteristics (country, year of publication, type of study/article), patients' inclusion in  
49 the development of indicators, and type of patient populations and point of care if  
50 applicable (e.g. in-patient, out-patient, primary care).  
51  
52

53 All extracted indicators were classified according to a person-centred care framework<sup>14</sup>  
54 developed by the team and guided by the Donabedian model of quality of care.<sup>15</sup> This  
55 framework provides a roadmap for healthcare systems to implement and measure PCC at  
56  
57  
58  
59

the level of structure (the health care system/organizational level); process (the patient-healthcare provider interaction level), and outcome (the patient-health care provider, healthcare systems interaction level).<sup>14</sup>

## RESULTS

A total of 36,643 citations were retrieved, and upon duplicate removal, a total of 16,173 citations were reviewed at the title and abstract stage for inclusion (Figure 1). A total 184 full-text peer-reviewed articles were assessed for eligibility for inclusion; of these, nine articles were included in this review (Figure 1). From the non-peer-reviewed literature, following the title and document review, eight documents met the criteria for inclusion in this study (Figure 1). The most common reason for excluding articles (n=15,905) was the absence of indicators for PCC.

### Article Description

Table 1 presents the characteristics of the full text articles included in the study. The years of publication ranged from 1996 to 2015. Included studies were published in Belgium (n=1), United States of America (n=2), Canada (n=3), United Kingdom (n=4), the Netherlands (n=4), and three sources did not include a country of publication. Sources were varied and included original peer reviewed research (n=8), guest editorial (n=1), reports (n=4), discussion paper (n=1), working paper (n=1), literature review (n=1), and a website (n=1). The study populations varied in the peer reviewed literature (e.g., cancer, fertility care, HPN, etc.) and no specific populations were identified in the non-peer reviewed literature.

Table 1. Characteristics of Articles on Patient-Centred Quality Indicators

| Study identifier (first author)       | Country     | Year | Study Type                                          | Population                               | Patients involved | Number of Indicators & ways to measure PCC |
|---------------------------------------|-------------|------|-----------------------------------------------------|------------------------------------------|-------------------|--------------------------------------------|
| <b>Peer reviewed literature (n=9)</b> |             |      |                                                     |                                          |                   |                                            |
| den Breejen et al. <sup>38</sup>      | Netherlands | 2013 | Focus groups/interviews/consensus meetings          | Fertility care                           | Yes               | 34                                         |
| Dreesen et al. <sup>25</sup>          | Belgium     | 2014 | Focus groups/interviews/consensus meetings;         | Home parenteral nutrition (HPN) patients | Yes               | 33                                         |
| Ouwens et al. <sup>26</sup>           | Netherlands | 2010 | Focus groups/interviews/consensus meetings;         | Cancer- Non-small cell lung carcinoma    | Yes               | 54                                         |
| Sewitch et al. <sup>39</sup>          | Canada      | 2013 | Focus groups/interviews/consensus meetings; Surveys | Colonoscopy patients - adult             | Yes               | 20                                         |



|                                                                                         |                |      |                                                     |                                                                                                                                                   |     |     |
|-----------------------------------------------------------------------------------------|----------------|------|-----------------------------------------------------|---------------------------------------------------------------------------------------------------------------------------------------------------|-----|-----|
| Uphoff et al. <sup>27</sup>                                                             | Netherlands    | 2012 | Focus groups/interviews/consensus meetings          | Cancer                                                                                                                                            | Yes | 21  |
| Wensing et al. <sup>16</sup>                                                            | Netherlands    | 1996 | Focus groups/interviews/consensus meetings; Surveys | Chronically ill patients (chronic obstructive pulmonary disease, diabetes, cardiovascular disease, migraine, chronic disease of locomotor system) | Yes | 41  |
| Zimmerman et al. <sup>28</sup>                                                          | USA            | 2014 | Focus groups/interviews/consensus meetings          | Community-based, assisted living support patients                                                                                                 | Yes | 43  |
| Cox et al. <sup>40</sup>                                                                | United Kingdom | 2014 | Guest editorial                                     | -                                                                                                                                                 | -   | 4   |
| Carinci et al. <sup>24</sup>                                                            | United Kingdom | 2015 | Modified Delphi approach/consensus meeting          | -                                                                                                                                                 | -   | 12  |
| <b>non-peer reviewed Literature (n=8)</b>                                               |                |      |                                                     |                                                                                                                                                   |     |     |
| Steven Lewis <sup>22</sup>                                                              | Canada         | 2009 | Discussion paper                                    | -                                                                                                                                                 | -   | 6   |
| RNAO <sup>21</sup>                                                                      | Canada         | 2002 | Guidelines document/report                          | -                                                                                                                                                 | -   | 18  |
| Silow-Carroll et al. <sup>41</sup>                                                      | USA            | 2006 | Report                                              | -                                                                                                                                                 | -   | 6   |
| Kelley & Hurst (OECD) <sup>20</sup>                                                     | -              | 2006 | Working papers                                      | -                                                                                                                                                 | Yes | 7   |
| OECD <sup>23</sup>                                                                      | -              | 2006 | OECD website                                        | -                                                                                                                                                 | Yes | 8   |
| Essence of Care- Patient Focused benchmarks for clinical governance (NHS) <sup>18</sup> | United Kingdom | 2003 | Report                                              | -                                                                                                                                                 | Yes | 116 |
| Davies et al. <sup>19</sup>                                                             | United Kingdom | 2009 | Report                                              | -                                                                                                                                                 | -   | 10  |
| IAPO <sup>17</sup>                                                                      | -              | 2012 | Literature review                                   | -                                                                                                                                                 | -   | 69  |

PCC, Patient-Centred Care; OECD, Organization for Economic Co-operation and Development; NHS, National Health Services; RNAO, Registered Nurses Association Ontario; IAPO, International Alliance of Patients' Organizations

## How is patient-centred care measured?

From the sources included, a total of 502 ways of measuring PCC were identified, of which 25 identified were actual indicators. PCC measurement varied between articles.

Most sources presented the measurement as guidelines or recommendations for healthcare practitioners. Wensing *et al.* presented indicators as questions similar to items in a survey, such as “Does the GP pay attention to patients' needs?”<sup>16</sup> Actual indicators were presented as percentages and proportions, and identified from six grey literature sources.<sup>17-22</sup> For instance, one study outlined an example of a structure indicator - “Percent of nurses attending education sessions (orientation, organization professional development opportunities) on client centred care.”<sup>21</sup>

Study populations included cancer patients (n=2), colonoscopy patients (n=1), home parenteral nutrition patients (HPN) (n=1), chronically ill (n=1), fertility care (n=1), and assisted living support patients (n=1) (Table 1). For the development of PCC measures, seven studies used focus groups, interviews, and/or consensus meetings, ten studies included patients and family caregivers in the development of PCC measures, and one article developed measures through the authors' clinical and research work. Two sources developed ways to measure PCC from patient reported experience surveys,<sup>20 23</sup> and two studies used a framework.<sup>21 24</sup>

Some studies grouped ways to measure PCC according to domains of patient-centred care that were based on previously defined frameworks or through consensus (e.g., access to care, communication and information). We classified actual indicators and other ways of measuring PCC according to the person-centred care framework.<sup>14</sup> Domains identified from the person-centred care framework are categorized according to structure, process, and outcome.<sup>14</sup> Table 2 presents examples of measuring PCC classified according to the person-centred care framework,<sup>14</sup> and Table 3 presents the actual indicators classified according to the same framework.<sup>14</sup>

Table 2. Examples of PCC measurement classified according to the person-centred care framework.<sup>14</sup>

| PCC Measure Classification | Domain                                                         | Example of ways to measure PCC                                                                                                                                                                                                                                                                                                                                                                                                                                                                                                                 |
|----------------------------|----------------------------------------------------------------|------------------------------------------------------------------------------------------------------------------------------------------------------------------------------------------------------------------------------------------------------------------------------------------------------------------------------------------------------------------------------------------------------------------------------------------------------------------------------------------------------------------------------------------------|
| Structure (n=80)           | Supporting a workforce committed to Patient-Centred Care (PCC) | <ul style="list-style-type: none"> <li>The development needs of health care personnel are met by ongoing review through supervision, appraisal and individual development plans<sup>18</sup></li> <li>Percent of nurses attending education sessions (orientation, organization professional development opportunities) on client centred care<sup>21</sup>.</li> <li>All staff and volunteers can articulate person-centred principles and practices applicable to their role(s) and demonstrate their implementation<sup>28</sup></li> </ul> |
|                            | Providing a supportive and accommodating PCC environment       | <ul style="list-style-type: none"> <li>Residents have a choice of a private room<sup>28</sup></li> <li>Patient satisfaction survey translated into Spanish<sup>40</sup></li> </ul>                                                                                                                                                                                                                                                                                                                                                             |
| Process (n=343)            | Cultivating Communication                                      | <ul style="list-style-type: none"> <li>(Regular) doctor involving patients in decisions about care or treatment<sup>23</sup></li> </ul>                                                                                                                                                                                                                                                                                                                                                                                                        |

|                |                                   |                                                                                                                                                                                                                                                                                                                                                                                                            |
|----------------|-----------------------------------|------------------------------------------------------------------------------------------------------------------------------------------------------------------------------------------------------------------------------------------------------------------------------------------------------------------------------------------------------------------------------------------------------------|
|                |                                   | <ul style="list-style-type: none"> <li>• Making use of open-ended questions in a conversation with the patient<sup>27</sup></li> <li>• Patient had the knowledge and support to make decisions<sup>26</sup></li> <li>• Regular doctor providing easy-to-understand explanations<sup>24</sup></li> </ul>                                                                                                    |
|                | Respectful and compassionate care | <ul style="list-style-type: none"> <li>• Patient received emotional support from nurses if needed<sup>26</sup></li> <li>• Giving confidence to the patient<sup>25</sup></li> <li>• Does the GP pay attention to patients' needs?<sup>16</sup></li> </ul>                                                                                                                                                   |
| Outcome (n=79) | Patient-Reported Outcomes (PROs)  | <ul style="list-style-type: none"> <li>• Measures are in place to assess and provide feedback on the interpersonal skills of health care personnel<sup>18</sup></li> <li>• Does patients' health improve or stabilise?<sup>16</sup></li> <li>• Regarding infertility treatment, patients would like to see all members of the infertility treatment team following the same policy<sup>37</sup></li> </ul> |

Table 3. Patient Centred Care Indicators classified according to the person-centered care framework<sup>14</sup>

| Type of Indicator | Domain                                  | PCC Indicators (n=25)                                                                                                                                                                                                                                                                                                                                                                                                         |
|-------------------|-----------------------------------------|-------------------------------------------------------------------------------------------------------------------------------------------------------------------------------------------------------------------------------------------------------------------------------------------------------------------------------------------------------------------------------------------------------------------------------|
| Structure         | Creating a PCC Culture                  | <ul style="list-style-type: none"> <li>• An induction programme is in place which promotes the philosophy of care<sup>18</sup></li> <li>• % of PHC organizations who currently have processes to involve community input for planning the organization's services (e.g. advisory committees, focus groups<sup>17</sup></li> <li>• Clear policies are in place on how services are offered to patients<sup>17</sup></li> </ul> |
|                   | Supporting a workforce committed to PCC | <ul style="list-style-type: none"> <li>• Percent of nurses attending education sessions (orientation, organization professional development opportunities) on client centred care<sup>21</sup></li> <li>• Percent of non-nursing staff attending education sessions (orientation, organization professional development opportunities) on client centred care<sup>15</sup></li> </ul>                                         |
| Process           | Cultivating Communication               | <ul style="list-style-type: none"> <li>• % of patients with access to an on-line HER a) By region b) By practice<sup>22</sup></li> <li>• Proportion of service users who stated that the district nurse provided health advice or information about his/her condition<sup>19</sup></li> <li>• Proportion of service users who stated that they</li> </ul>                                                                     |

|         |                                          |                                                                                                                                                                                                                                                                                                                                                                                                                                                                                                                                                                                                                                                                                                                                                                                                                                                                                                                                                                  |
|---------|------------------------------------------|------------------------------------------------------------------------------------------------------------------------------------------------------------------------------------------------------------------------------------------------------------------------------------------------------------------------------------------------------------------------------------------------------------------------------------------------------------------------------------------------------------------------------------------------------------------------------------------------------------------------------------------------------------------------------------------------------------------------------------------------------------------------------------------------------------------------------------------------------------------------------------------------------------------------------------------------------------------|
|         |                                          | were involved as much as they wanted to be in decisions about their care and treatment <sup>19</sup>                                                                                                                                                                                                                                                                                                                                                                                                                                                                                                                                                                                                                                                                                                                                                                                                                                                             |
|         | Respectful and compassionate care        | <ul style="list-style-type: none"> <li>• Proportion of service users who stated that their district nurse treated them with respect and dignity<sup>19</sup></li> <li>• % of inpatients who said they were always treated with respect and dignity while in hospital/primary care<sup>17</sup></li> </ul>                                                                                                                                                                                                                                                                                                                                                                                                                                                                                                                                                                                                                                                        |
|         | Engaging patients in managing their care | <ul style="list-style-type: none"> <li>• % of PHC clients/patients, 18 years and over, with a chronic condition(s), who actively participated in the development of a treatment plan with their PHC provider over the past 12 months<sup>17</sup></li> <li>• % of hospital patients who said they had been sufficiently involved in decisions about their care as much as they wanted to be<sup>17</sup></li> <li>• Percent of nurses self-reporting: Adequate assessment of a client's perceived needs for care, adequate assessment of a client's goals for care, adequate documentation of a client's personal goals for care, sharing client's concerns/choices with other members of the health care team, discharge teaching guided by the client's goals for managing their care at home<sup>21</sup></li> </ul>                                                                                                                                          |
|         | Integration of Care                      | <ul style="list-style-type: none"> <li>• % of hospital patients taking medicines home after discharge who were told completely about the purposes of the medicine in a way they could understand<sup>17</sup></li> </ul>                                                                                                                                                                                                                                                                                                                                                                                                                                                                                                                                                                                                                                                                                                                                         |
| Outcome | Access to Care                           | <ul style="list-style-type: none"> <li>• % of patients who can get all diagnostic work ordered by their primary care doctor done the same day in the same location (excluding certain high-technology procedures such as CT and MRI)<sup>22</sup></li> <li>• Percentage of outpatients seen within 13 weeks of GP referral<sup>20</sup></li> <li>• Percentage of those on waiting list waiting 12 months or more<sup>20</sup></li> <li>• Proportion of service users who were able to contact a district nurse when needed, including outside of normal working hours<sup>19</sup></li> <li>• The percentage of patients who, in the appropriate national survey, indicate that they were able to obtain a consultation with a GP or appropriate health care professional within 2 working days (NHS Confederation, UK)<sup>17</sup></li> <li>• % of PHC clients/patients, 18 years and over, with a chronic condition(s), who had sufficient time in</li> </ul> |

|  |                                      |                                                                                                                                                                                                                                                                                                                                                                                                                                                                                                                                                                                                                                                                                                                                                                        |
|--|--------------------------------------|------------------------------------------------------------------------------------------------------------------------------------------------------------------------------------------------------------------------------------------------------------------------------------------------------------------------------------------------------------------------------------------------------------------------------------------------------------------------------------------------------------------------------------------------------------------------------------------------------------------------------------------------------------------------------------------------------------------------------------------------------------------------|
|  |                                      | most visits to confide their health-related feelings, fears and concerns to their PHC provider <sup>17</sup>                                                                                                                                                                                                                                                                                                                                                                                                                                                                                                                                                                                                                                                           |
|  | Patient-Reported Experiences (PREMs) | <ul style="list-style-type: none"> <li>• Proportion of service users who stated that the district nurse had all the necessary information about the service user and his/ her health needs<sup>19</sup></li> <li>• Proportion of service users who stated that the district nurse had all the equipment and dressings needed<sup>19</sup></li> <li>• Proportion of service users who stated that the district nurse was knowledgeable and competent<sup>19</sup></li> <li>• Proportion of service users who rated the district nurse service as very good or excellent<sup>19</sup></li> <li>• Proportion of children whose parents routinely received all aspects of family centred care (Child and Adolescent Health Measurement Initiative)<sup>17</sup></li> </ul> |

PHC, Primary Healthcare; HER, Health Electronic Record; CT, Computed Tomography; MRI, Magnetic Resonance Imaging; GP, General Practitioner; NHS, National Health Services; UK, United Kingdom

### Is this a patient-centred quality indicator?

The definition of a PC-QI was not clearly articulated in the studies identified (Table 4). Ten of the included studies provided no such definition of a quality indicator (Table 4). Sources where the definition of a quality indicator was mentioned defined indicators as something to be measured, and developed through consensus (Table 4).<sup>19 25-27</sup> Of those four sources where the definition of a PC-QI was clear, two included actual indicators.<sup>17</sup> <sup>19</sup> The National Health Services (2003) report described indicators as ‘items that patients, carers and professionals believed were important in achieving the benchmarks of best practice.’<sup>18</sup>

Table 4. Definition of quality indicator used by authors

| Study Identifier (First Author, year)                                                                                                                                                                                                                                                                                                                                                                                                                               | Definition of quality indicator used                                                                                                                                                                              |
|---------------------------------------------------------------------------------------------------------------------------------------------------------------------------------------------------------------------------------------------------------------------------------------------------------------------------------------------------------------------------------------------------------------------------------------------------------------------|-------------------------------------------------------------------------------------------------------------------------------------------------------------------------------------------------------------------|
| (den Breejen <i>et al</i> , 2013), <sup>38</sup> (Sewitch <i>et al</i> , 2013), <sup>39</sup> (Uphoff <i>et al</i> , 2012), <sup>27</sup> (Zimmerman <i>et al</i> , 2014), <sup>28</sup> (Cox <i>et al</i> , 2014), <sup>40</sup> (Lewis, 2009), <sup>22</sup> (RNAO, 2002), <sup>21</sup> (Silow-Carroll <i>et al</i> , 2006), <sup>41</sup> (Kelley & Hurst, 2006), <sup>20</sup> (OECD website, 2006), <sup>23</sup> (Carinci <i>et al</i> , 2015) <sup>24</sup> | Definition not included                                                                                                                                                                                           |
| (Dreesen <i>et al</i> , 2014) <sup>25</sup>                                                                                                                                                                                                                                                                                                                                                                                                                         | A quality indicator as a measurable element of practice performance for which there is evidence or consensus that it can be used to assess the quality of care, and hence change the care provided. <sup>42</sup> |
| (Ouwens <i>et al</i> , 2010) <sup>26</sup> (Uphoff <i>et al</i> , 2012) <sup>27</sup>                                                                                                                                                                                                                                                                                                                                                                               | Quality indicators are ‘measurable elements of practice performance for which there is evidence or consensus that they can be used to assess the quality of care’ <sup>43</sup>                                   |
| (Davies <i>et al</i> , 2009) <sup>19</sup>                                                                                                                                                                                                                                                                                                                                                                                                                          | An explicit measurable statement of the                                                                                                                                                                           |

|                            |                                                                                                                                                                                                                            |
|----------------------------|----------------------------------------------------------------------------------------------------------------------------------------------------------------------------------------------------------------------------|
|                            | quality of care given. Relates to a single outcome or process of medical care. Clearly defined and unambiguous. <sup>43 44</sup>                                                                                           |
| (NHS, 2003) <sup>18</sup>  | Items that patients, carers and professionals believed were important in achieving the benchmarks of best practice. <sup>18</sup>                                                                                          |
| (IAPO, 2012) <sup>17</sup> | Can be measures of structure, process and outcome, either as generic measures relevant for all diseases, or disease-specific measures that describe quality of patient care related to a specific diagnosis. <sup>45</sup> |

OECD, Organization for Economic Cooperation and Development; NHS, National Health Services; IAPO, International Alliance of Patients' Organizations

Have the existing patient-centred quality indicators been implemented and evaluated across various points-of-care settings, processes of care and at the system level to measure patient-centred care?

None of the articles mentioned actual implementation of indicators in the settings for which they were developed. Similarly, many of the sources did not evaluate the indicators according to any set criteria. The study by Ouwens *et al.* assessed guidelines for psychometric characteristics and only 26 out of 56 guidelines were found to be reliable.<sup>26</sup> The study by Carinci *et al.* used a modified Delphi approach with expert Organization for Economic Co-operation and Development (OECD) members to rate the PCC measures, using validity, reliability, relevance, actionability, international feasibility, and international comparability as the criteria.<sup>24</sup> Uphoff *et al.*, recommended using the Gol & Grimshaw model for evaluating indicators,<sup>27</sup> while a future direction for Zimmerman *et al.* was the evaluation of the indicators.<sup>28</sup> The working paper by Kelley and Hurst presented criteria that can be used to select indicators.<sup>20</sup> These included the importance of what is being measured (which includes policy importance), scientific soundness, and feasibility of the measure.<sup>20</sup>

## DISCUSSION

This review specifically examined existing ways to measure PCC. Patient-centred care has been increasingly adopted by many jurisdictions, however this review revealed there to be gaps in the measurement of PCC. Few articles met the inclusion criteria in the literature. Out of the 17 articles that met the inclusion criteria, only 9 were peer reviewed, and looked at specific conditions. Additionally, the heterogeneity of the PCC literature relates to the variety of definitions on PC-QIs, and a diverse type of indicators developed for different patient population and care-settings. For instance, all included articles in the review used the term 'indicator,' but not all presented indicators as defined by the Agency for Healthcare Research & Quality (AHRQ).<sup>12</sup>

The absence of a standard definition of what a PC-QI is in the literature has posed challenges in identifying the literature sources for inclusion in this review. 'Quality'



1  
2  
3 means different things to different people, and despite the standard definition of PCC by  
4 the Institute of Medicine, PCC continues to be operationalized and measured differently.<sup>2</sup>  
5 Most sources identified in the literature did not explicitly define what a quality indicator  
6 is, which may explain the differences in approaches to indicator development. The  
7 absence of a definition for quality indicators results in inconsistencies for how an  
8 indicator should be presented and also what makes for a good indicator. Previous reviews  
9 have also found variability in quality indicator definitions, such as indicators for hip  
10 fracture patient care.<sup>29</sup>  
11  
12

13  
14 In compliance with quality improvement agencies, quality councils and organizations  
15 such as the AHRQ, quality indicators should be presented as a unit of measurement - as a  
16 percentage or proportion.<sup>12</sup> Our review revealed inconsistencies in the definition of  
17 indicators. Only few sources in the non-peer reviewed literature included PC-QIs as  
18 quantifiable units, such as percentages, incorporating a numerator and denominator in the  
19 unit of measurement.<sup>30</sup> Most of the identified indicators were actually domains included  
20 in PCC measures and guidelines. The lack of defined units of measurement impedes  
21 comparisons across facilities, and benchmarking, and doesn't allow for longitudinal  
22 evaluation and overall measurement of care that is patient-centred. Without this unit of  
23 measurement for PC-QIs, it is difficult to target specific improvements needed for PCC.  
24  
25

26  
27 The review revealed that when incorporating the patient and caregiver perspective in  
28 quality improvement, a difficulty exists in translating perceptions and subjective  
29 experiences into standardized objective indicators. Measures of well-being are both  
30 necessary and important to incorporating a PCC model of care. The study by Carr *et al.*  
31 suggests that perceptions of health and its meaning vary between individuals and across  
32 time, as do their experiences and expectations of healthcare.<sup>31</sup> In order to capture various  
33 perspectives on quality care, it is vital to include patients and families. Including the  
34 patient and family perspective is necessary to ensure quality patient-centred care  
35

36  
37 Additionally, this review found large variances for domains to categorize approaches to  
38 measuring PCC. In an attempt to organize our findings and understand the ways of  
39 measuring PCC, we used a previously published person-centered care framework<sup>14</sup> to  
40 classify them into healthcare quality domains. From this classification, most strategies for  
41 measuring PCC were found to relate to domains associated with healthcare processes  
42 (e.g. cultivating communication). These findings are consistent with the current  
43 measurement landscape, for instance trauma indicators,<sup>32</sup> and AHRQ PC-QIs<sup>33</sup> which  
44 mainly assess processes and outcomes. For PCC, structures, such as policies and  
45 education programs can provide an important basis to improve PCC practice. In this  
46 review, structure indicators, were lacking.  
47  
48

49  
50 Finally, there is scarce evidence in the literature on how to implement indicators for PCC,  
51 and how to evaluate their implementation. PCC measurement has, to date, primarily  
52 focused on specific disease conditions and healthcare sectors. However, recent initiatives,  
53 (National Health Services) reveal a more generic approach to measurement (Family and  
54 Friend Test).<sup>34</sup> In order to create a standardized set of PC-QIs, indicators must be  
55 developed across the continuum of care. Stelfox *et al.* also found a lack of  
56  
57  
58  
59  
60

1  
2  
3 implementation of indicators in care settings in their review.<sup>32</sup> Before indicators are  
4 implemented, they must be evaluated according to standard set criteria. What constitutes  
5 as a good indicator has been outlined by health quality organizations, such as National  
6 Quality Forum. As outlined by the National Quality Forum, quality indicators should be  
7 evaluated through a set criteria including: importance, scientific acceptability, feasibility,  
8 and usability and use.<sup>35</sup> Our review did not identify any studies where such evaluations  
9 were implemented. In the development and implementation of quality indicators, the  
10 guideline set by the National Quality Forum should be adhered to.  
11  
12

### 13 **Strengths and Limitations**

14  
15 Our scoping review used robust and transparent methods guided by a protocol previously  
16 published,<sup>9</sup> and supported by a research librarian with expertise in knowledge synthesis  
17 and scoping reviews (DLL).  
18

19 This review may not have identified all relevant sources in the published and grey  
20 literature despite the support of experts on the team and processes implemented to ensure  
21 search comprehensiveness. A further risk of bias may have been enhanced by the fact that  
22 we conducted the search using only English terms.  
23  
24

25 The findings from this study will be used to inform the development and refinement of  
26 PC-QIs that may be used for implementation, as recommended by Stelfox & Straus  
27 (2013).<sup>36</sup> This includes a consensus process (modified Delphi)<sup>37</sup> – that will be conducted  
28 to evaluate the quality of the indicators and identify a core group of PC-QIs that can be  
29 implemented and evaluated at the system level. With this review, our aim is to inform the  
30 development of standard PC-QIs that can be implemented at various healthcare settings,  
31 around the world. A universal set of PC-QIs is needed to guide systematic monitoring  
32 and evaluation of patient-centred care nationally and globally.  
33  
34

35 In summary, our review is the first to examine the literature pertaining to quality  
36 indicators that are patient-centric. The identification of ways of measuring PCC in this  
37 scoping review is a key first step in laying the groundwork for developing evidence-  
38 based PC-QIs. Our findings will further the development of validated healthcare tools  
39 assessing healthcare quality from a patient-centred approach. Future research should  
40 focus on developing and refining PC-QIs that are ready to implement and evaluate  
41 following the criteria set forth by the National Quality Forum.<sup>35</sup>  
42  
43

44  
45 **Acknowledgements:** We would like to acknowledge the contributions of Ms. Lisa  
46 Goodman, who provided support for the grey literature search for this scoping review.  
47

48 Data sharing: no additional data available  
49

### 50 **Details of contributors:**

51 MJS conceived the study, and all authors identified key literature to be included in the  
52 review. MJS led the drafting of the manuscript and key discussion points with support  
53 from DL, RJJ, SA, ML and KM. SA managed the design of the tables (with feedback  
54 from all authors), and management of references. All authors provided important  
55  
56  
57  
58  
59  
60



1  
2  
3 intellectual contribution and guidance throughout the development of the manuscript.  
4 HQ, DL, SZ, and ML provided guidance on the presentation of the findings and guidance  
5 on final revisions. All of the authors contributed to critical review and revisions to the  
6 manuscript, agreeing on the final version.  
7

8  
9 **Funding:**

10 Dr. Santana secured funding from the M.S.I Foundation (Grant #886) based in Alberta,  
11 Canada. Dr. Lu acknowledges the support from the Alberta's Strategy for Patient  
12 Oriented Research (SPOR).  
13

14  
15 **Competing interests:** All authors have completed the ICMJE uniform disclosure form at  
16 [www.icmje.org/coi\\_disclosure.pdf](http://www.icmje.org/coi_disclosure.pdf) and declare: no support from any organisation for the  
17 submitted work; no financial relationships with any organisations that might have an  
18 interest in the submitted work in the previous three years; and no other relationships or  
19 activities that could appear to have influenced the submitted work  
20  
21

22 All authors had access to the data (literature identified and tables) in the study and  
23 assume responsibility for the integrity of the data and the accuracy of the data analysis.  
24

25  
26 The lead author\* affirms that this manuscript is an honest, accurate, and transparent  
27 account of the study being reported; that no important aspects of the study have been  
28 omitted; and that any discrepancies from the study as planned (and, if relevant,  
29 registered) have been explained.  
30

31  
32 The Corresponding Author has the right to grant on behalf of all authors and does grant  
33 on behalf of all authors, a worldwide license to the Publishers and its licensees in  
34 perpetuity, in all forms, formats and media (whether known now or created in the future),  
35 to i) publish, reproduce, distribute, display and store the Contribution, ii) translate the  
36 Contribution into other languages, create adaptations, reprints, include within collections  
37 and create summaries, extracts and/or, abstracts of the Contribution, iii) create any other  
38 derivative work(s) based on the Contribution, iv) to exploit all subsidiary rights in the  
39 Contribution, v) the inclusion of electronic links from the Contribution to third party  
40 material where-ever it may be located; and, vi) license any third party to do any or all of  
41 the above.  
42  
43  
44  
45  
46  
47  
48  
49  
50  
51  
52  
53  
54  
55  
56  
57  
58  
59  
60

## References

1. Doyle C, Lennox L, Bell D. A systematic review of evidence on the links between patient experience and clinical safety and effectiveness. *BMJ open* 2013;**3**(1):e001570.
2. Institute of Medicine. Crossing the quality chasm: a new health system for the 21st century. *National Academy Press* 2001.
3. Oates J, Weston WW, Jordan J. The impact of patient-centered care on outcomes. *Fam Pract* 2000;**49**:796-804.
4. Fung CH, Lim Y-W, Mattke S, et al. Systematic Review: The Evidence That Publishing Patient Care Performance Data Improves Quality of CareThe Impact of Publishing Performance Data on Quality of Care. *Annals of internal medicine* 2008;**148**(2):111-23.
5. Epstein RM, Fiscella K, Lesser CS, et al. Why the nation needs a policy push on patient-centered health care. *Health affairs* 2010;**29**(8):1489-95.
6. Braithwaite J, Hibbert P, Blakely B, et al. Health system frameworks and performance indicators in eight countries: A comparative international analysis. *SAGE Open Medicine* 2017;**5**:2050312116686516.
7. Quality Indicator Measure Development, Implementation, Maintenance, and Retirement Rockville, MD: Agency for Healthcare Research and Quality: Center for Health Policy Center for Primary Care and Outcomes Research & Battelle Memorial Institute 2011.
8. Hughes RG. Tools and strategies for quality improvement and patient safety 2008.
9. Jolley RJ, Lorenzetti DL, Manalili K, et al. Protocol for a scoping review study to identify and classify patient-centred quality indicators. *BMJ open* 2017;**7**(1):e013632.
10. Arksey H, O'Malley L. Scoping studies: towards a methodological framework. *International journal of social research methodology* 2005;**8**(1):19-32.
11. Levac D, Colquhoun H, O'Brien KK. Scoping studies: advancing the methodology. *Implementation Science* 2010;**5**(1):69.
12. Agency for Healthcare Research and Quality. Quality Improvement and monitoring at your fingertips. Secondary Quality Improvement and monitoring at your fingertips. <https://www.qualityindicators.ahrq.gov/> (accessed 01 Oct 2017).
13. Synthesis. Secondary Synthesis 2016. <http://synthesis.info/> (accessed 01 Oct 2017).
14. Santana MJ, Manalili K, Jolley RJ, et al. How to practice person-centred care: A conceptual framework. *Health Expectations* 2017.
15. Donabedian A. The definition of quality and approaches to its assessment. Explorations in quality assessment and monitoring 1980.
16. Wensing M, Grol R, van Montfort P, et al. Indicators of the quality of general practice care of patients with chronic illness: a step towards the real involvement of patients in the assessment of the quality of care. *Quality and Safety in Health Care* 1996;**5**(2):73-80.
17. International Alliance of Patients' Organizations (IAPO). Patient-Centred Healthcare Indicators Review 2012.
18. NHS. Essence of Care Patient-focused benchmarks for clinical governance 2003.

19. Davies P, Wye L, Horrocks S, et al. Developing quality indicators for community services: the case of district nursing. *Quality in primary care* 2011;**19**(3):155.
20. Kelley E, Hurst J. Health care quality indicators project 2006.
21. Registered Nurses Association of Ontario. Client Centred Care. Toronto, Ontario 2002.
22. Lewis S. Patient-centered care: an introduction to what it is and how to achieve it. Saskatchewan Ministry of Health 2009.
23. OECD. Health Care Quality Indicators - Responsiveness and Patient Experiences. Secondary Health Care Quality Indicators - Responsiveness and Patient Experiences 2006. <http://www.oecd.org/els/health-systems/hcqi-responsiveness-and-patient-experiences.htm> (accessed 01 Oct 2017).
24. Carinci F, Van Gool K, Mainz J, et al. Towards actionable international comparisons of health system performance: expert revision of the OECD framework and quality indicators. *International Journal for Quality in Health Care* 2015;**27**(2):137-46.
25. Dreesen M, Foulon V, Vanhaecht K, et al. Identifying patient-centered quality indicators for the care of adult home parenteral nutrition (HPN) patients. *Journal of Parenteral and Enteral Nutrition* 2014;**38**(7):840-46.
26. Ouwens M, Hermens R, Hulscher M, et al. Development of indicators for patient-centred cancer care. *Supportive Care in cancer* 2010;**18**(1):121.
27. Uphoff EP, Wennekes L, Punt CJ, et al. Development of generic quality indicators for patient-centered cancer care by using a RAND modified Delphi method. *Cancer nursing* 2012;**35**(1):29-37.
28. Zimmerman S, Love K, Cohen LW, et al. Person-Centeredness in Home-and Community-Based Services and Supports: Domains, Attributes, and Assisted Living Indicators. *Clinical Gerontologist* 2014;**37**(5):429-45.
29. Pitzul KB, Munce SE, Perrier L, et al. Scoping review of potential quality indicators for hip fracture patient care. *BMJ open* 2017;**7**(3):e014769.
30. Hermann RC, Mattke S, Somekh D, et al. Quality indicators for international benchmarking of mental health care. *International Journal for Quality in Health Care* 2006;**18**(suppl\_1):31-38.
31. Carr AJ, Gibson B, Robinson PG. Measuring quality of life: Is quality of life determined by expectations or experience? *BMJ: British Medical Journal* 2001;**322**(7296):1240.
32. Santana MJ, Stelfox HT. Quality indicators used by trauma centers for performance measurement. *Journal of Trauma and Acute Care Surgery* 2012;**72**(5):1298-303.
33. Agency for Healthcare Research and Quality. Pediatric Quality Indicators Overview. Secondary Pediatric Quality Indicators Overview. [https://www.qualityindicators.ahrq.gov/modules/pdi\\_resources.aspx](https://www.qualityindicators.ahrq.gov/modules/pdi_resources.aspx) (accessed 01 Oct 2017).
34. National Health Services UK. Friends and Family Test. <https://www.england.nhs.uk/fft/> (accessed 20 December 2017).
35. National Quality Forum. Measure Evaluation Criteria. Secondary Measure Evaluation Criteria. [http://www.qualityforum.org/Measuring\\_Performance/Submitting\\_Standards/Measure\\_Evaluation\\_Criteria.aspx](http://www.qualityforum.org/Measuring_Performance/Submitting_Standards/Measure_Evaluation_Criteria.aspx) (accessed 01 Oct 2017).

- 1  
2  
3 36. Stelfox HT, Straus SE. Measuring quality of care: considering conceptual approaches  
4 to quality indicator development and evaluation. *Journal of clinical epidemiology*  
5 2013;**66**(12):1328-37.  
6  
7 37. Fitch K, Bernstein SJ, Aguilar MD, et al. The RAND/UCLA appropriateness method  
8 user's manual: RAND CORP SANTA MONICA CA 2001.  
9  
10 38. den Breejen E, Nelen W, Schol S, et al. Development of guideline-based indicators  
11 for patient-centredness in fertility care: what patients add. *Human reproduction*  
12 2013;**28**(4):987-96.  
13  
14 39. Sewitch MJ, Dubé C, Brien S, et al. Patient-identified quality indicators for  
15 colonoscopy services. *Canadian Journal of Gastroenterology and Hepatology*  
16 2013;**27**(1):25-32.  
17  
18 40. Cox J, Gray A. NHS at the hustings: four quality indicators for a person centred  
19 medicine. *European Journal for Person Centered Healthcare* 2015;**3**(1):1-3.  
20  
21 41. Silow-Carroll S, Alteras T, Stepnick L. Patient-centered Care for Underserved  
22 Populations: Definition and Best Practices: Economic and Social Research  
23 Institute Washington, DC 2006.  
24  
25 42. Lawrence M, Olesen F. Indicators of quality in health care. *The European Journal of*  
26 *General Practice* 1997;**3**(3):103-08.  
27  
28 43. Campbell S, Braspenning J, Hutchinson A, et al. Research methods used in  
29 developing and applying quality indicators in primary care. *Qual Saf Health Care*  
30 2002;**11**(4):358-64.  
31  
32 44. Pencheon D. The good indicators guide: understanding how to use and choose  
33 indicators: NHS Institute for Innovation and Improvement 2008.  
34  
35 45. Mainz J. Defining and classifying clinical indicators for quality improvement.  
36 *International Journal for Quality in Health Care* 2003;**15**(6):523-30.  
37  
38  
39  
40  
41  
42  
43  
44  
45  
46  
47  
48  
49  
50  
51  
52  
53  
54  
55  
56  
57  
58  
59  
60

1  
2  
3  
4  
5  
6  
7  
8  
9  
10  
11  
12  
13  
14  
15  
16  
17  
18  
19  
20  
21  
22  
23  
24  
25  
26  
27  
28  
29  
30  
31  
32  
33  
34  
35  
36  
37  
38  
39  
40  
41  
42  
43  
44  
45  
46  
47  
48  
49  
50  
51  
52  
53  
54  
55  
56  
57  
58  
59  
60

For peer review only

Figure 1- Flow Diagram for study inclusion

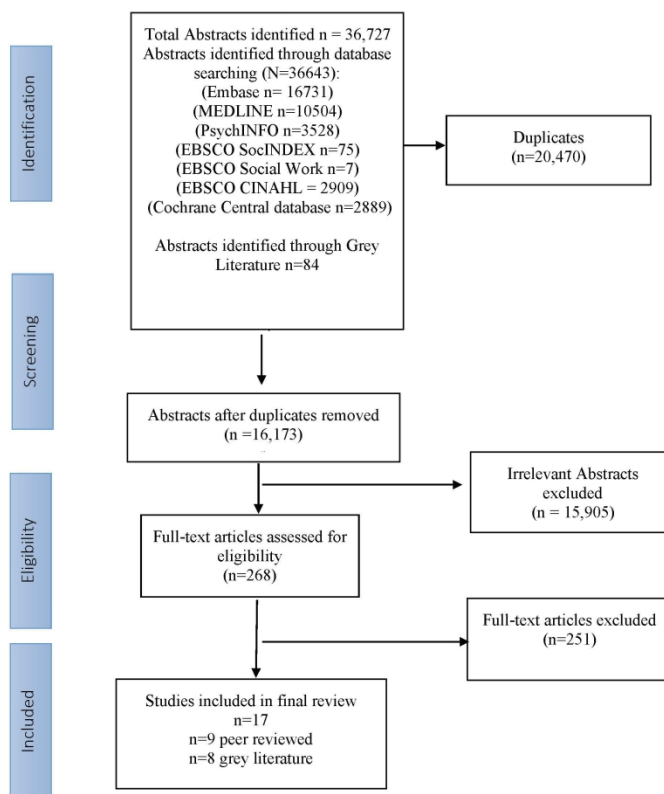

215x279mm (300 x 300 DPI)

## Patient-Centered Quality Indicators Search Strategies

Jan 17 2017

MEDLINE

1. exp patient-centered care/
2. Culturally Competent Care/ or exp ethnic groups/  
((carer\* or care giver\* or caregiver\* or client\* or culture\* or cultural\* or ethnic\* or family or families or indigenous or parents or patient\* or person or racial\* or ethnocultural\* or immigrant\* or refugee\* or migrant\*) and (centered\* or centred\* or focused) and (care or healthcare or nursing or medical or medicine)).kw.
3. ((carer\* or care giver\* or caregiver\* or client\* or culture\* or cultural\* or ethnic\* or family or families or indigenous or parents or patient\* or person or racial\* or ethnocultural\* or immigrant\* or refugee\* or migrant\*) and (centered\* or centred\* or focused) and (care or healthcare or nursing or medical or medicine)).kw.
4. ((carer\* or care giver\* or caregiver\* or client\* or culture\* or cultural\* or ethnic\* or family or families or indigenous or parents or patient\* or person or racial\* or ethnocultural\* or immigrant\* or refugee\* or migrant\*) adj5 (centered\* or centred\* or focused) adj5 (care or healthcare or nursing or medical or medicine)).tw.
5. cultural competency/ or patient satisfaction/ or patient preference/
6. exp Patient Rights/  
((carer\* or care giver\* or caregiver\* or client\* or cultural\* or culture\* or ethnic\* or family or families or indigenous or parents or patient\* or racial\* or ethnocultural\* or immigrant\* or refugee\* or migrant\*) adj5 (advocacy or autonomy or beliefs or choice or perspectives or preferences or rights or satisfaction or values or views) adj5 (care or healthcare or nursing or medical or medicine)).tw.
7. ((cultural\* or ethnic\* or racial\* or ethnocultural\* or immigrant\* or refugee\* or migrant\*) adj10 (competency or competent care)).tw.
8. 1 or 2 or 3 or 4 or 5 or 6 or 7 or 8
9. exp Quality Indicators, Health Care/
10. benchmarking/ or clinical audit/  
(performance measure\* or (healthcare adj3 monitor\*) or performance reporting or QI or PQR or (quality adj3 criteria) or (quality adj3 indicator\*) or (quality adj3 measure\*) or (quality adj3 scale\*)).tw,kw.
11. Guideline Adherence/
12. 10 or 11 or 12 or 13
13. 9 and 14
14. limit 15 to yr="1990 -Current"
15. limit 16 to yr="2015 -Current"

## Patient-Centered Quality Indicators Search Strategies

Jan 17 2017

EMBASE

1. cultural competence/ or exp ethnic group/ or exp "ethnic or racial aspects"/
2. patient satisfaction/
3. patient preference/
4. exp patient right/  
((carer\* or care giver\* or caregiver\* or client\* or culture\* or cultural\* or ethnic\* or family or families or indigenous or parents or patient\* or person or racial\* or ethnocultural\* or immigrant\* or refugee\* or migrant\*) and (centered\* or centred\* or focused) and (care or healthcare or nursing or medical or medicine)).kw.
5. ((carer\* or care giver\* or caregiver\* or client\* or culture\* or cultural\* or ethnic\* or family or families or indigenous or parents or patient\* or person or racial\* or ethnocultural\* or immigrant\* or refugee\* or migrant\*) and (centered\* or centred\* or focused) and (care or healthcare or nursing or medical or medicine)).kw.
6. ((carer\* or care giver\* or caregiver\* or client\* or culture\* or cultural\* or ethnic\* or family or families or indigenous or parents or patient\* or person or racial\* or ethnocultural\* or immigrant\* or refugee\* or migrant\*) adj5 (centered\* or centred\* or focused) adj5 (care or healthcare or nursing or medical or medicine)).tw.
7. ((carer\* or care giver\* or caregiver\* or client\* or culture\* or cultural\* or ethnic\* or family or families or indigenous or parents or patient\* or racial\* or ethnocultural\* or immigrant\* or refugee\* or migrant\*) adj5 (advocacy or autonomy or beliefs or choice or perspectives or preferences or rights or satisfaction or values or views) adj5 (care or healthcare or nursing or medical or medicine)).tw.
8. ((cultural\* or ethnic\* or racial\* or ethnocultural\* or immigrant\* or refugee\* or migrant\*) adj10 (competency or competent care)).tw.
9. 1 or 2 or 3 or 4 or 5 or 6 or 7 or 8
10. quality control/ or medical audit/
11. performance measurement system/  
(performance measure\* or (healthcare adj3 monitor\*) or performance reporting or QI or PQI or (quality adj3 criteria) or (quality adj3 indicator\*) or (quality adj3 measure\*) or (quality adj3 scale\*)).tw,kw.
12. PQI or (quality adj3 criteria) or (quality adj3 indicator\*) or (quality adj3 measure\*) or (quality adj3 scale\*)).tw,kw.
13. 10 or 11 or 12
14. 9 and 13
15. limit 14 to yr="1990 -Current"
16. limit 14 to yr="2015 -Current"
17. limit 16 to yr="2015 -Current"



# BMJ Open Protocol for a scoping review study to identify and classify patient-centred quality indicators

Rachel J Jolley,<sup>1</sup> Diane L Lorenzetti,<sup>1,2</sup> Kimberly Manalili,<sup>1</sup> Mingshan Lu,<sup>1,3</sup> Hude Quan,<sup>1</sup> Maria J Santana<sup>1</sup>

**To cite:** Jolley RJ, Lorenzetti DL, Manalili K, et al. Protocol for a scoping review study to identify and classify patient-centred quality indicators. *BMJ Open* 2016;**6**:e013632. doi:10.1136/bmjopen-2016-013632

► Prepublication history and additional material is available. To view please visit the journal (<http://dx.doi.org/10.1136/bmjopen-2016-013632>).

Received 27 July 2016  
Revised 12 October 2016  
Accepted 20 October 2016

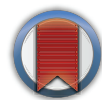

CrossMark

<sup>1</sup>Department of Community Health Sciences, University of Calgary, Calgary, Alberta, Canada

<sup>2</sup>Institute of Health Economics, Edmonton, Alberta, Canada

<sup>3</sup>Department of Economics, University of Calgary, Calgary, Alberta, Canada

## Correspondence to

Dr Maria J Santana;  
[mjsantan@ucalgary.ca](mailto:mjsantan@ucalgary.ca)

## ABSTRACT

**Introduction:** The concept of patient-centred care (PCC) is changing the way healthcare is understood, accepted and delivered. The Institute of Medicine has defined PCC as 1 of its 6 aims to improve healthcare quality. However, in Canada, there are currently no nationwide standards in place for measuring and evaluating healthcare from a patient-centred approach. In this paper, we outline our scoping review protocol to systematically review published and unpublished literature specific to patient-centred quality indicators that have been implemented and evaluated across various care settings.

**Methods and analysis:** Arksey and O'Malley's scoping review methodology framework will guide the conduct of this scoping review. We will search electronic databases (MEDLINE, EMBASE, the Cochrane Library, Cumulative Index to Nursing and Allied Health Literature (CINAHL), PsycINFO, Social Work Abstracts, Social Services Abstracts), grey literature sources and the reference lists of key studies to identify studies appropriate for inclusion. 2

reviewers will independently screen all abstracts and full-text studies for inclusion. We will include any study which focuses on quality indicators in the context of PCC. All bibliographic data, study characteristics and indicators will be collected and analysed using a tool developed through an iterative process by the research team. Indicators will be classified according to a predefined conceptual framework and categorised and described using qualitative content analysis.

**Ethics and dissemination:** The scoping review will synthesise patient-centred quality indicators and their characteristics as described in the literature. This review will be the first step to formally identify what quality indicators have been used to evaluate PCC across the healthcare continuum, and will be used to inform a stakeholder consensus process exploring the development of a generic set of patient-centred quality indicators applicable to multiple care settings. The results will be disseminated through a peer-reviewed publication, conference presentations and a one-day stakeholder meeting.

## BACKGROUND

The concept of patient-centred care is changing the way healthcare is understood,

## Strengths and limitations of this study

- This will be the first scoping review to identify quality indicators that are specific to patient-centred care across multiple different conditions and healthcare settings.
- The search strategy includes seven electronic databases with peer-reviewed literature, including article bibliographies and numerous conference proceedings, as well as a broad range of grey literature sources, including government and other organisation websites including quality improvement documents.
- Stakeholders including patient networks will be consulted and engaged throughout the study review process.
- Although this study will identify candidate indicators for further development, there will be no formal assessment of study quality or direct comparison of quality of the indicators.

accepted and delivered. Traditionally, the quality of healthcare has been driven by policymakers and evaluated through the lens of healthcare professionals and management only, often excluding the patient perspective. Stakeholders from across the continuum of care have called for evidence-informed system improvements to foster innovation and improve the delivery of care; recent policy emphasises that patient views complement healthcare provider perspectives, as well as provide unique information about healthcare effectiveness.<sup>1</sup>

In its landmark report, *Crossing the Quality Chasm*, the Institute of Medicine (IOM) outlined six aims for quality improvement, which include the core need for healthcare to be patient-centred.<sup>2</sup> According to the IOM's definition, patient-centred care is care that aims to include the patients' values, needs and preferences in the healthcare system, ensuring that patient values guide all clinical decisions.<sup>2</sup> This concept of patient-centred care has carried into other

1 healthcare improvement strategies. The Institute for  
2 Healthcare Improvement has incorporated the aim of  
3 improving the patient experience of care as one of its  
4 three dimensions in its 'Triple Aim', alongside improv-  
5 ing the health of populations, and reducing per capita  
6 costs of healthcare.<sup>3</sup> Implementing a patient-centred  
7 approach is therefore necessary towards improving and  
8 achieving a high level of healthcare quality.

9 Although patient-centredness is changing the way  
10 healthcare systems around the world operate, healthcare  
11 performance measurement has yet to truly incorporate  
12 this patient-centred dimension of healthcare quality.  
13 The importance of systematic measurement and feed-  
14 back to achieving patient-centred care is useful for moni-  
15 toring and guiding improvement within organisations, as  
16 well as for holding organisations accountable for their  
17 results through public reporting.<sup>4</sup> Healthcare quality  
18 indicators provide information that can be used to assess  
19 the quality of care, and are essential to optimise health-  
20 care quality, track improvements and establish quality of  
21 care benchmarks, leading to changes in the care pro-  
22 vided.<sup>5</sup> The WHO has recently created the *WHO global*  
23 *strategy on people-centred and integrated health services*,<sup>6</sup> but  
24 has noted: 'as of yet there are no universally accepted  
25 indicators to measure progress in establishing integrated  
26 people-centred health services'.

27 For the most part, quality has been measured in terms  
28 of service and system performance without incorporat-  
29 ing the patient perspective, needs or values. Healthcare  
30 quality indicators from and/or incorporating patient  
31 perspectives are lacking and have not been routinely  
32 integrated into the evaluation of healthcare system per-  
33 formance; rather, system performance measurement has  
34 traditionally relied on routinely collected administrative  
35 and clinical data to monitor procedures, drug and treat-  
36 ment interventions, and outcomes.<sup>7-9</sup> It has also been  
37 argued that patients lack the expertise to evaluate care  
38 received.<sup>10 11</sup> However, positive patient experiences have  
39 been linked to improved patient health status, while  
40 negative patient experiences have been shown to  
41 adversely affect health outcomes.<sup>12-14</sup>

42 The overall understanding of patient-centred care also  
43 varies from patients to providers to decision-makers. For  
44 instance, patients may value communication with health-  
45 care providers, whereas providers may be more con-  
46 cerned about the effectiveness of treatment, and  
47 decision-makers may tend to focus on issues that affect  
48 the system, such as readmission rates and resource use.  
49 Thus, it is important to identify and implement measures  
50 that are relevant to patients and reflect their needs and  
51 values. It is also important to include the perspectives of  
52 family members and/or caregivers, who provide support  
53 to patients and may help to advocate on their behalf. In  
54 summary, in order to guide healthcare policy and imple-  
55 ment practice change, healthcare systems need to  
56 develop and implement cost-effective and efficient  
57 ongoing mechanisms to measure and evaluate healthcare  
58 quality that incorporates all of these perspectives.

## STUDY RATIONALE

Globally, healthcare policy and programmes have begun  
to promote patient-centred care models that could be  
implemented, measured and improved. The importance  
of measuring the effectiveness of patient-centred care has  
been identified as a need by multiple organisations<sup>1-3 6</sup>  
in the process of transitioning towards the implementa-  
tion of a patient-centred care healthcare model.  
However, despite a large number of heterogeneous,  
disease and setting-specific indicators that have been pro-  
posed, it is unclear the extent to which these indicators  
have been tested, implemented or validated. Further, there  
is currently no single set of generic indicators that exist  
which can be implemented to measure patient-centred  
care across multiple disease groups or care settings. There  
is no existing published synthesis on patient-centred  
quality indicators (PC-QIs) that incorporates both the peer-  
reviewed and non-peer-reviewed literature.

## STUDY OBJECTIVES

The objectives of this scoping review are to systematically  
scope the literature on PC-QIs, identify specific  
characteristics of these indicators and their definitions,  
and map indicators according to the thematic domains  
by which they can be classified. The indicators will be  
classified according to a predefined conceptual quality  
improvement framework adapted by the study team.  
Through this process, we will generate a comprehensive  
and well-defined list of unique indicators that may  
inform the adoption of standardised patient-centred  
care indicators. This work will constitute the first step in  
a multistep research programme aimed at the develop-  
ment of evidence-informed quality indicators to measure  
and evaluate the implementation and practice of  
patient-centred care across the continuum of care; the  
indicators determined through this review will subse-  
quently be validated through a consensus review process.  
This information will allow healthcare organisations to  
assess the quality of patient-centred care being delivered,  
and provide outcome measurement data that can be  
used by healthcare system regulators and healthcare pro-  
fessionals to target efforts to improve care and service  
delivery that reflects what patients need and want.

## METHODS AND ANALYSIS

### Conceptual model

Our scoping review will use the Donabedian conceptual  
framework<sup>15</sup> for assessing the quality of care using *struc-*  
*ture, process and outcome* components of quality, to map  
PC-QIs and categorise them according to relevant the-  
matic domains. This framework will serve as a guide for  
synthesising the literature and determining how quality  
indicators can be classified. *Structure* in this context  
encompasses the physical setting and organisational  
characteristics in which healthcare is provided, including  
materials and health resources; *process* comprises the  
methods by which healthcare is provided, and is

dependent on the structures to provide resources and mechanisms to carry out care, therefore directly resulting in and impacting patient outcomes; *outcomes* are the result of healthcare provided and include the health status and experiences of patients and communities. Although Donabedian's model does not take into account specific patient factors,<sup>16</sup> we have selected it because this model is perhaps the most widely used 'gold' standard for guiding quality improvement activities in healthcare. Specifically, this model has been used to outline the potential mechanisms of variation in quality and applied across a spectrum of healthcare settings and disease diagnoses, as well as being used to operationalise other types of healthcare quality measures (ie, Agency for Healthcare Research and Quality—Quality Indicators).<sup>17</sup>

A second dimension of indicator classification that will be applied, in conjunction with the Donabedian model, will include patient-centred care-relevant domains taken from existing frameworks and evidence of domains in patient-centred care, for instance (but not limited to) the Picker Institute's Eight Principles for Patient-Centred Care<sup>18</sup> and the British Columbia Patient-Centered Care Framework.<sup>19</sup> To illustrate how we will apply Donabedian's model and patient-centric domains, we have provided an example in [table 1](#). For example, patient-provider communication is an important thematic domain for patient-centred care; for the Donabedian component structure, an indicator example would be the development of an electronic-health or 'e-health' information technology system to support the communication between patients and healthcare providers across the continuum of care.

### Protocol design

Methods for this study were developed based on Arksey and O'Malley's<sup>20</sup> scoping review methodology, and Levac *et al's*<sup>21</sup> methodological enhancement. According to this framework, there are six different stages in undertaking a scoping review: (1) identifying the research question; (2) identifying relevant studies; (3) selecting studies; (4) charting the data; (5) collating, summarising and reporting the results and (6) consulting with relevant stakeholders.

### Stage 1: Identifying the research question

Through consultation with the research team and key stakeholders, the overall main research question

developed is defined as: 'What are the quality indicators that have been implemented and evaluated across various points-of-care settings, processes of care and systems level proposed or currently in use to measure patient-centred care?'. For the purpose of this review, a quality indicator is 'an explicitly and measurable item which act as building blocks in the assessment of care'.<sup>22</sup>

### Stage 2: Identifying relevant studies

#### Search strategy and information sources

Identification of studies relevant to this review will be achieved by searching electronic databases of the published literature which will include: MEDLINE, EMBASE, the Cochrane Library, Cumulative Index to Nursing and Allied Health Literature (CINAHL), PsycINFO, Social Work Abstracts and Social Services Abstracts. (The proposed search strategy is shown in online supplementary appendix 1'.) We will also hand-search all reference lists of included studies to identify additional studies of relevance.

To ensure that all relevant information is captured, we will also search a variety of grey literature sources. We will search relevant grey literature databases (eg, Grey Literature Report, OpenGrey, Web of Science Conference Proceedings) to identify studies, reports and conference abstracts of relevance to this review. We will also conduct a targeted search of the grey literature in local, provincial, national and international organisations' websites and related health or scientific organisations including: Patients Canada,<sup>23</sup> the Patient-centered Outcomes Research Institute (PCORI).<sup>24</sup>

Search terms will be determined with input from the research team, research collaborators and knowledge users. The search strategy will be developed by an experienced research librarian and coauthor (DLL), and will be revised pending input from stakeholders. Specifically, our patient-partner will be consulted for contribution of specific search terms regarding patient-centred care for the aspects of measurement to search the grey literature, as we suspect there will be more relevant existing grey literature on this topic. To ensure that no bias occurs, the patient-partner will be blinded to the original search strategy developed by the research team. Database and other searches will combine terms from two themes: quality indicators (eg, quality indicators, QI, performance indicators) and patient-centred care (eg, patient centered, patient centred, patient centric, patient beliefs, culture, ethnicity). Terms will be searched as both

**Table 1** Example of indicator classification using the Donabedian model and patient-centred care domains.

| Example of PCC thematic domains   | Donabedian framework of quality <sup>11</sup>                                                                   |                                                                         |                                                             |
|-----------------------------------|-----------------------------------------------------------------------------------------------------------------|-------------------------------------------------------------------------|-------------------------------------------------------------|
|                                   | Structure                                                                                                       | Process                                                                 | Outcome                                                     |
| 1. Patient-provider communication | Development of innovative e-health information technology to support and enhance patient-provider communication | Listening and responding to patients' concerns and expectations of care | Effective and timely access to care and consultation length |

PCC, patient-centred care.



1 keywords in the title and/or abstract and subject head-  
2 ings (eg, MeSH, Emtree) as appropriate. No language  
3 or date limits will be applied. Search results will be down-  
4 loaded and imported into a custom-written Java software  
5 application called Synthesis,<sup>25</sup> specifically created for sys-  
6 tematic and scoping literature reviews.

### 8 Stage 3: Study selection

9 The review process will consist of two levels of screening:  
10 (1) a title and abstract review and (2) full-text review.  
11 For the first level of screening, two investigators will  
12 independently screen the title and abstract of all  
13 retrieved citations for inclusion against a set of  
14 minimum inclusion criteria. The criteria will be tested  
15 on a sample of abstracts prior to beginning the abstract  
16 review to ensure that they are robust enough to capture  
17 any articles that may relate to PC-QIs. Any articles that  
18 are deemed relevant by either or both of the reviewers  
19 will be included in the full-text review. In the second  
20 step, the two investigators will then each independently  
21 assess the full-text articles to determine if they meet the  
22 inclusion/exclusion criteria. To determine inter-rater  
23 agreement, Cohen's  $\kappa$  statistic<sup>26</sup> will be calculated at  
24 both the title and abstract review stage and at the full  
25 article review stage. Any discordant full-text articles will  
26 be reviewed a second time and further disagreements  
27 about study eligibility at the full-text review stage will be  
28 resolved through discussion with a third investigator  
29 until full consensus is obtained.

30 Relevant studies will be included if they describe the  
31 concept of patient-centredness or patient-centred care,  
32 and describe quality measurement or indicators concerned  
33 with patient-centred care, which can be a single measure  
34 or a set of measures. These measures can include patient-  
35 reported outcome and patient-reported experience mea-  
36 sures. Studies included can be on any of (a) development;  
37 (b) implementation; (c) evaluation; or (d) comparative  
38 validation of such measures. Any type of study design (eg,  
39 randomised control trials, case-control study, prospective  
40 or retrospective cohort study, quasi-experimental, qualita-  
41 tive) will be included. Studies will be excluded if they  
42 describe or evaluate quality improvement indicators in  
43 healthcare that are not patient-centric.

### 45 Stage 4: Data collection

46 A data collection instrument will be developed by the  
47 research team to confirm study relevance and to extract  
48 study characteristics. Study characteristics to be extracted  
49 will include, but not be limited to: publication year, pub-  
50 lication type (eg, original research), study design,  
51 country, patient population characteristics, healthcare  
52 setting, patient-centered definition, description of  
53 quality indicators including definition, numerator, dom-  
54 inator, psychometrics of the indicators (face validity, reli-  
55 ability, construct validity, risk adjustment), and whether  
56 patients were involved in the development of the indica-  
57 tors. This form will be reviewed by the research team  
58 and pretested by all reviewers before implementation to

ensure that the form is capturing the information accur-  
ately. Data abstraction will be conducted in duplicate  
with two reviewers independently extracting data from  
all included studies. To ensure accurate data collection,  
each reviewer's independent abstracted data will be com-  
pared and any discrepancies will be further discussed to  
ensure consistency between the reviewers. The data will  
be compiled in a single literature review software  
program, Synthesis, and then downloaded into a single  
excel spreadsheet in Microsoft Excel software for valid-  
ation and coding.

### Stage 5: Data summary and synthesis of results

Since a scoping review can be used to map the concepts  
underpinning a research area and the main sources and  
types of evidence available, the aggregated findings  
provide an overview of the research rather than an  
assessment of the quality of individual studies. For our  
scoping review, the quality indicators identified and  
extracted will be coded based on the Donabedian model  
and thematic dimensions of patient-centred care as dis-  
cussed above. From this, a list of candidate quality indi-  
cators for further development and potential systematic  
reviews will be presented.

### Stage 6: Consultation

Levac *et al*<sup>21</sup> suggest that the consultation stage provides  
opportunities for stakeholder involvement, providing  
insights beyond what is reported in the literature. To  
address the study's patient-centric approach, stake-  
holders, in particular a patient-partner, will be engaged  
throughout the study acting as a consultant and knowl-  
edge user. Specifically, she will provide input regarding  
the search strategy and grey literature search to integrate  
the patient voice in capturing what is important to a  
patient in addressing measurement. This targeted search  
will be informed by input from subject experts and our  
provincial, national and international collaborators in  
different jurisdictions at the national level with the  
Canadian Institute for Health Information, the provin-  
cial level with Health Quality Councils, and internation-  
ally consult with experts in patient-centred care and  
measurement in the UK, Australia and Sweden. In addi-  
tion, our patient-partner will connect with patient net-  
works to provide a summary of results.

## DISSEMINATION AND ETHICS

This study will constitute the first step in a multistep  
research programme aimed at developing a set of  
evidence-based PC-QIs that can be used across the  
healthcare spectrum. The results from this scoping  
review will guide the next phase of a multifaceted  
research programme that will lead to development of a  
set of PC-QIs that can be implemented at the system  
level to measure and monitor patient-centred care.

Since the scoping review methodology consists of  
reviewing and collecting data from publicly available

materials, this study does not require ethics approval. To facilitate knowledge translation activities, our research team will use an integrated approach involving consulting a patient-partner to guide the research objectives and presenting the findings to other key health system stakeholders.

**Contributors** MJS conceived of the idea, developed the research question and study methods and contributed meaningfully to the drafting and editing; she has also approved the final manuscript. RJJ, DLL, KM, ML and HQ aided in developing the research question and study methods, contributed meaningfully to the drafting and editing, and approved the final manuscript.

**Funding** This work is being supported by an MSI (Medical Services Incorporated) Foundation grant (Canada).

**Competing interests** None declared.

**Provenance and peer review** Not commissioned; externally peer reviewed.

**Data sharing statement** No additional data are available.

**Open Access** This is an Open Access article distributed in accordance with the Creative Commons Attribution Non Commercial (CC BY-NC 4.0) license, which permits others to distribute, remix, adapt, build upon this work non-commercially, and license their derivative works on different terms, provided the original work is properly cited and the use is non-commercial. See: <http://creativecommons.org/licenses/by-nc/4.0/>

## REFERENCES

- Shaller D. *Patient-centred care: what does it take?* The Commonwealth Fund, 2007.
- Institute of Medicine. *Crossing the Quality Chasm: A New Health System for the 21st Century*. Washington, DC: National Academy Press; 2001.
- Berwick DM, Nolan TW, Whittington J. The triple aim: care, health, and cost. *Health Aff (Millwood)* 2008;27:759–69.
- Hafner JM, Williams SC, Koss RG, *et al*. The perceived impact of public reporting hospital performance data: interviews with hospital staff. *Int J Qual Health Care* 2011;23:697–704.
- Lawrence M, Olesen F. Indicators of quality health care. *Eur J Gen Pract* 1997;3:103–8.
- World Health Organization. WHO global strategy on people-centred and integrated health services. Interim report. 2015 (accessed May 2016). [http://apps.who.int/iris/bitstream/10665/155002/1/WHO\\_HIS\\_SDS\\_2015.6\\_eng.pdf?ua=1&ua=1](http://apps.who.int/iris/bitstream/10665/155002/1/WHO_HIS_SDS_2015.6_eng.pdf?ua=1&ua=1)
- Burge FI, Bower K, Putnam W, *et al*. Quality indicators for cardiovascular primary care. *Can J Cardiol* 2007;23:383–8.
- Santana MJ, Stelfox HT. Quality indicators used by trauma centers for performance measurement. *J Trauma Acute Care Surg* 2012;72:1298–302.
- AHRQ Guide to Inpatient Quality Indicators: Quality of Care in Hospitals—Volume, Mortality, and Utilization. [http://www.qualityindicators.ahrq.gov/downloads/modules/iqi/v31/iqi/iqi\\_guide\\_v31.pdf](http://www.qualityindicators.ahrq.gov/downloads/modules/iqi/v31/iqi/iqi_guide_v31.pdf) (accessed 3 Jun 2016).
- Nelson EC, Hays RD, Larson C, *et al*. The patient judgment system: reliability and validity. *Qual Rev Bull* 1989;15:185–91.
- Patwardhan A, Spencer CH. Are patient surveys valuable as a service improvement tool in health services? An overview. *J Healthc Leadersh* 2012;4:33–46.
- Fung CH, Lim YW, Mattke S, *et al*. Systematic review: the evidence that publishing patient care performance data improves quality of care. *Ann Intern Med* 2008;148:111–23.
- Kemp KA, Santana MJ, Southern DA, *et al*. Association of inpatient hospital experience with patient safety indicators: a cross-sectional, Canadian study. *BMJ Open* 2016;6:e011242.
- Isaac T, Zaslavsky AM, Cleary PD, *et al*. The relationship between patients' perception of care and measures of hospital safety and quality. *Health Serv Res* 2010;45:1024–40.
- Donabedian A. *Explorations in quality assessment and monitoring. The definition of quality and approaches to its assessment*. Vol 1. Ann Arbo, MI: Health Administration Press, 1980.
- McDonald KM, Sundaram V, Bravata DM, *et al*. *Closing the quality gap: a critical analysis of quality improvement strategies (Vol. 7: Care Coordination)*. Rockville, MD: Agency for Healthcare Research and Quality (US), 2007. (Technical Reviews, No. 9.7.5), Conceptual Frameworks and Their Application to Evaluating Care Coordination Interventions. <http://www.ncbi.nlm.nih.gov/books/NBK44008/> (accessed Jun 2016).
- Agency for Healthcare Research and Quality AHRQ-Quality Indicators. <http://www.qualityindicators.ahrq.gov/> (accessed 1 Oct 2016).
- Pickereurope.org's Principles of patient centred care. <http://www.pickereurope.org/about-us/principles-of-patient-centred-care/> (accessed Jun 2016).
- British Columbia Ministry of Health 2015. The British Columbia Patient-Centred Care Framework. [http://www.health.gov.bc.ca/library/publications/year/2015\\_a-pt-centred-care-framework.pdf](http://www.health.gov.bc.ca/library/publications/year/2015_a-pt-centred-care-framework.pdf) (accessed Jun 2016).
- Arksey H, O'Malley L. Scoping studies: towards a methodological framework. *Int J Soc Res Methodol* 2005;8:19–42.
- Levac D, Colquhoun H, O'Brien KK. Scoping studies: advancing the methodology. *Implement Sci* 2010;5:69.
- Campbell SM, Braspenning J, Hutchinson A, *et al*. Research methods used in developing and applying quality indicators in primary care. *Qual Saf Health Care* 2002;11:358–64.
- Patients Canada. <http://www.patientscanada.ca/> (accessed Jun 2016).
- The Patient-centered Outcomes Research Institute. <http://www.pcori.org/> (accessed Jun 2016).
- Synthesis. <http://synthesis.info/>. Updated 2016.
- Cohen J. A coefficient of agreement for nominal scales. *Educ Psychol Meas* 1960;20:37–46.

# Protocol for a scoping review study to identify and classify patient-centred quality indicators

Rachel J Jolley, Diane L Lorenzetti, Kimberly Manalili, Mingshan Lu, Hude Quan and Maria J Santana

BMJ Open 2017 7:  
doi: 10.1136/bmjopen-2016-013632

---

Updated information and services can be found at:  
<http://bmjopen.bmj.com/content/7/1/e013632>

---

*These include:*

## References

This article cites 14 articles, 3 of which you can access for free at:  
<http://bmjopen.bmj.com/content/7/1/e013632#BIBL>

## Open Access

This is an Open Access article distributed in accordance with the Creative Commons Attribution Non Commercial (CC BY-NC 4.0) license, which permits others to distribute, remix, adapt, build upon this work non-commercially, and license their derivative works on different terms, provided the original work is properly cited and the use is non-commercial. See: <http://creativecommons.org/licenses/by-nc/4.0/>

## Email alerting service

Receive free email alerts when new articles cite this article. Sign up in the box at the top right corner of the online article.

---

## Topic Collections

Articles on similar topics can be found in the following collections

[Health services research](#) (1552)  
[Patient-centred medicine](#) (483)

---

## Notes

To request permissions go to:  
<http://group.bmj.com/group/rights-licensing/permissions>

To order reprints go to:  
<http://journals.bmj.com/cgi/reprintform>

To subscribe to BMJ go to:  
<http://group.bmj.com/subscribe/>

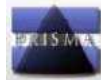

# PRISMA 2009 Checklist

| Section/topic                      | #  | Checklist item                                                                                                                                                                                                                                                                                              | Reported on page #  |
|------------------------------------|----|-------------------------------------------------------------------------------------------------------------------------------------------------------------------------------------------------------------------------------------------------------------------------------------------------------------|---------------------|
| <b>TITLE</b>                       |    |                                                                                                                                                                                                                                                                                                             |                     |
| Title                              | 1  | Identify the report as a systematic review, meta-analysis, or both.                                                                                                                                                                                                                                         | 1                   |
| <b>ABSTRACT</b>                    |    |                                                                                                                                                                                                                                                                                                             |                     |
| Structured summary                 | 2  | Provide a structured summary including, as applicable: background; objectives; data sources; study eligibility criteria, participants, and interventions; study appraisal and synthesis methods; results; limitations; conclusions and implications of key findings; systematic review registration number. | 2                   |
| <b>INTRODUCTION</b>                |    |                                                                                                                                                                                                                                                                                                             |                     |
| Rationale                          | 3  | Describe the rationale for the review in the context of what is already known.                                                                                                                                                                                                                              | 4                   |
| Objectives                         | 4  | Provide an explicit statement of questions being addressed with reference to participants, interventions, comparisons, outcomes, and study design (PICOS).                                                                                                                                                  | 4                   |
| <b>METHODS</b>                     |    |                                                                                                                                                                                                                                                                                                             |                     |
| Protocol and registration          | 5  | Indicate if a review protocol exists, if and where it can be accessed (e.g., Web address), and, if available, provide registration information including registration number.                                                                                                                               | 4                   |
| Eligibility criteria               | 6  | Specify study characteristics (e.g., PICOS, length of follow-up) and report characteristics (e.g., years considered, language, publication status) used as criteria for eligibility, giving rationale.                                                                                                      | 5                   |
| Information sources                | 7  | Describe all information sources (e.g., databases with dates of coverage, contact with study authors to identify additional studies) in the search and date last searched.                                                                                                                                  | 5                   |
| Search                             | 8  | Present full electronic search strategy for at least one database, including any limits used, such that it could be repeated.                                                                                                                                                                               | Supplemental file 1 |
| Study selection                    | 9  | State the process for selecting studies (i.e., screening, eligibility, included in systematic review, and, if applicable, included in the meta-analysis).                                                                                                                                                   | 5                   |
| Data collection process            | 10 | Describe method of data extraction from reports (e.g., piloted forms, independently, in duplicate) and any processes for obtaining and confirming data from investigators.                                                                                                                                  | 5                   |
| Data items                         | 11 | List and define all variables for which data were sought (e.g., PICOS, funding sources) and any assumptions and simplifications made.                                                                                                                                                                       | 5                   |
| Risk of bias in individual studies | 12 | Describe methods used for assessing risk of bias of individual studies (including specification of whether this was done at the study or outcome level), and how this information is to be used in any data synthesis.                                                                                      | N/A                 |
| Summary measures                   | 13 | State the principal summary measures (e.g., risk ratio, difference in means).                                                                                                                                                                                                                               | N/A                 |
| Synthesis of results               | 14 | Describe the methods of handling data and combining results of studies, if done, including measures of consistency (e.g., $I^2$ ) for each meta-analysis.                                                                                                                                                   | 6                   |

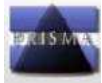

# PRISMA 2009 Checklist

Page 1 of 2

| Section/topic                 | #  | Checklist item                                                                                                                                                                                           | Reported on page # |
|-------------------------------|----|----------------------------------------------------------------------------------------------------------------------------------------------------------------------------------------------------------|--------------------|
| Risk of bias across studies   | 15 | Specify any assessment of risk of bias that may affect the cumulative evidence (e.g., publication bias, selective reporting within studies).                                                             | N/A                |
| Additional analyses           | 16 | Describe methods of additional analyses (e.g., sensitivity or subgroup analyses, meta-regression), if done, indicating which were pre-specified.                                                         | N/A                |
| <b>RESULTS</b>                |    |                                                                                                                                                                                                          |                    |
| Study selection               | 17 | Give numbers of studies screened, assessed for eligibility, and included in the review, with reasons for exclusions at each stage, ideally with a flow diagram.                                          | 6                  |
| Study characteristics         | 18 | For each study, present characteristics for which data were extracted (e.g., study size, PICOS, follow-up period) and provide the citations.                                                             | 7                  |
| Risk of bias within studies   | 19 | Present data on risk of bias of each study and, if available, any outcome level assessment (see item 12).                                                                                                | N/A                |
| Results of individual studies | 20 | For all outcomes considered (benefits or harms), present, for each study: (a) simple summary data for each intervention group (b) effect estimates and confidence intervals, ideally with a forest plot. | 7-11               |
| Synthesis of results          | 21 | Present results of each meta-analysis done, including confidence intervals and measures of consistency.                                                                                                  | N/A                |
| Risk of bias across studies   | 22 | Present results of any assessment of risk of bias across studies (see Item 15).                                                                                                                          | N/A                |
| Additional analysis           | 23 | Give results of additional analyses, if done (e.g., sensitivity or subgroup analyses, meta-regression [see Item 16]).                                                                                    | N/A                |
| <b>DISCUSSION</b>             |    |                                                                                                                                                                                                          |                    |
| Summary of evidence           | 24 | Summarize the main findings including the strength of evidence for each main outcome; consider their relevance to key groups (e.g., healthcare providers, users, and policy makers).                     | 13                 |
| Limitations                   | 25 | Discuss limitations at study and outcome level (e.g., risk of bias), and at review-level (e.g., incomplete retrieval of identified research, reporting bias).                                            | 14                 |
| Conclusions                   | 26 | Provide a general interpretation of the results in the context of other evidence, and implications for future research.                                                                                  | 14                 |
| <b>FUNDING</b>                |    |                                                                                                                                                                                                          |                    |
| Funding                       | 27 | Describe sources of funding for the systematic review and other support (e.g., supply of data); role of funders for the systematic review.                                                               | 15                 |

From: Moher D, Liberati A, Tetzlaff J, Altman DG, The PRISMA Group (2009). Preferred Reporting Items for Systematic Reviews and Meta-Analyses: The PRISMA Statement. PLoS Med 6(6): e1000097. doi:10.1371/journal.pmed1000097

For more information, visit: [www.prisma-statement.org](http://www.prisma-statement.org).

Page 2 of 2

For peer review only - <http://bmjopen.bmj.com/site/about/guidelines.xhtml>



# BMJ Open

## Measuring patient-centred system performance: A scoping review of patient-centred care quality indicators

|                                 |                                                                                                                                                                                                                                                                                                                                                                                                                                                                                                                                                                                                                     |
|---------------------------------|---------------------------------------------------------------------------------------------------------------------------------------------------------------------------------------------------------------------------------------------------------------------------------------------------------------------------------------------------------------------------------------------------------------------------------------------------------------------------------------------------------------------------------------------------------------------------------------------------------------------|
| Journal:                        | <i>BMJ Open</i>                                                                                                                                                                                                                                                                                                                                                                                                                                                                                                                                                                                                     |
| Manuscript ID                   | bmjopen-2018-023596.R1                                                                                                                                                                                                                                                                                                                                                                                                                                                                                                                                                                                              |
| Article Type:                   | Research                                                                                                                                                                                                                                                                                                                                                                                                                                                                                                                                                                                                            |
| Date Submitted by the Author:   | 11-Jul-2018                                                                                                                                                                                                                                                                                                                                                                                                                                                                                                                                                                                                         |
| Complete List of Authors:       | Santana, Maria-Jose; University of Calgary, Community Health Sciences; University of Calgary Cumming School of Medicine, Pediatrics<br>Ahmed, Sadia; University of Calgary Cumming School of Medicine, Pediatrics<br>Lorenzetti, Diane; University of Calgary, Community Health Sciences<br>Jolley, Rachel; University of Calgary, Community Health Sciences<br>Manalili, Kimberly; University of Calgary, Community Health Sciences<br>Zelinsky, Sandra; University of Calgary, PaCER Innovates<br>Quan, Hude; University of Calgary, Community Health Sciences<br>Lu, Mingshan ; University of Calgary, Economics |
| <b>Primary Subject Heading</b>: | Patient-centred medicine                                                                                                                                                                                                                                                                                                                                                                                                                                                                                                                                                                                            |
| Secondary Subject Heading:      | Health services research                                                                                                                                                                                                                                                                                                                                                                                                                                                                                                                                                                                            |
| Keywords:                       | Patient-centred care, Quality indicators, healthcare quality, quality improvement                                                                                                                                                                                                                                                                                                                                                                                                                                                                                                                                   |
|                                 |                                                                                                                                                                                                                                                                                                                                                                                                                                                                                                                                                                                                                     |

SCHOLARONE™  
Manuscripts

## Measuring patient-centred system performance: A scoping review of patient-centred care quality indicators

Maria J Santana,<sup>1,2\*</sup> Sadia Ahmed,<sup>2</sup> Diane L Lorenzetti,<sup>1,3</sup> Rachel J Jolley,<sup>1</sup> Kimberly Manalili,<sup>1</sup> Sandra Zelinsky,<sup>1</sup> Hude Quan,<sup>1</sup> Mingshan Lu<sup>1,4</sup>

<sup>1</sup> Department of Community Health Sciences, University of Calgary, Calgary, Alberta, Canada

Maria J Santana, Assistant Professor

Diane L Lorenzetti, Research Librarian

Rachel J Jolley, Research Associate

Kimberly Manalili, Research Associate

Sandra Zelinsky, Patient Research Partner

Hude Quan, Professor

Mingshan Lu, Professor

<sup>2</sup> Department of Pediatrics, Cumming School of Medicine, University of Calgary, Canada

Sadia Ahmed, Research Assistant

<sup>3</sup> Health Sciences Library, University of Calgary, Calgary, Alberta, Canada

Diane L Lorenzetti, Research Librarian

<sup>4</sup> Department of Economics, University of Calgary, Calgary, Alberta, Canada

Mingshan Lu, Professor

### \*Corresponding author:

**Maria J. Santana, PhD**

Email: [mjsantan@ucalgary.ca](mailto:mjsantan@ucalgary.ca)

Department of Pediatrics

Department of Community Health Sciences

Cumming School of Medicine, University of Calgary

TRW Building, 3rd Floor

3280 Hospital Drive NW

Calgary, Alberta CANADA T2N 4Z6

Phone: (403) 955-2783

Word Count: 2,844

Number of references: 49

Number of Figures: 1

Number of Tables: 4

## Abstract

**Objectives:** The shift to the patient-centred care model as a healthcare delivery paradigm calls for systematic measurement and evaluation. In an attempt to develop patient-centred quality indicators (PC-QIs), this study aimed to identify quality indicators that can be used to measure patient-centred care. The objective of this scoping review was to identify existing PC-QIs that have been developed and implemented across various care sectors.

**Search Strategy:** Studies were identified through searching 7 electronic databases and the grey literature. Search terms included: quality improvement, quality indicators, healthcare quality, patient-centred care. Articles were included if they mentioned development and/or implementation of PC-QIs.

**Results:** A total 184 full-text peer-reviewed articles were assessed for eligibility for inclusion; of these, nine articles were included in this review. From the non-peer-reviewed literature, eight documents met the criteria for inclusion in this study. This review revealed the heterogeneity describing and defining the nature of PC-QIs. Most PC-QIs were presented as patient-centred care (PCC) measures and identified as guidelines, surveys, or recommendations, and therefore cannot be classified as actual PC-QIs. Out of 502 ways to measure PCC, only 25 were considered to be actual PC-QIs. None of the identified articles implemented the quality indicators in care settings.

**Conclusion:** The identification of PC-QIs is a key first step in laying the groundwork to develop evidence-based PC-QIs. Research is needed to continue the development and implementation of PC-QIs for healthcare quality improvement.

**Keywords:** patient-centred care, quality indicator, healthcare quality, quality improvement

1  
2  
3  
4  
5  
6  
7  
8  
9  
10  
11  
12  
13  
14  
15  
16  
17  
18  
19  
20  
21  
22  
23  
24  
25  
26  
27  
28  
29  
30  
31  
32  
33  
34  
35  
36  
37  
38  
39  
40  
41  
42  
43  
44  
45  
46  
47  
48  
49  
50  
51  
52  
53  
54  
55  
56  
57  
58  
59  
60

Strengths

- Transparent and rigorous search strategy
- Involvement of patient partner in the study
- Study informed by a previously published protocol<sup>9</sup>

Limitations

- Search strategy using only English terms
- We did not assess the quality of the measures and/or indicators identified

For peer review only

## INTRODUCTION

Patient-centred care (PCC) is one of the six dimensions of healthcare and was formally described by the Institute of Medicine in 2001 as “*healthcare that respects and responds to the preferences, needs and values of the individual patients throughout all healthcare decisions*”.<sup>1</sup> PCC is an approach that has become central to policies and programming to improve healthcare efficiencies and address patient safety issues.<sup>2</sup>

PCC is a model in which healthcare providers are encouraged to partner with patients and families to design and deliver individualized care. PCC models have been linked to positive patient experiences and improved outcomes, such as increased adherence to care and treatment.<sup>3-5</sup> A PCC approach not only benefits patients, but also healthcare organizations in reducing costs, for instance through decreasing the length of hospital stays and readmission rates.<sup>6,7</sup> However, patient-centred care is conceptualized differently among different stakeholders, impacting effective implementation in care settings.<sup>8</sup> The adoption of a PCC model requires first, the identification of appropriate indicators to measure the quality of PCC, and second, the assessment of the impact of delivering PCC on healthcare system and patient outcomes.<sup>9</sup>

Quality indicators are tools that measure system performance and healthcare quality, and demonstrate the extent to which improvement efforts have led to desirable change, or contributed to unintended results.<sup>10</sup> As identified from the Agency for Healthcare Research and Quality (AHRQ), a quality indicator consists of: a specific aspect of quality being captured, and a method for how concepts of quality are captured (which includes: data source, measure type, observable event, specification and risk adjustment).<sup>11</sup> While various quality indicators have been developed to measure healthcare safety, effectiveness and access,<sup>12</sup> they typically do not incorporate the priorities and experiences of patients and family caregivers. To truly evaluate the impact of patient-centredness, indicators must reflect the patient and family caregiver perspective.

This scoping review aimed to synthesize existing literature on quality indicators used in the evaluation of patient-centred care. This review was guided by the questions: “What PC-QIs have been developed to measure patient centred care?” “How are patient-centred quality indicators defined?” and “Have existing patient-centred quality indicators been implemented and evaluated across various points-of-care settings, processes of care, and at the systems level to measure patient-centred care?” The information gained from this study will inform the development of patient-centred care quality indicators that could be implemented to drive healthcare improvement valued by patients and families.

## METHODS

We employed a scoping review protocol that was previously published,<sup>13</sup> using methodology based on Arksey and O’Malley’s scoping review framework<sup>14</sup> and Levac *et al.*’s methodological enhancement.<sup>15</sup> We searched the peer-reviewed published and grey literature for either proposed or existing quality indicators that have been developed and/or implemented across various points-of-care settings to measure patient-centred

1  
2  
3 care. For this scoping review, the Agency for Healthcare Research & Quality (AHRQ)<sup>16</sup>  
4 definition of a quality indicator was adapted to incorporate a patient and family focus.  
5 Specifically, a patient-centred quality indicator (PC-QI) was defined as the unit of  
6 measurement of healthcare system, organizational or individual performance, that  
7 quantify patients' and families' experiences with the care received and quantify the  
8 experience of any individual who needs to contact with healthcare services." In contrast,  
9 PCC measures are in the form of a survey, guideline, or recommendation.  
10  
11  
12

### 13 **Data sources and search strategy**

14  
15 In order to identify studies assessing quality indicators for patient-centred care, search  
16 strategies were developed that combined terms from two concepts: patient-centred care  
17 and quality indicators (supplemental file 1). The Cochrane Library, the Cumulative Index  
18 to Nursing and Allied Health Literature (CINAHL), EMBASE, MEDLINE, PsycINFO,  
19 Social Services Abstracts, and Social Work Abstracts were searched from inception to  
20 January 2017. A search of the Google search engines, and the websites of relevant quality  
21 improvement and patient-centric organizations enabled the identification of relevant grey  
22 literature. Grey literature searches were conducted in duplicate by both a researcher and  
23 patient partner. The reference lists of included studies were also scanned to identify any  
24 other studies of relevance.  
25  
26  
27  
28

### 29 **Citation management**

30  
31 All references were imported into a custom-written Java software application, Synthesis  
32 for reference management and data collection.<sup>17</sup> Duplicate citations were removed  
33 automatically by the software, with any mismatched duplicates removed manually if  
34 detected.  
35  
36  
37

### 38 **Study selection and data abstraction**

39  
40 To be eligible for inclusion, the study/article had to 1) identify quality indicators for PCC  
41 and/or 2) identify PC-QI in performance measurement (e.g., validation). The title and  
42 abstract of each citation identified was screened for eligibility independently by two  
43 reviewers (MJS, ML). The full-text of any abstract selected by either reviewer was  
44 retrieved and assessed for eligibility. Any full-text articles for which there was inter-rater  
45 discord were reviewed a second time, and final disagreements about study eligibility  
46 were resolved through discussion.  
47  
48

### 49 **Data collection and Classification of Indicators**

50  
51 A data collection tool was developed and tested on a sample of papers to determine its  
52 practicality prior to the full review (supplemental file 2). Extracted data included study  
53 characteristics (country, year of publication, type of study/article), patients' inclusion in  
54 the development of indicators, and type of patient populations and point of care if  
55 applicable (e.g. in-patient, out-patient, primary care).  
56  
57  
58  
59  
60

1  
2  
3  
4 All extracted indicators were classified by two authors (MS, SA) according to a person-  
5 centred care framework<sup>18</sup> developed by the team and guided by the Donabedian model of  
6 quality of care.<sup>19</sup> This framework provides a roadmap for healthcare systems to  
7 implement and measure PCC at the level of structure (the health care  
8 system/organizational level); process (the patient-healthcare provider interaction level),  
9 and outcome (the patient-health care provider, healthcare systems interaction level).<sup>18</sup>  
10  
11

### 12 **Patient Involvement**

13 Levac et al, recommends the involvement of stakeholders in the scoping review  
14 methodology.<sup>15</sup> We worked closely with our patient-research partner (SZ) in the design  
15 of the study who also aided in the search strategy. Our patient research partner aided in  
16 the clarification of research questions as well. The involvement of patient research  
17 partners allows for suggestions of additional references as well as the provision of  
18 insights beyond those in the literature.<sup>15</sup> The involvement of patients is key to patient  
19 centred care, and therefore our patient-research partner was vital for this review.  
20  
21

## 22 **RESULTS**

23  
24  
25 A total of 36,643 citations were retrieved, and upon duplicate removal, a total of 16,173  
26 citations were reviewed at the title and abstract stage for inclusion (Figure 1). A total 184  
27 full-text peer-reviewed articles were assessed for eligibility for inclusion; of these, nine  
28 articles were included in this review (Figure 1). From the non- peer-reviewed literature,  
29 following the title and document review, eight documents met the criteria for inclusion in  
30 this study (Figure 1). The most common reason for excluding articles (n=15,905) was the  
31 absence of indicators for PCC.  
32  
33

### 34 **Article Description**

35  
36  
37 Table 1 presents the characteristics of the full text articles included in the study. The  
38 years of publication ranged from 1996 to 2015. Included studies were published in  
39 Belgium (n=1), United States of America (n=2), Canada (n=3), United Kingdom (n=4),  
40 the Netherlands (n=4), and three sources did not include a country of publication. Sources  
41 were varied and included original peer reviewed research (n=8), guest editorial (n=1),  
42 reports (n=4), discussion paper (n=1), working paper (n=1), literature review (n=1), and a  
43 website (n=1). The study populations varied in the peer reviewed literature (e.g., cancer,  
44 fertility care, HPN, etc.) and no specific populations were identified in the non-peer  
45 reviewed literature.  
46  
47  
48  
49

50 “What PC-QIs have been developed to measure patient centred care?”  
51

52  
53 From the sources included, a total of 502 ways of measuring PCC were explicitly  
54 identified as quality indicators by studies’ authors. However only 25 were classified as  
55 actual indicators by our research team.  
56  
57  
58  
59

PCC measurement varied between articles. While all sources used the term ‘quality indicator’, not all were quantifiable and measurable. Most sources presented quality indicators as guidelines or recommendations for healthcare practitioners. Wensing *et al.* presented indicators as survey items, such as “Does the GP pay attention to patients’ needs?”<sup>20</sup> Actual indicators were presented as percentages and proportions, and identified from six grey literature sources.<sup>21-26</sup> For instance, one study outlined an example of a structure indicator - “Percent of nurses attending education sessions (orientation, organization professional development opportunities) on client centred care.”<sup>25</sup>

Study populations included cancer patients (n=2), colonoscopy patients (n=1), home parenteral nutrition patients (HPN) (n=1), chronically ill (n=1), fertility care (n=1), and assisted living support patients (n=1) (Table 1). For the development of PCC measures, seven studies used focus groups, interviews, and/or consensus meetings, ten studies included patients and family caregivers in the development of PCC measures, and one article developed measures through the authors’ clinical and research work. Two sources developed ways to measure PCC from patient reported experience surveys,<sup>24 27</sup> and two studies used a framework.<sup>25 28</sup>

Some studies grouped ways to measure PCC according to domains of patient-centred care that were based on previously defined frameworks or through consensus (e.g., access to care, communication and information). Domains identified from the person-centred care framework are categorized according to structure, process, and outcome.<sup>18</sup> Table 2 presents examples of measuring PCC classified according to the person-centred care framework,<sup>18</sup> and Table 3 presents the actual indicators classified according to the same framework.<sup>18</sup>

**Table 1. Characteristics of Articles on Patient-Centred Quality Indicators**

| Study identifier (first author)         | Country     | Year | Study Type                                          | Population                               | Patients involved | Number of Indicators & ways to measure PCC |
|-----------------------------------------|-------------|------|-----------------------------------------------------|------------------------------------------|-------------------|--------------------------------------------|
| <b>Peer reviewed literature (n=9)</b>   |             |      |                                                     |                                          |                   |                                            |
| den Breejen <i>et al.</i> <sup>29</sup> | Netherlands | 2013 | Focus groups/interviews/consensus meetings          | Fertility care                           | Yes               | 34                                         |
| Dreesen <i>et al.</i> <sup>30</sup>     | Belgium     | 2014 | Focus groups/interviews/consensus meetings;         | Home parenteral nutrition (HPN) patients | Yes               | 33                                         |
| Ouwens <i>et al.</i> <sup>31</sup>      | Netherlands | 2010 | Focus groups/interviews/consensus meetings;         | Cancer- Non-small cell lung carcinoma    | Yes               | 54                                         |
| Sewitch <i>et al.</i> <sup>32</sup>     | Canada      | 2013 | Focus groups/interviews/consensus meetings; Surveys | Colonoscopy patients - adult             | Yes               | 20                                         |



|                                                                                         |                |      |                                                     |                                                                                                                                                   |     |     |
|-----------------------------------------------------------------------------------------|----------------|------|-----------------------------------------------------|---------------------------------------------------------------------------------------------------------------------------------------------------|-----|-----|
| Uphoff et al. <sup>33</sup>                                                             | Netherlands    | 2012 | Focus groups/interviews/consensus meetings          | Cancer                                                                                                                                            | Yes | 21  |
| Wensing et al. <sup>20</sup>                                                            | Netherlands    | 1996 | Focus groups/interviews/consensus meetings; Surveys | Chronically ill patients (chronic obstructive pulmonary disease, diabetes, cardiovascular disease, migraine, chronic disease of locomotor system) | Yes | 41  |
| Zimmerman et al. <sup>34</sup>                                                          | USA            | 2014 | Focus groups/interviews/consensus meetings          | Community-based, assisted living support patients                                                                                                 | Yes | 43  |
| Cox et al. <sup>35</sup>                                                                | United Kingdom | 2014 | Guest editorial                                     | -                                                                                                                                                 | -   | 4   |
| Carinci et al. <sup>28</sup>                                                            | United Kingdom | 2015 | Modified Delphi approach/consensus meeting          | -                                                                                                                                                 | -   | 12  |
| <b>non-peer reviewed Literature (n=8)</b>                                               |                |      |                                                     |                                                                                                                                                   |     |     |
| Steven Lewis <sup>26</sup>                                                              | Canada         | 2009 | Discussion paper                                    | -                                                                                                                                                 | -   | 6   |
| RNAO <sup>25</sup>                                                                      | Canada         | 2002 | Guidelines document/report                          | -                                                                                                                                                 | -   | 18  |
| Silow-Carroll et al. <sup>36</sup>                                                      | USA            | 2006 | Report                                              | -                                                                                                                                                 | -   | 6   |
| Kelley & Hurst (OECD) <sup>24</sup>                                                     | -              | 2006 | Working papers                                      | -                                                                                                                                                 | Yes | 7   |
| OECD <sup>27</sup>                                                                      | -              | 2006 | OECD website                                        | -                                                                                                                                                 | Yes | 8   |
| Essence of Care- Patient Focused benchmarks for clinical governance (NHS) <sup>22</sup> | United Kingdom | 2003 | Report                                              | -                                                                                                                                                 | Yes | 116 |
| Davies et al. <sup>23</sup>                                                             | United Kingdom | 2009 | Report                                              | -                                                                                                                                                 | -   | 10  |
| IAPO <sup>21</sup>                                                                      | -              | 2012 | Literature review                                   | -                                                                                                                                                 | -   | 69  |

PCC, Patient-Centred Care

OECD, Organization for Economic Co-operation and Development

NHS, National Health Services

RNAO, Registered Nurses Association Ontario

IAPO, International Alliance of Patients' Organizations

**Table 2. Examples of PCC measurement classified according to the person-centred care framework.<sup>18</sup>**

| PCC Measure Classification | Domain                                                         | Example of ways to measure PCC                                                                                                                                                                                                                                                                                                                                                                   |
|----------------------------|----------------------------------------------------------------|--------------------------------------------------------------------------------------------------------------------------------------------------------------------------------------------------------------------------------------------------------------------------------------------------------------------------------------------------------------------------------------------------|
| Structure (n=80)           | Supporting a workforce committed to Patient-Centred Care (PCC) | <ul style="list-style-type: none"> <li>The development needs of health care personnel are met by ongoing review through supervision, appraisal and individual development plans<sup>22</sup></li> <li>All staff and volunteers can articulate person-centred principles and practices applicable to their role(s) and demonstrate their implementation<sup>34</sup></li> </ul>                   |
|                            | Providing a supportive and accommodating PCC environment       | <ul style="list-style-type: none"> <li>Residents have a choice of a private room<sup>34</sup></li> <li>Patient satisfaction survey translated into Spanish<sup>35</sup></li> </ul>                                                                                                                                                                                                               |
| Process (n=343)            | Cultivating Communication                                      | <ul style="list-style-type: none"> <li>(Regular) doctor involving patients in decisions about care or treatment<sup>27</sup></li> <li>Making use of open-ended questions in a conversation with the patient<sup>33</sup></li> <li>Patient had the knowledge and support to make decisions<sup>31</sup></li> <li>Regular doctor providing easy-to-understand explanations<sup>28</sup></li> </ul> |
|                            | Respectful and compassionate care                              | <ul style="list-style-type: none"> <li>Patient received emotional support from nurses if needed<sup>31</sup></li> <li>Giving confidence to the patient<sup>30</sup></li> <li>Does the GP pay attention to patients' needs?<sup>20</sup></li> </ul>                                                                                                                                               |
| Outcome (n=79)             | Patient-Reported Outcomes (PROs)                               | <ul style="list-style-type: none"> <li>Measures are in place to assess and provide feedback on the interpersonal skills of health care personnel<sup>22</sup></li> <li>Regarding infertility treatment, patients would like to see all members of the infertility treatment team following the same policy<sup>29</sup></li> </ul>                                                               |

**Table 3. Identified Patient Centred Quality Indicators from the literature classified according to the person-centered care framework as actual indicators<sup>18</sup>**

| Type of Indicator | Domain                 | PCC Indicators (n=25)                                                                                                                                                                                                                                                                                                                                                                                                   |
|-------------------|------------------------|-------------------------------------------------------------------------------------------------------------------------------------------------------------------------------------------------------------------------------------------------------------------------------------------------------------------------------------------------------------------------------------------------------------------------|
| Structure         | Creating a PCC Culture | <ul style="list-style-type: none"> <li>An induction programme is in place which promotes the philosophy of care<sup>22</sup></li> <li>% of PHC organizations who currently have processes to involve community input for planning the organization's services (e.g. advisory committees, focus groups<sup>21</sup></li> <li>Clear policies are in place on how services are offered to patients<sup>21</sup></li> </ul> |

|         |                                          |                                                                                                                                                                                                                                                                                                                                                                                                                                                                                                                                                                                                                                                                                                                                                                                                                         |
|---------|------------------------------------------|-------------------------------------------------------------------------------------------------------------------------------------------------------------------------------------------------------------------------------------------------------------------------------------------------------------------------------------------------------------------------------------------------------------------------------------------------------------------------------------------------------------------------------------------------------------------------------------------------------------------------------------------------------------------------------------------------------------------------------------------------------------------------------------------------------------------------|
|         | Supporting a workforce committed to PCC  | <ul style="list-style-type: none"> <li>• Percent of nurses attending education sessions (orientation, organization professional development opportunities) on client centred care<sup>25</sup></li> <li>• Percent of non-nursing staff attending education sessions (orientation, organization professional development opportunities) on client centred care<sup>25</sup></li> </ul>                                                                                                                                                                                                                                                                                                                                                                                                                                   |
| Process | Cultivating Communication                | <ul style="list-style-type: none"> <li>• % of patients with access to an on-line HER a) By region b) By practice<sup>26</sup></li> <li>• Proportion of service users who stated that the district nurse provided health advice or information about his/her condition<sup>23</sup></li> <li>• Proportion of service users who stated that they were involved as much as they wanted to be in decisions about their care and treatment<sup>23</sup></li> </ul>                                                                                                                                                                                                                                                                                                                                                           |
|         | Respectful and compassionate care        | <ul style="list-style-type: none"> <li>• Proportion of service users who stated that their district nurse treated them with respect and dignity<sup>23</sup></li> <li>• % of inpatients who said they were always treated with respect and dignity while in hospital/primary care<sup>21</sup></li> </ul>                                                                                                                                                                                                                                                                                                                                                                                                                                                                                                               |
|         | Engaging patients in managing their care | <ul style="list-style-type: none"> <li>• % of PHC clients/patients, 18 years and over, with a chronic condition(s), who actively participated in the development of a treatment plan with their PHC provider over the past 12 months<sup>21</sup></li> <li>• % of hospital patients who said they had been sufficiently involved in decisions about their care as much as they wanted to be<sup>21</sup></li> <li>• Percent of nurses self-reporting: Adequate assessment of a client's perceived needs for care, adequate assessment of a client's goals for care, adequate documentation of a client's personal goals for care, sharing client's concerns/choices with other members of the health care team, discharge teaching guided by the client's goals for managing their care at home<sup>25</sup></li> </ul> |
|         | Integration of Care                      | <ul style="list-style-type: none"> <li>• % of hospital patients taking medicines home after discharge who were told completely about the purposes of the medicine in a way they could understand<sup>21</sup></li> </ul>                                                                                                                                                                                                                                                                                                                                                                                                                                                                                                                                                                                                |
|         | Access to Care                           | <ul style="list-style-type: none"> <li>• % of patients who can get all diagnostic work ordered by their primary care doctor done the same day in the same location (excluding certain</li> </ul>                                                                                                                                                                                                                                                                                                                                                                                                                                                                                                                                                                                                                        |

|         |                                      |                                                                                                                                                                                                                                                                                                                                                                                                                                                                                                                                                                                                                                                                                                                                                                                                                                                                                                                             |
|---------|--------------------------------------|-----------------------------------------------------------------------------------------------------------------------------------------------------------------------------------------------------------------------------------------------------------------------------------------------------------------------------------------------------------------------------------------------------------------------------------------------------------------------------------------------------------------------------------------------------------------------------------------------------------------------------------------------------------------------------------------------------------------------------------------------------------------------------------------------------------------------------------------------------------------------------------------------------------------------------|
|         |                                      | <p>high-technology procedures such as CT and MRI)<sup>26</sup></p> <ul style="list-style-type: none"> <li>• Percentage of outpatients seen within 13 weeks of GP referral<sup>24</sup></li> <li>• Percentage of those on waiting list waiting 12 months or more<sup>24</sup></li> <li>• Proportion of service users who were able to contact a district nurse when needed, including outside of normal working hours<sup>23</sup></li> <li>• The percentage of patients who, in the appropriate national survey, indicate that they were able to obtain a consultation with a GP or appropriate health care professional within 2 working days (NHS Confederation, UK)<sup>21</sup></li> <li>• % of PHC clients/patients, 18 years and over, with a chronic condition(s), who had sufficient time in most visits to confide their health-related feelings, fears and concerns to their PHC provider<sup>21</sup></li> </ul> |
| Outcome | Patient-Reported Experiences (PREMs) | <ul style="list-style-type: none"> <li>• Proportion of service users who stated that the district nurse had all the necessary information about the service user and his/ her health needs<sup>23</sup></li> <li>• Proportion of service users who stated that the district nurse had all the equipment and dressings needed<sup>23</sup></li> <li>• Proportion of service users who stated that the district nurse was knowledgeable and competent<sup>23</sup></li> <li>• Proportion of service users who rated the district nurse service as very good or excellent<sup>23</sup></li> <li>• Proportion of children whose parents routinely received all aspects of family centred care (Child and Adolescent Health Measurement Initiative)<sup>21</sup></li> </ul>                                                                                                                                                      |

PHC, Primary Healthcare  
 HER, Health Electronic Record  
 CT, Computed Tomography  
 MRI, Magnetic Resonance Imaging  
 GP, General Practitioner  
 NHS, National Health Services  
 UK, United Kingdom

### How are patient-centred quality indicators defined?

The definition of a PC-QI was not clearly articulated in the studies identified (Table 4). Ten of the included studies provided no such definition of a quality indicator (Table 4). Sources where the definition of a quality indicator was mentioned defined indicators as something to be measured, and developed through consensus (Table 4).<sup>23 30 31 33</sup> Of those four sources where the definition of a PC-QI was clear, two included actual indicators.<sup>21</sup>

<sup>23</sup> The National Health Services (2003) report described indicators as ‘items that patients, carers and professionals believed were important in achieving the benchmarks of best practice.’<sup>22</sup>

### **Have the existing patient-centred quality indicators been implemented and evaluated across various points-of-care settings, processes of care and at the system level to measure patient-centred care?**

None of the articles mentioned actual implementation of indicators in the settings for which they were developed. Similarly, many of the sources (15/17) did not evaluate the indicators according to any set criteria. The two studies that did evaluate indicators, used two different approaches.<sup>28 31</sup> The study by Ouwens *et al.* assessed guidelines for psychometric characteristics and only 26 out of 56 guidelines were found to be reliable.<sup>31</sup> The study by Carinci *et al.* used a modified Delphi approach with expert Organization for Economic Co-operation and Development (OECD) members to rate the PCC measures, using validity, reliability, relevance, actionability, international feasibility, and international comparability as the criteria.<sup>28</sup> Uphoff *et al.*, recommended using the Gol & Grimshaw model for evaluating indicators,<sup>33</sup> while a future direction for Zimmerman *et al.* was the evaluation of the indicators.<sup>34</sup> The working paper by Kelley and Hurst presented criteria that can be used to select indicators.<sup>24</sup> These included the importance of what is being measured (which includes policy importance), scientific soundness, and feasibility of the measure.<sup>24</sup>

Table 4. Definition of quality indicator used by authors

| Study Identifier (First Author, year)                                                                                                                                                                                                                                                                                                                                                                                                                                      | Definition of quality indicator used                                                                                                                                                                              |
|----------------------------------------------------------------------------------------------------------------------------------------------------------------------------------------------------------------------------------------------------------------------------------------------------------------------------------------------------------------------------------------------------------------------------------------------------------------------------|-------------------------------------------------------------------------------------------------------------------------------------------------------------------------------------------------------------------|
| (den Breejen <i>et al.</i> , 2013), <sup>29</sup> (Sewitch <i>et al.</i> , 2013), <sup>32</sup> (Uphoff <i>et al.</i> , 2012), <sup>33</sup> (Zimmerman <i>et al.</i> , 2014), <sup>34</sup> (Cox <i>et al.</i> , 2014), <sup>35</sup> (Lewis, 2009), <sup>26</sup> (RNAO, 2002), <sup>25</sup> (Silow-Carroll <i>et al.</i> , 2006), <sup>36</sup> (Kelley & Hurst, 2006), <sup>24</sup> (OECD website, 2006), <sup>27</sup> (Carinci <i>et al.</i> , 2015) <sup>28</sup> | Definition not included                                                                                                                                                                                           |
| (Dreesen <i>et al.</i> , 2014) <sup>30</sup>                                                                                                                                                                                                                                                                                                                                                                                                                               | A quality indicator as a measurable element of practice performance for which there is evidence or consensus that it can be used to assess the quality of care, and hence change the care provided. <sup>37</sup> |
| (Ouwens <i>et al.</i> , 2010) <sup>31</sup> (Uphoff <i>et al.</i> , 2012) <sup>33</sup>                                                                                                                                                                                                                                                                                                                                                                                    | Quality indicators are ‘measurable elements of practice performance for which there is evidence or consensus that they can be used to assess the quality of care’ <sup>38</sup>                                   |
| (Davies <i>et al.</i> , 2009) <sup>23</sup>                                                                                                                                                                                                                                                                                                                                                                                                                                | An explicit measurable statement of the quality of care given. Relates to a single                                                                                                                                |

|                            |                                                                                                                                                                                                                            |
|----------------------------|----------------------------------------------------------------------------------------------------------------------------------------------------------------------------------------------------------------------------|
|                            | outcome or process of medical care. Clearly defined and unambiguous. <sup>38 39</sup>                                                                                                                                      |
| (NHS, 2003) <sup>22</sup>  | Items that patients, carers and professionals believed were important in achieving the benchmarks of best practice. <sup>22</sup>                                                                                          |
| (IAPO, 2012) <sup>21</sup> | Can be measures of structure, process and outcome, either as generic measures relevant for all diseases, or disease-specific measures that describe quality of patient care related to a specific diagnosis. <sup>40</sup> |

OECD, Organization for Economic Cooperation and Development

NHS, National Health Services

IAPO, International Alliance of Patients' Organizations

## DISCUSSION

This review specifically examined existing patient centred care quality indicators in the academic and grey literature. Patient-centred care has been increasingly adopted by many jurisdictions, however this review revealed there to be gaps in the conceptualization of patient-centred quality indicators. Out of the 17 articles that met the inclusion criteria, only 9 were peer reviewed, and looked at specific conditions. Additionally, the heterogeneity of the PCC literature relates to the variety of definitions on PC-QIs, and a diverse type of indicators developed for different patient population and care-settings. For instance, all included articles in the review used the term 'indicator,' but not all presented actual indicators as defined by the Agency for Healthcare Research & Quality (AHRQ).<sup>16</sup>

The absence of a standard definition of what a PC-QI is in the literature has posed challenges in identifying the literature sources for inclusion in this review. 'Quality' means different things to different people, and despite the standard definition of PCC by the Institute of Medicine,<sup>1</sup> PCC continues to be operationalized and measured differently.<sup>41</sup> Most sources identified in the literature did not explicitly define what a quality indicator is, which may explain the differences in approaches to indicator development. The absence of a definition for quality indicators results in inconsistencies for how an indicator should be presented and also what makes for a good indicator. Previous reviews have also found variability in quality indicator definitions, such as indicators for hip fracture patient care.<sup>42</sup> The absence of a standard definition of PC-QIs poses concerns for standardized measurement of PCC, and for implementation of PC-QIs in healthcare settings.

In compliance with quality improvement agencies, quality councils and organizations such as the AHRQ, quality indicators should be presented as a unit of measurement - as a percentage or proportion.<sup>16</sup> Our review revealed inconsistencies in the definition of indicators. Only few sources in the non-peer reviewed literature included PC-QIs as quantifiable units, such as percentages, incorporating a numerator and denominator in the unit of measurement.<sup>43</sup> Most of the identified indicators were actually domains included in PCC measures and guidelines. The lack of defined units of measurement impedes

1  
2  
3 comparisons across facilities, and benchmarking, and doesn't allow for longitudinal  
4 evaluation and overall measurement of care that is patient-centred. Without this unit of  
5 measurement for PC-QIs, it is difficult to target specific improvements needed for PCC.  
6

7  
8 The review revealed that when incorporating the patient and caregiver perspective in  
9 quality improvement, a difficulty exists in translating perceptions and subjective  
10 experiences into standardized objective indicators. Measures of well-being are both  
11 necessary and important to incorporating a PCC model of care. The study by Carr *et al.*  
12 suggests that perceptions of health and its meaning vary between individuals and across  
13 time, as do their experiences and expectations of healthcare.<sup>44</sup> In order to capture various  
14 perspectives on quality care, it is vital to include patients and families. Including the  
15 patient and family perspective is necessary to ensure quality patient-centred care.  
16  
17

18 Additionally, this review found large variances for domains to categorize approaches to  
19 measuring PCC. In an attempt to organize our findings and understand the ways of  
20 measuring PCC, we used a previously published person-centered care framework<sup>18</sup> to  
21 classify them into healthcare quality domains. From this classification, most strategies for  
22 measuring PCC were found to relate to domains associated with healthcare processes  
23 (e.g. cultivating communication). These findings are consistent with the current  
24 measurement landscape, for instance trauma indicators,<sup>45</sup> and AHRQ PC-QIs<sup>46</sup> which  
25 mainly assess processes and outcomes. For PCC, structures, such as policies and  
26 education programs can provide an important basis to improve PCC practice.<sup>18 47</sup>  
27 Structure indicators provide the necessary foundations for the assessment of process and  
28 outcome indicators, for instance through creating a PCC culture, supporting the  
29 workforce to deliver PCC, and providing an accommodating environment for patients.<sup>18</sup>  
30 In this review, structure indicators were lacking.  
31  
32  
33

34 Finally, there is scarce evidence in the literature on how to implement indicators for PCC,  
35 and how to evaluate their implementation. PCC measurement has, to date, primarily  
36 focused on specific disease conditions and healthcare sectors. However, recent initiatives,  
37 (National Health Services) reveal a more generic approach to measurement (Family and  
38 Friend Test).<sup>48</sup> In order to create a standardized set of PC-QIs, indicators must be  
39 developed across the continuum of care. Santana & Stelfox. also found a lack of  
40 implementation of indicators in care settings in their review.<sup>45</sup> Before indicators are  
41 implemented, they must be evaluated according to standard set criteria. What constitutes  
42 as a good indicator has been outlined by health quality organizations, such as National  
43 Quality Forum. As outlined by the National Quality Forum, quality indicators should be  
44 evaluated through a set criteria including: importance, scientific acceptability, feasibility,  
45 and usability and use.<sup>49</sup> Our review did not identify any studies where such evaluations  
46 were implemented. In the development and implementation of quality indicators, the  
47 guideline set by the National Quality Forum should be adhered to.  
48  
49  
50

51 The gaps identified in the literature for patient-centred quality indicators provide  
52 directions for future research. First, there needs to be consensus on a standard definition  
53 of patient-centred quality indicator to guide future measurement of patient-centred care.  
54 Second, there needs to be development of standard PC-QIs for all healthcare settings.  
55  
56  
57  
58  
59



1  
2  
3 Third, PC-QIs need to be evaluated according to a set criteria. Lastly, PC-QIs need to be  
4 implemented across healthcare settings for monitoring and evaluation of PCC.  
5

### 6 7 **Strengths and Limitations**

8 Our scoping review used robust and transparent methods guided by a protocol previously  
9 published,<sup>13</sup> and supported by a research librarian with expertise in knowledge synthesis  
10 and scoping reviews (DLL). We worked closely with our patient research partner (SZ) in  
11 the study design, research questions, search strategy and manuscript preparation.  
12

13 This review may not have identified all relevant sources in the published and grey  
14 literature as we conducted the search using only English terms. As we are following the  
15 scoping review methodology, the quality of the studies was not assessed. Therefore,  
16 indicators from weak and strong studies is considered.  
17  
18

### 19 20 **Conclusions**

21 In summary, our review is the first to examine the literature pertaining to quality  
22 indicators that are patient-centric. Our findings will further the development of validated  
23 healthcare tools assessing healthcare quality from a patient-centred approach. Future  
24 research should focus on developing and refining PC-QIs that are ready to implement and  
25 evaluate following the criteria set forth by the National Quality Forum.<sup>49</sup>  
26  
27  
28  
29

### 30 31 **Figure 1. Flow Diagram for study inclusion**

32  
33  
34 **Acknowledgements:** We would like to acknowledge the contributions of Ms. Lisa  
35 Goodman, who provided support for the grey literature search for this scoping review.  
36  
37  
38

39 Data sharing: no additional data available  
40  
41  
42  
43

### 44 45 **Details of contributors:**

46 MJS conceived the study, and all authors identified key literature to be included in the  
47 review. MJS led the drafting of the manuscript and key discussion points with support  
48 from DL, RJJ, SA, ML and KM. SA managed the design of the tables (with feedback  
49 from all authors), and management of references. All authors provided important  
50 intellectual contribution and guidance throughout the development of the manuscript.  
51 HQ, DL, SZ, and ML provided guidance on the presentation of the findings and guidance  
52 on final revisions. All of the authors contributed to critical review and revisions to the  
53 manuscript, agreeing on the final version.  
54

### 55 56 **Funding:**

1  
2  
3 Dr. Santana secured funding from the M.S.I Foundation (Grant #886) based in Alberta,  
4 Canada. Dr. Lu acknowledges the support from the Alberta's Strategy for Patient  
5 Oriented Research (SPOR).  
6  
7

8 **Competing interests:** All authors have completed the ICMJE uniform disclosure form at  
9 [www.icmje.org/coi\\_disclosure.pdf](http://www.icmje.org/coi_disclosure.pdf) and declare: no support from any organisation for the  
10 submitted work; no financial relationships with any organisations that might have an  
11 interest in the submitted work in the previous three years; and no other relationships or  
12 activities that could appear to have influenced the submitted work  
13  
14

15 All authors had access to the data (literature identified and tables) in the study and  
16 assume responsibility for the integrity of the data and the accuracy of the data analysis.  
17  
18

19 The lead author\* affirms that this manuscript is an honest, accurate, and transparent  
20 account of the study being reported; that no important aspects of the study have been  
21 omitted; and that any discrepancies from the study as planned (and, if relevant,  
22 registered) have been explained.  
23  
24

25 The Corresponding Author has the right to grant on behalf of all authors and does grant  
26 on behalf of all authors, a worldwide licence to the Publishers and its licensees in  
27 perpetuity, in all forms, formats and media (whether known now or created in the future),  
28 to i) publish, reproduce, distribute, display and store the Contribution, ii) translate the  
29 Contribution into other languages, create adaptations, reprints, include within collections  
30 and create summaries, extracts and/or, abstracts of the Contribution, iii) create any other  
31 derivative work(s) based on the Contribution, iv) to exploit all subsidiary rights in the  
32 Contribution, v) the inclusion of electronic links from the Contribution to third party  
33 material where-ever it may be located; and, vi) licence any third party to do any or all of  
34 the above  
35  
36  
37  
38  
39  
40  
41  
42  
43  
44  
45  
46  
47  
48  
49  
50  
51  
52  
53  
54  
55  
56  
57  
58  
59  
60

## References

1. Institute of Medicine. Crossing the quality chasm: a new health system for the 21st century. *National Academy Press* 2001.
2. Doyle C, Lennox L, Bell D. A systematic review of evidence on the links between patient experience and clinical safety and effectiveness. *BMJ open* 2013;**3**(1):e001570.
3. Oates J, Weston WW, Jordan J. The impact of patient-centered care on outcomes. *Fam Pract* 2000;**49**:796-804.
4. Fung CH, Lim Y-W, Mattke S, et al. Systematic Review: The Evidence That Publishing Patient Care Performance Data Improves Quality of CareThe Impact of Publishing Performance Data on Quality of Care. *Annals of internal medicine* 2008;**148**(2):111-23.
5. Epstein RM, Fiscella K, Lesser CS, et al. Why the nation needs a policy push on patient-centered health care. *Health affairs* 2010;**29**(8):1489-95.
6. Bertakis KD, Azari R. Patient-centered care is associated with decreased health care utilization. *The Journal of the American Board of Family Medicine* 2011;**24**(3):229-39.
7. Delaney LJ. Patient-centred care as an approach to improving health care in Australia. *Collegian* 2017.
8. Fix GM, VanDeusen Lukas C, Bolton RE, et al. Patient - centred care is a way of doing things: How healthcare employees conceptualize patient - centred care. *Health Expectations* 2018;**21**(1):300-7.
9. Dwamena F, Holmes-Rovner M, Gauden CM, et al. Interventions for providers to promote a patient-centred approach in clinical consultations. *Cochrane Database Syst Rev* 2012;**12**(1).
10. Braithwaite J, Hibbert P, Blakely B, et al. Health system frameworks and performance indicators in eight countries: A comparative international analysis. *SAGE Open Medicine* 2017;**5**:2050312116686516.
11. Quality Indicator Measure Development, Implementation, Maintenance, and Retirement Rockville, MD: Agency for Healthcare Research and Quality: Center for Health Policy Center for Primary Care and Outcomes Research & Battelle Memorial Institute 2011.
12. Hughes RG. Tools and strategies for quality improvement and patient safety 2008.
13. Jolley RJ, Lorenzetti DL, Manalili K, et al. Protocol for a scoping review study to identify and classify patient-centred quality indicators. *BMJ open* 2017;**7**(1):e013632.
14. Arksey H, O'Malley L. Scoping studies: towards a methodological framework. *International journal of social research methodology* 2005;**8**(1):19-32.
15. Levac D, Colquhoun H, O'Brien KK. Scoping studies: advancing the methodology. *Implementation Science* 2010;**5**(1):69.
16. Agency for Healthcare Research and Quality. Quality Improvement and monitoring at your fingertips. Secondary Quality Improvement and monitoring at your fingertips. <https://www.qualityindicators.ahrq.gov/> (accessed 01 Oct 2017).

17. Synthesis. Secondary Synthesis 2016. <http://synthesis.info/> (accessed 01 Oct 2017).
18. Santana MJ, Manalili K, Jolley RJ, et al. How to practice person-centred care: A conceptual framework. *Health Expectations* 2017.
19. Donabedian A. The definition of quality and approaches to its assessment. Explorations in quality assessment and monitoring 1980.
20. Wensing M, Grol R, van Montfort P, et al. Indicators of the quality of general practice care of patients with chronic illness: a step towards the real involvement of patients in the assessment of the quality of care. *Quality and Safety in Health Care* 1996;**5**(2):73-80.
21. International Alliance of Patients' Organizations (IAPO). Patient-Centred Healthcare Indicators Review 2012.
22. NHS. Essence of Care Patient-focused benchmarks for clinical governance 2003.
23. Davies P, Wye L, Horrocks S, et al. Developing quality indicators for community services: the case of district nursing. *Quality in primary care* 2011;**19**(3):155.
24. Kelley E, Hurst J. Health care quality indicators project 2006.
25. Registered Nurses Association of Ontario. Client Centred Care. Toronto, Ontario 2002.
26. Lewis S. Patient-centered care: an introduction to what it is and how to achieve it. Saskatchewan Ministry of Health 2009.
27. OECD. Health Care Quality Indicators - Responsiveness and Patient Experiences. Secondary Health Care Quality Indicators - Responsiveness and Patient Experiences 2006. <http://www.oecd.org/els/health-systems/hcqi-responsiveness-and-patient-experiences.htm> (accessed 01 Oct 2017).
28. Carinci F, Van Gool K, Mainz J, et al. Towards actionable international comparisons of health system performance: expert revision of the OECD framework and quality indicators. *International Journal for Quality in Health Care* 2015;**27**(2):137-46.
29. den Breejen E, Nelen W, Schol S, et al. Development of guideline-based indicators for patient-centredness in fertility care: what patients add. *Human reproduction* 2013;**28**(4):987-96.
30. Dreesen M, Foulon V, Vanhaecht K, et al. Identifying patient-centered quality indicators for the care of adult home parenteral nutrition (HPN) patients. *Journal of Parenteral and Enteral Nutrition* 2014;**38**(7):840-46.
31. Ouwens M, Hermens R, Hulscher M, et al. Development of indicators for patient-centred cancer care. *Supportive Care in cancer* 2010;**18**(1):121.
32. Sewitch MJ, Dubé C, Brien S, et al. Patient-identified quality indicators for colonoscopy services. *Canadian Journal of Gastroenterology and Hepatology* 2013;**27**(1):25-32.
33. Uphoff EP, Wennekes L, Punt CJ, et al. Development of generic quality indicators for patient-centered cancer care by using a RAND modified Delphi method. *Cancer nursing* 2012;**35**(1):29-37.
34. Zimmerman S, Love K, Cohen LW, et al. Person-Centeredness in Home-and Community-Based Services and Supports: Domains, Attributes, and Assisted Living Indicators. *Clinical Gerontologist* 2014;**37**(5):429-45.
35. Cox J, Gray A. NHS at the hustings: four quality indicators for a person centred medicine. *European Journal for Person Centered Healthcare* 2015;**3**(1):1-3.

- 1  
2  
3  
4  
5  
6  
7  
8  
9  
10  
11  
12  
13  
14  
15  
16  
17  
18  
19  
20  
21  
22  
23  
24  
25  
26  
27  
28  
29  
30  
31  
32  
33  
34  
35  
36  
37  
38  
39  
40  
41  
42  
43  
44  
45  
46  
47  
48  
49  
50  
51  
52  
53  
54  
55  
56  
57  
58  
59  
60
36. Silow-Carroll S, Alteras T, Stepnick L. Patient-centered Care for Underserved Populations: Definition and Best Practices: Economic and Social Research Institute Washington, DC 2006.
  37. Lawrence M, Olesen F. Indicators of quality in health care. *The European Journal of General Practice* 1997;**3**(3):103-08.
  38. Campbell S, Braspenning J, Hutchinson A, et al. Research methods used in developing and applying quality indicators in primary care. *Qual Saf Health Care* 2002;**11**(4):358-64.
  39. Pencheon D. The good indicators guide: understanding how to use and choose indicators: NHS Institute for Innovation and Improvement 2008.
  40. Mainz J. Defining and classifying clinical indicators for quality improvement. *International Journal for Quality in Health Care* 2003;**15**(6):523-30.
  41. Epstein RM, Franks P, Fiscella K, et al. Measuring patient-centered communication in patient-physician consultations: theoretical and practical issues. *Social science & medicine* 2005;**61**(7):1516-28.
  42. Pitzul KB, Munce SE, Perrier L, et al. Scoping review of potential quality indicators for hip fracture patient care. *BMJ open* 2017;**7**(3):e014769.
  43. Hermann RC, Mattke S, Somekh D, et al. Quality indicators for international benchmarking of mental health care. *International Journal for Quality in Health Care* 2006;**18**(suppl\_1):31-38.
  44. Carr AJ, Gibson B, Robinson PG. Measuring quality of life: Is quality of life determined by expectations or experience? *BMJ: British Medical Journal* 2001;**322**(7296):1240.
  45. Santana MJ, Stelfox HT. Quality indicators used by trauma centers for performance measurement. *Journal of Trauma and Acute Care Surgery* 2012;**72**(5):1298-303.
  46. Agency for Healthcare Research and Quality. Pediatric Quality Indicators Overview. Secondary Pediatric Quality Indicators Overview. [https://www.qualityindicators.ahrq.gov/modules/pdi\\_resources.aspx](https://www.qualityindicators.ahrq.gov/modules/pdi_resources.aspx) (accessed 01 Oct 2017).
  47. The Lewin Group. Indicators of Cultural Competence in Health Care Delivery Organizations: An Organizational Cultural Competence Assessment Profile 2002.
  48. National Health Services UK. Friends and Family Test. <https://www.england.nhs.uk/fft/> (accessed 20 December 2017).
  49. National Quality Forum. Measure Evaluation Criteria. Secondary Measure Evaluation Criteria. [http://www.qualityforum.org/Measuring\\_Performance/Submitting\\_Standards/Measure\\_Evaluation\\_Criteria.aspx](http://www.qualityforum.org/Measuring_Performance/Submitting_Standards/Measure_Evaluation_Criteria.aspx) (accessed 01 Oct 2017).

1  
2  
3  
4  
5  
6  
7  
8  
9  
10  
11  
12  
13  
14  
15  
16  
17  
18  
19  
20  
21  
22  
23  
24  
25  
26  
27  
28  
29  
30  
31  
32  
33  
34  
35  
36  
37  
38  
39  
40  
41  
42  
43  
44  
45  
46  
47  
48  
49  
50  
51  
52  
53  
54  
55  
56  
57  
58  
59  
60

For peer review only

Figure 1- Flow Diagram for study inclusion

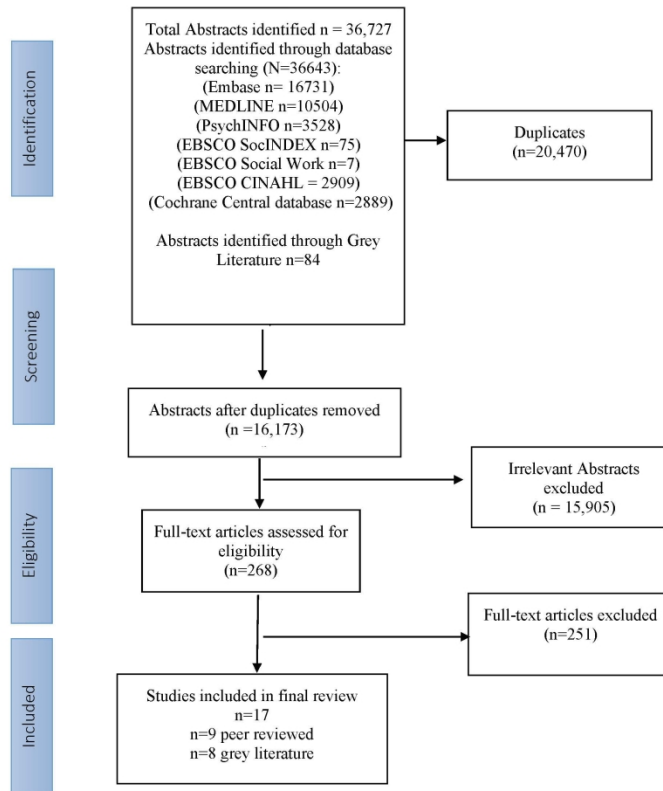

215x279mm (300 x 300 DPI)



## CINAHL (EBSCO)- Patient Centered Quality Indicators Search Strategies

1. (MH "Patient Centered Care") OR (MH "Gender Specific Care") OR (MH "Transcultural Care") OR (MH "Cultural Competence") OR (MH "Transcultural Nursing") OR (MH "Family Centered Care") OR (MH "Patient Satisfaction") OR (MH "Patient Rights+") OR (MH "Patient Advocacy")
2. TI ( ((carer\* or care giver\* or caregiver\* or culture\* or cultural\* or family or families or parents or patient\* or person) N5 (centered\* or centred\* or focused) N5 (care or healthcare or nursing or medical or medicine)) ) OR AB ( ((carer\* or care giver\* or caregiver\* or culture\* or cultural\* or family or families or parents or patient\* or person) N5 (centered\* or centred\* or focused) N5 (care or healthcare or nursing or medical or medicine)) )
3. TI ( ((carer\* or care giver\* or caregiver\* or cultural\* or culture\* or family or families or parents or patient\*) N5 (advocacy or autonomy or beliefs or choice or perspectives or preferences or rights or satisfaction or values or views) N5 (care or healthcare or nursing or medical or medicine)) ) OR AB ( ((carer\* or care giver\* or caregiver\* or cultural\* or culture\* or family or families or parents or patient\*) N5 (advocacy or autonomy or beliefs or choice or perspectives or preferences or rights or satisfaction or values or views) N5 (care or healthcare or nursing or medical or medicine)) )
4. TI ( (cultural competency or culturally competent care) ) OR AB ( (cultural competency or culturally competent care) )
5. 1 or 2 or 3 or 4
6. (MH "Clinical Indicators") OR (MH "Benchmarking") OR (MH "Clinical Governance") OR (MH "Guideline Adherence") OR (MH "Performance Measurement Systems") OR (MH "Quality Assessment") OR (MH "Quality Patient Care Scale") ) OR TI ( (performance measure\* or (healthcare N3 monitor\*) or performance reporting or QI or PQI or (quality N3 criteria) or (quality N3 indicator\*) or (quality N3 measure\*) or (quality N3 scale\*)) ) OR AB ( (performance measure\* or (healthcare N3 monitor\*) or performance reporting or QI or PQI or (quality N3 criteria) or (quality N3 indicator\*) or (quality N3 measure\*) or (quality N3 scale\*)) )
7. 5 and 6

## Patient Centered Quality Indicators Search Strategies

### MEDLINE

1. exp patient-centered care/
2. Culturally Competent Care/ or exp ethnic groups/
3. ((carer\* or care giver\* or caregiver\* or client\* or culture\* or cultural\* or ethnic\* or family or families or indigenous or parents or patient\* or person or racial\* or ethnocultural\* or immigrant\* or refugee\* or migrant\*) adj5 (centered\* or centred\* or focused) adj5 (care or healthcare or nursing or medical or medicine)).tw.kw.kf
4. cultural competency/ or patient satisfaction/ or patient preference/
5. exp Patient Rights/
6. ((carer\* or care giver\* or caregiver\* or client\* or cultural\* or culture\* or ethnic\* or family or families or indigenous or parents or patient\* or racial\* or ethnocultural\* or immigrant\* or refugee\* or migrant\*) adj5 (advocacy or autonomy or beliefs or choice or perspectives or preferences or rights or satisfaction or values or views) adj5 (care or healthcare or nursing or medical or medicine)).tw.
7. ((cultural\* or ethnic\* or racial\* or ethnocultural\* or immigrant\* or refugee\* or migrant\*) adj10 (competency or competent care)).tw.
8. 1 or 2 or 3 or 4 or 5 or 6 or 7 or 8
9. exp Quality Indicators, Health Care/
10. benchmarking/ or clinical audit/
11. (performance measure\* or (healthcare adj3 monitor\*) or performance reporting or QI or PQI or (quality adj3 criteria) or (quality adj3 indicator\*) or (quality adj3 measure\*) or (quality adj3 scale\*)).tw,kw.
12. Guideline Adherence/
13. 10 or 11 or 12 or 13
14. 9 and 14

1  
2  
3 15. limit 15 to yr="1990 -Current"  
4

5  
6 16. limit 16 to yr="2015 -Current"  
7  
8  
9  
10  
11  
12  
13  
14  
15  
16  
17  
18  
19  
20  
21  
22  
23  
24  
25  
26  
27  
28  
29  
30  
31  
32  
33  
34  
35  
36  
37  
38  
39  
40  
41  
42  
43  
44  
45  
46  
47  
48  
49  
50  
51  
52  
53  
54  
55  
56  
57  
58  
59  
60

For peer review only

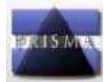

# PRISMA 2009 Checklist

| Section/topic                      | #  | Checklist item                                                                                                                                                                                                                                                                                              | Reported on page #  |
|------------------------------------|----|-------------------------------------------------------------------------------------------------------------------------------------------------------------------------------------------------------------------------------------------------------------------------------------------------------------|---------------------|
| <b>TITLE</b>                       |    |                                                                                                                                                                                                                                                                                                             |                     |
| Title                              | 1  | Identify the report as a systematic review, meta-analysis, or both.                                                                                                                                                                                                                                         | 1                   |
| <b>ABSTRACT</b>                    |    |                                                                                                                                                                                                                                                                                                             |                     |
| Structured summary                 | 2  | Provide a structured summary including, as applicable: background; objectives; data sources; study eligibility criteria, participants, and interventions; study appraisal and synthesis methods; results; limitations; conclusions and implications of key findings; systematic review registration number. | 2                   |
| <b>INTRODUCTION</b>                |    |                                                                                                                                                                                                                                                                                                             |                     |
| Rationale                          | 3  | Describe the rationale for the review in the context of what is already known.                                                                                                                                                                                                                              | 4                   |
| Objectives                         | 4  | Provide an explicit statement of questions being addressed with reference to participants, interventions, comparisons, outcomes, and study design (PICOS).                                                                                                                                                  | 4                   |
| <b>METHODS</b>                     |    |                                                                                                                                                                                                                                                                                                             |                     |
| Protocol and registration          | 5  | Indicate if a review protocol exists, if and where it can be accessed (e.g., Web address), and, if available, provide registration information including registration number.                                                                                                                               | 4                   |
| Eligibility criteria               | 6  | Specify study characteristics (e.g., PICOS, length of follow-up) and report characteristics (e.g., years considered, language, publication status) used as criteria for eligibility, giving rationale.                                                                                                      | 5                   |
| Information sources                | 7  | Describe all information sources (e.g., databases with dates of coverage, contact with study authors to identify additional studies) in the search and date last searched.                                                                                                                                  | 5                   |
| Search                             | 8  | Present full electronic search strategy for at least one database, including any limits used, such that it could be repeated.                                                                                                                                                                               | Supplemental file 1 |
| Study selection                    | 9  | State the process for selecting studies (i.e., screening, eligibility, included in systematic review, and, if applicable, included in the meta-analysis).                                                                                                                                                   | 5                   |
| Data collection process            | 10 | Describe method of data extraction from reports (e.g., piloted forms, independently, in duplicate) and any processes for obtaining and confirming data from investigators.                                                                                                                                  | 5                   |
| Data items                         | 11 | List and define all variables for which data were sought (e.g., PICOS, funding sources) and any assumptions and simplifications made.                                                                                                                                                                       | 5                   |
| Risk of bias in individual studies | 12 | Describe methods used for assessing risk of bias of individual studies (including specification of whether this was done at the study or outcome level), and how this information is to be used in any data synthesis.                                                                                      | N/A                 |
| Summary measures                   | 13 | State the principal summary measures (e.g., risk ratio, difference in means).                                                                                                                                                                                                                               | N/A                 |
| Synthesis of results               | 14 | Describe the methods of handling data and combining results of studies, if done, including measures of consistency (e.g., $I^2$ ) for each meta-analysis.                                                                                                                                                   | 6                   |



# PRISMA 2009 Checklist

Page 1 of 2

| Section/topic                 | #  | Checklist item                                                                                                                                                                                           | Reported on page # |
|-------------------------------|----|----------------------------------------------------------------------------------------------------------------------------------------------------------------------------------------------------------|--------------------|
| Risk of bias across studies   | 15 | Specify any assessment of risk of bias that may affect the cumulative evidence (e.g., publication bias, selective reporting within studies).                                                             | N/A                |
| Additional analyses           | 16 | Describe methods of additional analyses (e.g., sensitivity or subgroup analyses, meta-regression), if done, indicating which were pre-specified.                                                         | N/A                |
| <b>RESULTS</b>                |    |                                                                                                                                                                                                          |                    |
| Study selection               | 17 | Give numbers of studies screened, assessed for eligibility, and included in the review, with reasons for exclusions at each stage, ideally with a flow diagram.                                          | 6                  |
| Study characteristics         | 18 | For each study, present characteristics for which data were extracted (e.g., study size, PICOS, follow-up period) and provide the citations.                                                             | 7                  |
| Risk of bias within studies   | 19 | Present data on risk of bias of each study and, if available, any outcome level assessment (see item 12).                                                                                                | N/A                |
| Results of individual studies | 20 | For all outcomes considered (benefits or harms), present, for each study: (a) simple summary data for each intervention group (b) effect estimates and confidence intervals, ideally with a forest plot. | 7-11               |
| Synthesis of results          | 21 | Present results of each meta-analysis done, including confidence intervals and measures of consistency.                                                                                                  | N/A                |
| Risk of bias across studies   | 22 | Present results of any assessment of risk of bias across studies (see Item 15).                                                                                                                          | N/A                |
| Additional analysis           | 23 | Give results of additional analyses, if done (e.g., sensitivity or subgroup analyses, meta-regression [see Item 16]).                                                                                    | N/A                |
| <b>DISCUSSION</b>             |    |                                                                                                                                                                                                          |                    |
| Summary of evidence           | 24 | Summarize the main findings including the strength of evidence for each main outcome; consider their relevance to key groups (e.g., healthcare providers, users, and policy makers).                     | 13                 |
| Limitations                   | 25 | Discuss limitations at study and outcome level (e.g., risk of bias), and at review-level (e.g., incomplete retrieval of identified research, reporting bias).                                            | 14                 |
| Conclusions                   | 26 | Provide a general interpretation of the results in the context of other evidence, and implications for future research.                                                                                  | 14                 |
| <b>FUNDING</b>                |    |                                                                                                                                                                                                          |                    |
| Funding                       | 27 | Describe sources of funding for the systematic review and other support (e.g., supply of data); role of funders for the systematic review.                                                               | 15                 |

From: Moher D, Liberati A, Tetzlaff J, Altman DG, The PRISMA Group (2009). Preferred Reporting Items for Systematic Reviews and Meta-Analyses: The PRISMA Statement. PLoS Med 6(6): e1000097. doi:10.1371/journal.pmed1000097

For more information, visit: [www.prisma-statement.org](http://www.prisma-statement.org).

Page 2 of 2

For peer review only - <http://bmjopen.bmj.com/site/about/guidelines.xhtml>

# BMJ Open

## Measuring patient-centred system performance: A scoping review of patient-centred care quality indicators

|                                 |                                                                                                                                                                                                                                                                                                                                                                                                                                                                                                                                                                                                                     |
|---------------------------------|---------------------------------------------------------------------------------------------------------------------------------------------------------------------------------------------------------------------------------------------------------------------------------------------------------------------------------------------------------------------------------------------------------------------------------------------------------------------------------------------------------------------------------------------------------------------------------------------------------------------|
| Journal:                        | <i>BMJ Open</i>                                                                                                                                                                                                                                                                                                                                                                                                                                                                                                                                                                                                     |
| Manuscript ID                   | bmjopen-2018-023596.R2                                                                                                                                                                                                                                                                                                                                                                                                                                                                                                                                                                                              |
| Article Type:                   | Research                                                                                                                                                                                                                                                                                                                                                                                                                                                                                                                                                                                                            |
| Date Submitted by the Author:   | 15-Nov-2018                                                                                                                                                                                                                                                                                                                                                                                                                                                                                                                                                                                                         |
| Complete List of Authors:       | Santana, Maria-Jose; University of Calgary, Community Health Sciences; University of Calgary Cumming School of Medicine, Pediatrics<br>Ahmed, Sadia; University of Calgary Cumming School of Medicine, Pediatrics<br>Lorenzetti, Diane; University of Calgary, Community Health Sciences<br>Jolley, Rachel; University of Calgary, Community Health Sciences<br>Manalili, Kimberly; University of Calgary, Community Health Sciences<br>Zelinsky, Sandra; University of Calgary, PaCER Innovates<br>Quan, Hude; University of Calgary, Community Health Sciences<br>Lu, Mingshan ; University of Calgary, Economics |
| <b>Primary Subject Heading</b>: | Patient-centred medicine                                                                                                                                                                                                                                                                                                                                                                                                                                                                                                                                                                                            |
| Secondary Subject Heading:      | Health services research                                                                                                                                                                                                                                                                                                                                                                                                                                                                                                                                                                                            |
| Keywords:                       | Patient-centred care, Quality indicators, healthcare quality, quality improvement                                                                                                                                                                                                                                                                                                                                                                                                                                                                                                                                   |
|                                 |                                                                                                                                                                                                                                                                                                                                                                                                                                                                                                                                                                                                                     |

SCHOLARONE™  
Manuscripts

## Measuring patient-centred system performance: A scoping review of patient-centred care quality indicators

Maria J Santana,<sup>1,2\*</sup> Sadia Ahmed,<sup>2</sup> Diane L Lorenzetti,<sup>1,3</sup> Rachel J Jolley,<sup>1</sup> Kimberly Manalili,<sup>1</sup> Sandra Zelinsky,<sup>1</sup> Hude Quan,<sup>1</sup> Mingshan Lu<sup>1,4</sup>

<sup>1</sup> Department of Community Health Sciences, University of Calgary, Calgary, Alberta, Canada

Maria J Santana, Assistant Professor

Diane L Lorenzetti, Research Librarian

Rachel J Jolley, Research Associate

Kimberly Manalili, Research Associate

Sandra Zelinsky, Patient Research Partner

Hude Quan, Professor

Mingshan Lu, Professor

<sup>2</sup> Department of Pediatrics, Cumming School of Medicine, University of Calgary, Canada

Maria J Santana, Assistant Professor

Sadia Ahmed, Research Assistant

<sup>3</sup> Health Sciences Library, University of Calgary, Calgary, Alberta, Canada

Diane L Lorenzetti, Research Librarian

<sup>4</sup> Department of Economics, University of Calgary, Calgary, Alberta, Canada

Mingshan Lu, Professor

### \*Corresponding author:

**Maria J. Santana, PhD**

Email: [mjsantan@ucalgary.ca](mailto:mjsantan@ucalgary.ca)

Department of Pediatrics

Department of Community Health Sciences

Cumming School of Medicine, University of Calgary

TRW Building, 3rd Floor

3280 Hospital Drive NW

Calgary, Alberta CANADA T2N 4Z6

Phone: (403) 955-2783

Word Count: 2,844

Number of references: 49

Number of Figures: 1

Number of Tables: 4



## Abstract

**Objectives:** The shift to the patient-centred care model as a healthcare delivery paradigm calls for systematic measurement and evaluation. In an attempt to develop patient-centred quality indicators (PC-QIs), this study aimed to identify quality indicators that can be used to measure patient-centred care.

### Methods:

Design: Scoping review

Data Sources: Studies were identified through searching 7 electronic databases and the grey literature. Search terms included: quality improvement, quality indicators, healthcare quality, patient-centred care.

Eligibility Criteria: Articles were included if they mentioned development and/or implementation of PC-QIs.

Data Extraction & Synthesis: Extracted data included study characteristics (country, year of publication, type of study/article), patients' inclusion in the development of indicators, and type of patient populations and point of care if applicable (e.g. in-patient, out-patient, primary care)

**Results:** A total 184 full-text peer-reviewed articles were assessed for eligibility for inclusion; of these, nine articles were included in this review. From the non-peer-reviewed literature, eight documents met the criteria for inclusion in this study. This review revealed the heterogeneity describing and defining the nature of PC-QIs. Most PC-QIs were presented as patient-centred care (PCC) measures and identified as guidelines, surveys, or recommendations, and therefore cannot be classified as actual PC-QIs. Out of 502 ways to measure PCC, only 25 were considered to be actual PC-QIs. None of the identified articles implemented the quality indicators in care settings.

**Conclusion:** The identification of PC-QIs is a key first step in laying the groundwork to develop evidence-based PC-QIs. Research is needed to continue the development and implementation of PC-QIs for healthcare quality improvement.

**Keywords:** patient-centred care, quality indicator, healthcare quality, quality improvement

1  
2  
3  
4  
5  
6  
7  
8  
9  
10  
11  
12  
13  
14  
15  
16  
17  
18  
19  
20  
21  
22  
23  
24  
25  
26  
27  
28  
29  
30  
31  
32  
33  
34  
35  
36  
37  
38  
39  
40  
41  
42  
43  
44  
45  
46  
47  
48  
49  
50  
51  
52  
53  
54  
55  
56  
57  
58  
59  
60

Strengths

- Transparent and rigorous search strategy
- Involvement of patient partner in the study
- Study informed by a previously published protocol<sup>9</sup>

Limitations

- Search strategy using only English terms
- We did not assess the quality of the measures and/or indicators identified

For peer review only

## INTRODUCTION

Patient-centred care (PCC) is one of the six dimensions of healthcare and was formally described by the Institute of Medicine in 2001 as “*healthcare that respects and responds to the preferences, needs and values of the individual patients throughout all healthcare decisions*”.<sup>1</sup> PCC is an approach that has become central to policies and programming to improve healthcare efficiencies and address patient safety issues.<sup>2</sup>

PCC is a model in which healthcare providers are encouraged to partner with patients and families to design and deliver individualized care. PCC models have been linked to positive patient experiences and improved outcomes, such as increased adherence to care and treatment.<sup>3-5</sup> In the literature, a PCC approach has been found to not only benefits patients, but also healthcare organizations in reducing costs, for instance through decreasing the length of hospital stays and readmission rates.<sup>6,7</sup> However, patient-centred care is conceptualized differently among different stakeholders, impacting effective implementation in care settings.<sup>8</sup> The adoption of a PCC model requires first, the identification of appropriate indicators to measure the quality of PCC, and second, the assessment of the impact of delivering PCC on healthcare system and patient outcomes.<sup>9</sup>

Quality indicators are tools that measure system performance and healthcare quality, and demonstrate the extent to which improvement efforts have led to desirable change, or contributed to unintended results.<sup>10</sup> As identified from the Agency for Healthcare Research and Quality (AHRQ), a quality indicator consists of: a specific aspect of quality being captured, and a method for how concepts of quality are captured (which includes: data source, measure type, observable event, specification and risk adjustment).<sup>11</sup> While various quality indicators have been developed to measure healthcare safety, effectiveness and access,<sup>12</sup> they typically do not incorporate the priorities and experiences of patients and family caregivers. To truly evaluate the impact of patient-centredness, indicators must reflect the patient and family caregiver perspective.

This scoping review aimed to synthesize existing literature on quality indicators used in the evaluation of patient-centred care. This review was guided by the questions: “What PC-QIs have been developed to measure patient-centred care?” “How are patient-centred quality indicators defined?” and “Have existing PC-QIs been implemented and evaluated across various points-of-care settings, processes of care, and at the systems level to measure patient-centred care?” The information gained from this study will inform the development of patient-centred care quality indicators that could be implemented to drive healthcare improvement valued by patients and families.

## METHODS

We employed a scoping review protocol that was previously published,<sup>13</sup> using methodology based on Arksey and O’Malley’s scoping review framework<sup>14</sup> and Levac *et al.*’s methodological enhancement.<sup>15</sup> We searched the peer-reviewed published and grey literature for either proposed or existing quality indicators that have been developed and/or implemented across various points-of-care settings to measure patient-centred

1  
2  
3 care. For this scoping review, the Agency for Healthcare Research & Quality (AHRQ)<sup>16</sup>  
4 definition of a quality indicator was adapted to incorporate a patient and family focus.  
5 Specifically, a patient-centred quality indicator (PC-QI) was defined as the unit of  
6 measurement of healthcare system, organizational or individual performance, that  
7 quantify patients' and families' experiences with the care received and quantify the  
8 experience of any individual who needs to contact with healthcare services." In contrast,  
9 PCC measures are in the form of a survey, guideline, or recommendation.  
10  
11  
12

### 13 **Data sources and search strategy**

14  
15 In order to identify studies assessing quality indicators for patient-centred care, search  
16 strategies were developed that combined terms from two concepts: patient-centred care  
17 and quality indicators (supplemental file 1). The Cochrane Library, the Cumulative Index  
18 to Nursing and Allied Health Literature (CINAHL), EMBASE, MEDLINE, PsycINFO,  
19 Social Services Abstracts, and Social Work Abstracts were searched from inception to  
20 May 2017. A search of the Google search engines, and the websites of relevant quality  
21 improvement and patient-centric organizations enabled the identification of relevant grey  
22 literature. Grey literature searches were conducted in duplicate by both a researcher and  
23 patient partner. The reference lists of included studies were also scanned to identify any  
24 other studies of relevance.  
25  
26  
27  
28

### 29 **Citation management**

30  
31 All references were imported into a custom-written Java software application, Synthesis  
32 for reference management and data collection.<sup>17</sup> Duplicate citations were removed  
33 automatically by the software, with any mismatched duplicates removed manually if  
34 detected.  
35  
36  
37

### 38 **Study selection and data abstraction**

39  
40 To be eligible for inclusion, the study/article had to 1) identify quality indicators for PCC  
41 and/or 2) identify PC-QI in performance measurement (e.g., validation). The title and  
42 abstract of each citation identified was screened for eligibility independently by two  
43 reviewers (MJS, ML). The full-text of any abstract selected by either reviewer was  
44 retrieved and assessed for eligibility. Any full-text articles for which there was inter-rater  
45 discord were reviewed a second time, and final disagreements about study eligibility  
46 were resolved through discussion.  
47  
48

### 49 **Data collection and Classification of Indicators**

50  
51 A data collection tool was developed and tested on a sample of papers to determine its  
52 practicality prior to the full review (supplemental file 2). Extracted data included study  
53 characteristics (country, year of publication, type of study/article), patients' inclusion in  
54 the development of indicators, and type of patient populations and point of care if  
55 applicable (e.g. in-patient, out-patient, primary care).  
56  
57  
58  
59  
60

1  
2  
3  
4 All extracted indicators were classified collaboratively by two authors (MS, SA)  
5 according to a person-centred care framework<sup>18</sup> developed by the team and guided by the  
6 Donabedian model of quality of care.<sup>19</sup> This framework provides a roadmap for  
7 healthcare systems to implement and measure PCC at the level of structure (the health  
8 care system/organizational level); process (the patient-healthcare provider interaction  
9 level), and outcome (the patient-health care provider, healthcare systems interaction  
10 level).<sup>18</sup>  
11  
12

### 13 **Patient Involvement**

14 Levac et al, recommends the involvement of stakeholders in the scoping review  
15 methodology.<sup>15</sup> We worked closely with our patient-research partner (SZ) in the design  
16 of the study who also aided in the search strategy. Our patient research partner aided in  
17 the clarification of research questions as well. The involvement of patient research  
18 partners allows for suggestions of additional references as well as the provision of  
19 insights beyond those in the literature.<sup>15</sup>  
20  
21

## 22 **RESULTS**

23  
24  
25 A total of 36,643 citations were retrieved, and upon duplicate removal, a total of 16,173  
26 citations were reviewed at the title and abstract stage for inclusion (Figure 1). A total 184  
27 full-text peer-reviewed articles were assessed for eligibility for inclusion; of these, nine  
28 articles were included in this review (Figure 1). From the non- peer-reviewed literature,  
29 following the title and document review, eight documents met the criteria for inclusion in  
30 this study (Figure 1). The most common reason for excluding articles (n=15,905) was the  
31 absence of indicators for PCC.  
32  
33

### 34 **Article Description**

35  
36  
37 Table 1 presents the characteristics of the full text articles included in the study. The  
38 years of publication ranged from 1996 to 2015. Included studies were published in  
39 Belgium (n=1), United States of America (n=2), Canada (n=3), United Kingdom (n=4),  
40 the Netherlands (n=4), and three sources did not include a country of publication. Sources  
41 were varied and included original peer reviewed research (n=8), guest editorial (n=1),  
42 reports (n=4), discussion paper (n=1), working paper (n=1), literature review (n=1), and a  
43 website (n=1). The study populations varied in the peer reviewed literature (e.g., cancer,  
44 fertility care, HPN, etc.) and no specific populations were identified in the non-peer  
45 reviewed literature.  
46  
47  
48  
49

50 “What PC-QIs have been developed to measure patient centred care?”  
51

52  
53 From the sources included, a total of 502 ways of measuring PCC were explicitly  
54 identified as quality indicators by studies’ authors. However only 25 were classified as  
55 actual indicators by our research team.  
56  
57  
58  
59

PCC measurement varied between articles. While all sources used the term ‘quality indicator’, not all were quantifiable and measurable. Most sources presented quality indicators as guidelines or recommendations for healthcare practitioners. Wensing *et al.* presented indicators as survey items, such as “Does the GP pay attention to patients’ needs?”<sup>20</sup> Actual indicators were presented as percentages and proportions, and identified from six grey literature sources.<sup>21-26</sup> For instance, one study outlined an example of a structure indicator - “Percent of nurses attending education sessions (orientation, organization professional development opportunities) on client centred care.”<sup>25</sup>

Study populations included cancer patients (n=2), colonoscopy patients (n=1), home parenteral nutrition patients (HPN) (n=1), chronically ill (n=1), fertility care (n=1), and assisted living support patients (n=1) (Table 1). For the development of PCC measures, seven studies used focus groups, interviews, and/or consensus meetings, ten studies included patients and family caregivers in the development of PCC measures, and one article developed measures through the authors’ clinical and research work. Two sources developed ways to measure PCC from patient reported experience surveys,<sup>24 27</sup> and two studies used a framework.<sup>25 28</sup>

Some studies grouped ways to measure PCC according to domains of patient-centred care that were based on previously defined frameworks or through consensus (e.g., access to care, communication and information). Domains identified from the person-centred care framework are categorized according to structure, process, and outcome.<sup>18</sup> Table 2 presents examples of measuring PCC classified according to the person-centred care framework,<sup>18</sup> and Table 3 presents the actual indicators classified according to the same framework.<sup>18</sup>

**Table 1. Characteristics of Articles on Patient-Centred Quality Indicators**

| Study identifier (first author)         | Country     | Year | Study Type                                           | Population                               | Patients involved | Number of Indicators & ways to measure PCC |
|-----------------------------------------|-------------|------|------------------------------------------------------|------------------------------------------|-------------------|--------------------------------------------|
| <b>Peer reviewed literature (n=9)</b>   |             |      |                                                      |                                          |                   |                                            |
| den Breejen <i>et al.</i> <sup>29</sup> | Netherlands | 2013 | Focus groups/interviews/ consensus meetings          | Fertility care                           | Yes               | 34                                         |
| Dreesen <i>et al.</i> <sup>30</sup>     | Belgium     | 2014 | Focus groups/interviews/ consensus meetings;         | Home parenteral nutrition (HPN) patients | Yes               | 33                                         |
| Ouwens <i>et al.</i> <sup>31</sup>      | Netherlands | 2010 | Focus groups/interviews/ consensus meetings;         | Cancer- Non-small cell lung carcinoma    | Yes               | 54                                         |
| Sewitch <i>et al.</i> <sup>32</sup>     | Canada      | 2013 | Focus groups/interviews/ consensus meetings; Surveys | Colonoscopy patients - adult             | Yes               | 20                                         |

|                                                                                         |                |      |                                                     |                                                                                                                                                   |     |     |
|-----------------------------------------------------------------------------------------|----------------|------|-----------------------------------------------------|---------------------------------------------------------------------------------------------------------------------------------------------------|-----|-----|
| Uphoff et al. <sup>33</sup>                                                             | Netherlands    | 2012 | Focus groups/interviews/consensus meetings          | Cancer                                                                                                                                            | Yes | 21  |
| Wensing et al. <sup>20</sup>                                                            | Netherlands    | 1996 | Focus groups/interviews/consensus meetings; Surveys | Chronically ill patients (chronic obstructive pulmonary disease, diabetes, cardiovascular disease, migraine, chronic disease of locomotor system) | Yes | 41  |
| Zimmerman et al. <sup>34</sup>                                                          | USA            | 2014 | Focus groups/interviews/consensus meetings          | Community-based, assisted living support patients                                                                                                 | Yes | 43  |
| Cox et al. <sup>35</sup>                                                                | United Kingdom | 2014 | Guest editorial                                     | -                                                                                                                                                 | -   | 4   |
| Carinci et al. <sup>28</sup>                                                            | United Kingdom | 2015 | Modified Delphi approach/consensus meeting          | -                                                                                                                                                 | -   | 12  |
| <b>non-peer reviewed Literature (n=8)</b>                                               |                |      |                                                     |                                                                                                                                                   |     |     |
| Steven Lewis <sup>26</sup>                                                              | Canada         | 2009 | Discussion paper                                    | -                                                                                                                                                 | -   | 6   |
| RNAO <sup>25</sup>                                                                      | Canada         | 2002 | Guidelines document/report                          | -                                                                                                                                                 | -   | 18  |
| Silow-Carroll et al. <sup>36</sup>                                                      | USA            | 2006 | Report                                              | -                                                                                                                                                 | -   | 6   |
| Kelley & Hurst (OECD) <sup>24</sup>                                                     | -              | 2006 | Working papers                                      | -                                                                                                                                                 | Yes | 7   |
| OECD <sup>27</sup>                                                                      | -              | 2006 | OECD website                                        | -                                                                                                                                                 | Yes | 8   |
| Essence of Care- Patient Focused benchmarks for clinical governance (NHS) <sup>22</sup> | United Kingdom | 2003 | Report                                              | -                                                                                                                                                 | Yes | 116 |
| Davies et al. <sup>23</sup>                                                             | United Kingdom | 2009 | Report                                              | -                                                                                                                                                 | -   | 10  |
| IAPO <sup>21</sup>                                                                      | -              | 2012 | Literature review                                   | -                                                                                                                                                 | -   | 69  |

PCC, Patient-Centred Care

OECD, Organization for Economic Co-operation and Development

NHS, National Health Services

RNAO, Registered Nurses Association Ontario

IAPO, International Alliance of Patients' Organizations



**Table 2. Examples of PCC measurement classified according to the person-centred care framework.<sup>18</sup>**

| PCC Measure Classification | Domain                                                         | Example of ways to measure PCC                                                                                                                                                                                                                                                                                                                                                                   |
|----------------------------|----------------------------------------------------------------|--------------------------------------------------------------------------------------------------------------------------------------------------------------------------------------------------------------------------------------------------------------------------------------------------------------------------------------------------------------------------------------------------|
| Structure (n=80)           | Supporting a workforce committed to Patient-Centred Care (PCC) | <ul style="list-style-type: none"> <li>The development needs of health care personnel are met by ongoing review through supervision, appraisal and individual development plans<sup>22</sup></li> <li>All staff and volunteers can articulate person-centred principles and practices applicable to their role(s) and demonstrate their implementation<sup>34</sup></li> </ul>                   |
|                            | Providing a supportive and accommodating PCC environment       | <ul style="list-style-type: none"> <li>Residents have a choice of a private room<sup>34</sup></li> <li>Patient satisfaction survey translated into Spanish<sup>35</sup></li> </ul>                                                                                                                                                                                                               |
| Process (n=343)            | Cultivating Communication                                      | <ul style="list-style-type: none"> <li>(Regular) doctor involving patients in decisions about care or treatment<sup>27</sup></li> <li>Making use of open-ended questions in a conversation with the patient<sup>33</sup></li> <li>Patient had the knowledge and support to make decisions<sup>31</sup></li> <li>Regular doctor providing easy-to-understand explanations<sup>28</sup></li> </ul> |
|                            | Respectful and compassionate care                              | <ul style="list-style-type: none"> <li>Patient received emotional support from nurses if needed<sup>31</sup></li> <li>Giving confidence to the patient<sup>30</sup></li> <li>Does the GP pay attention to patients' needs?<sup>20</sup></li> </ul>                                                                                                                                               |
| Outcome (n=79)             | Patient-Reported Outcomes (PROs)                               | <ul style="list-style-type: none"> <li>Measures are in place to assess and provide feedback on the interpersonal skills of health care personnel<sup>22</sup></li> <li>Regarding infertility treatment, patients would like to see all members of the infertility treatment team following the same policy<sup>29</sup></li> </ul>                                                               |

**Table 3. Identified Patient Centred Quality Indicators from the literature classified according to the person-centered care framework as actual indicators<sup>18</sup>**

| Type of Indicator | Domain                 | PCC Indicators (n=25)                                                                                                                                                                                                                                                                                                         |
|-------------------|------------------------|-------------------------------------------------------------------------------------------------------------------------------------------------------------------------------------------------------------------------------------------------------------------------------------------------------------------------------|
| Structure         | Creating a PCC Culture | <ul style="list-style-type: none"> <li>An induction programme is in place which promotes the philosophy of care<sup>22</sup></li> <li>% of PHC organizations who currently have processes to involve community input for planning the organization's services (e.g. advisory committees, focus groups<sup>21</sup></li> </ul> |

|         |                                          |                                                                                                                                                                                                                                                                                                                                                                                                                                                                                                                                                                                                                                                                                                                                                                                                                         |
|---------|------------------------------------------|-------------------------------------------------------------------------------------------------------------------------------------------------------------------------------------------------------------------------------------------------------------------------------------------------------------------------------------------------------------------------------------------------------------------------------------------------------------------------------------------------------------------------------------------------------------------------------------------------------------------------------------------------------------------------------------------------------------------------------------------------------------------------------------------------------------------------|
|         |                                          | <ul style="list-style-type: none"> <li>• Clear policies are in place on how services are offered to patients<sup>21</sup></li> </ul>                                                                                                                                                                                                                                                                                                                                                                                                                                                                                                                                                                                                                                                                                    |
|         | Supporting a workforce committed to PCC  | <ul style="list-style-type: none"> <li>• Percent of nurses attending education sessions (orientation, organization professional development opportunities) on client centred care<sup>25</sup></li> <li>• Percent of non-nursing staff attending education sessions (orientation, organization professional development opportunities) on client centred care<sup>25</sup></li> </ul>                                                                                                                                                                                                                                                                                                                                                                                                                                   |
| Process | Cultivating Communication                | <ul style="list-style-type: none"> <li>• % of patients with access to an on-line HER a) By region b) By practice<sup>26</sup></li> <li>• Proportion of service users who stated that the district nurse provided health advice or information about his/her condition<sup>23</sup></li> <li>• Proportion of service users who stated that they were involved as much as they wanted to be in decisions about their care and treatment<sup>23</sup></li> </ul>                                                                                                                                                                                                                                                                                                                                                           |
|         | Respectful and compassionate care        | <ul style="list-style-type: none"> <li>• Proportion of service users who stated that their district nurse treated them with respect and dignity<sup>23</sup></li> <li>• % of inpatients who said they were always treated with respect and dignity while in hospital/primary care<sup>21</sup></li> </ul>                                                                                                                                                                                                                                                                                                                                                                                                                                                                                                               |
|         | Engaging patients in managing their care | <ul style="list-style-type: none"> <li>• % of PHC clients/patients, 18 years and over, with a chronic condition(s), who actively participated in the development of a treatment plan with their PHC provider over the past 12 months<sup>21</sup></li> <li>• % of hospital patients who said they had been sufficiently involved in decisions about their care as much as they wanted to be<sup>21</sup></li> <li>• Percent of nurses self-reporting: Adequate assessment of a client's perceived needs for care, adequate assessment of a client's goals for care, adequate documentation of a client's personal goals for care, sharing client's concerns/choices with other members of the health care team, discharge teaching guided by the client's goals for managing their care at home<sup>25</sup></li> </ul> |
|         | Integration of Care                      | <ul style="list-style-type: none"> <li>• % of hospital patients taking medicines home after discharge who were told completely about the purposes of the medicine in a way they could understand<sup>21</sup></li> </ul>                                                                                                                                                                                                                                                                                                                                                                                                                                                                                                                                                                                                |

|         |                                      |                                                                                                                                                                                                                                                                                                                                                                                                                                                                                                                                                                                                                                                                                                                                                                                                                                                                                                                                                                                                                                                                              |
|---------|--------------------------------------|------------------------------------------------------------------------------------------------------------------------------------------------------------------------------------------------------------------------------------------------------------------------------------------------------------------------------------------------------------------------------------------------------------------------------------------------------------------------------------------------------------------------------------------------------------------------------------------------------------------------------------------------------------------------------------------------------------------------------------------------------------------------------------------------------------------------------------------------------------------------------------------------------------------------------------------------------------------------------------------------------------------------------------------------------------------------------|
|         | Access to Care                       | <ul style="list-style-type: none"> <li>• % of patients who can get all diagnostic work ordered by their primary care doctor done the same day in the same location (excluding certain high-technology procedures such as CT and MRI)<sup>26</sup></li> <li>• Percentage of outpatients seen within 13 weeks of GP referral<sup>24</sup></li> <li>• Percentage of those on waiting list waiting 12 months or more<sup>24</sup></li> <li>• Proportion of service users who were able to contact a district nurse when needed, including outside of normal working hours<sup>23</sup></li> <li>• The percentage of patients who, in the appropriate national survey, indicate that they were able to obtain a consultation with a GP or appropriate health care professional within 2 working days (NHS Confederation, UK)<sup>21</sup></li> <li>• % of PHC clients/patients, 18 years and over, with a chronic condition(s), who had sufficient time in most visits to confide their health-related feelings, fears and concerns to their PHC provider<sup>21</sup></li> </ul> |
| Outcome | Patient-Reported Experiences (PREMs) | <ul style="list-style-type: none"> <li>• Proportion of service users who stated that the district nurse had all the necessary information about the service user and his/ her health needs<sup>23</sup></li> <li>• Proportion of service users who stated that the district nurse had all the equipment and dressings needed<sup>23</sup></li> <li>• Proportion of service users who stated that the district nurse was knowledgeable and competent<sup>23</sup></li> <li>• Proportion of service users who rated the district nurse service as very good or excellent<sup>23</sup></li> <li>• Proportion of children whose parents routinely received all aspects of family centred care (Child and Adolescent Health Measurement Initiative)<sup>21</sup></li> </ul>                                                                                                                                                                                                                                                                                                       |

PHC, Primary Healthcare  
 HER, Health Electronic Record  
 CT, Computed Tomography  
 MRI, Magnetic Resonance Imaging  
 GP, General Practitioner  
 NHS, National Health Services  
 UK, United Kingdom

### How are patient-centred quality indicators defined?

The definition of a PC-QI was not clearly articulated in the studies identified (Table 4). Ten of the included studies provided no such definition of a quality indicator (Table 4). Sources where the definition of a quality indicator was mentioned defined indicators as something to be measured, and developed through consensus (Table 4).<sup>23 30 31 33</sup> Of those four sources where the definition of a PC-QI was clear, two included actual indicators.<sup>21</sup>  
<sup>23</sup> The National Health Services (2003) report described indicators as ‘items that patients, carers and professionals believed were important in achieving the benchmarks of best practice.’<sup>22</sup>

### Have the existing patient-centred quality indicators been implemented and evaluated across various points-of-care settings, processes of care and at the system level to measure patient-centred care?

None of the articles mentioned actual implementation of indicators in the settings for which they were developed. Similarly, many of the sources (15/17) did not evaluate the indicators according to any set criteria. The two studies that did evaluate indicators, used two different approaches.<sup>28 31</sup> The study by Ouwens *et al.* assessed guidelines for psychometric characteristics and only 26 out of 56 guidelines were found to be reliable.<sup>31</sup> The study by Carinci *et al.* used a modified Delphi approach with expert Organization for Economic Co-operation and Development (OECD) members to rate the PCC measures, using validity, reliability, relevance, actionability, international feasibility, and international comparability as the criteria.<sup>28</sup> Uphoff *et al.*, recommended using the Gol & Grimshaw model for evaluating indicators,<sup>33</sup> while a future direction for Zimmerman *et al.* was the evaluation of the indicators.<sup>34</sup> The working paper by Kelley and Hurst presented criteria that can be used to select indicators.<sup>24</sup> These included the importance of what is being measured (which includes policy importance), scientific soundness, and feasibility of the measure.<sup>24</sup>

Table 4. Definition of quality indicator used by authors

| Study Identifier (First Author, year)                                                                                                                                                                                                                                                                                                                                                                                                                                      | Definition of quality indicator used                                                                                                                                                                              |
|----------------------------------------------------------------------------------------------------------------------------------------------------------------------------------------------------------------------------------------------------------------------------------------------------------------------------------------------------------------------------------------------------------------------------------------------------------------------------|-------------------------------------------------------------------------------------------------------------------------------------------------------------------------------------------------------------------|
| (den Breejen <i>et al.</i> , 2013), <sup>29</sup> (Sewitch <i>et al.</i> , 2013), <sup>32</sup> (Uphoff <i>et al.</i> , 2012), <sup>33</sup> (Zimmerman <i>et al.</i> , 2014), <sup>34</sup> (Cox <i>et al.</i> , 2014), <sup>35</sup> (Lewis, 2009), <sup>26</sup> (RNAO, 2002), <sup>25</sup> (Silow-Carroll <i>et al.</i> , 2006), <sup>36</sup> (Kelley & Hurst, 2006), <sup>24</sup> (OECD website, 2006), <sup>27</sup> (Carinci <i>et al.</i> , 2015) <sup>28</sup> | Definition not included                                                                                                                                                                                           |
| (Dreesen <i>et al.</i> , 2014) <sup>30</sup>                                                                                                                                                                                                                                                                                                                                                                                                                               | A quality indicator as a measurable element of practice performance for which there is evidence or consensus that it can be used to assess the quality of care, and hence change the care provided. <sup>37</sup> |
| (Ouwens <i>et al.</i> , 2010) <sup>31</sup> (Uphoff <i>et al.</i> , 2012) <sup>33</sup>                                                                                                                                                                                                                                                                                                                                                                                    | Quality indicators are ‘measurable elements of practice performance for which there is evidence or consensus that they can be used to assess the quality of care’ <sup>38</sup>                                   |

|                                             |                                                                                                                                                                                                                            |
|---------------------------------------------|----------------------------------------------------------------------------------------------------------------------------------------------------------------------------------------------------------------------------|
| (Davies <i>et al.</i> , 2009) <sup>23</sup> | An explicit measurable statement of the quality of care given. Relates to a single outcome or process of medical care. Clearly defined and unambiguous. <sup>38 39</sup>                                                   |
| (NHS, 2003) <sup>22</sup>                   | Items that patients, caregivers and professionals believed were important in achieving the benchmarks of best practice. <sup>22</sup>                                                                                      |
| (IAPO, 2012) <sup>21</sup>                  | Can be measures of structure, process and outcome, either as generic measures relevant for all diseases, or disease-specific measures that describe quality of patient care related to a specific diagnosis. <sup>40</sup> |

OECD, Organization for Economic Cooperation and Development

NHS, National Health Services

IAPO, International Alliance of Patients' Organizations

## DISCUSSION

This review specifically examined existing PC-QIs in the academic and grey literature. Patient-centred care has been increasingly adopted by many jurisdictions, however this review revealed there to be gaps in the conceptualization of PC-QIs. Out of the 17 articles that met the inclusion criteria, only 9 were peer reviewed, and looked at specific conditions. Additionally, the heterogeneity of the PCC literature relates to the variety of definitions on PC-QIs, and a diverse type of indicators developed for different patient population and care-settings. For instance, all included articles in the review used the term 'indicator,' but not all presented actual indicators as defined by the Agency for Healthcare Research & Quality (AHRQ).<sup>16</sup>

The absence of a standard definition of what a PC-QI is in the literature has posed challenges in identifying the literature sources for inclusion in this review. 'Quality' means different things to different people, and despite the standard definition of PCC by the Institute of Medicine,<sup>1</sup> PCC continues to be operationalized and measured differently.<sup>41</sup> Most sources identified in the literature did not explicitly define what a quality indicator is, which may explain the differences in approaches to indicator development. The absence of a definition for quality indicators results in inconsistencies for how an indicator should be presented and also what makes for a good indicator. Previous reviews have also found variability in quality indicator definitions, such as indicators for hip fracture patient care.<sup>42</sup> The absence of a standard definition of PC-QIs poses concerns for standardized measurement of PCC, and for implementation of PC-QIs in healthcare settings.

In compliance with quality improvement agencies, quality councils and organizations such as the AHRQ, quality indicators should be presented as a unit of measurement - as a percentage or proportion.<sup>16</sup> Our review revealed inconsistencies in the definition of indicators. Only few sources in the non-peer reviewed literature included PC-QIs as quantifiable units, such as percentages, incorporating a numerator and denominator in the

1  
2  
3 unit of measurement.<sup>43</sup> Most of the identified indicators were actually domains included  
4 in PCC measures and guidelines. The lack of defined units of measurement impedes  
5 comparisons across facilities, and benchmarking, and doesn't allow for longitudinal  
6 evaluation and overall measurement of care that is patient-centred. Without this unit of  
7 measurement for PC-QIs, it is difficult to target specific improvements needed for PCC.  
8  
9

10 The review revealed that when incorporating the patient and caregiver perspective in  
11 quality improvement, a difficulty exists in translating perceptions and subjective  
12 experiences into standardized objective indicators. Measures of well-being are both  
13 necessary and important to incorporating a PCC model of care. The study by Carr *et al.*  
14 suggests that perceptions of health and its meaning vary between individuals and across  
15 time, as do their experiences and expectations of healthcare.<sup>44</sup> In order to capture various  
16 perspectives on quality care, it is vital to include patients and families. Including the  
17 patient and family perspective is necessary to ensure quality patient-centred care.  
18  
19

20 Additionally, this review found large variances for domains to categorize approaches to  
21 measuring PCC. In an attempt to organize our findings and understand the ways of  
22 measuring PCC, we used a previously published person-centered care framework<sup>18</sup> to  
23 classify them into healthcare quality domains. From this classification, most strategies for  
24 measuring PCC were found to relate to domains associated with healthcare processes  
25 (e.g. cultivating communication). These findings are consistent with the current  
26 measurement landscape, for instance trauma indicators,<sup>45</sup> and AHRQ PC-QIs<sup>46</sup> which  
27 mainly assess processes and outcomes. For PCC, structures, such as policies and  
28 education programs can provide an important basis to improve PCC practice.<sup>18 47</sup>  
29 Structure indicators provide the necessary foundations for the assessment of process and  
30 outcome indicators, for instance through creating a PCC culture, supporting the  
31 workforce to deliver PCC, and providing an accommodating environment for patients.<sup>18</sup>  
32 In this review, structure indicators were lacking.  
33  
34  
35

36 Finally, there is scarce evidence in the literature on how to implement indicators for PCC,  
37 and how to evaluate their implementation. PCC measurement has, to date, primarily  
38 focused on specific disease conditions and healthcare sectors. However, recent initiatives,  
39 (National Health Services) reveal a more generic approach to measurement (Family and  
40 Friend Test).<sup>48</sup> In order to create a standardized set of PC-QIs, indicators must be  
41 developed across the continuum of care. Santana & Stelfox. also found a lack of  
42 implementation of indicators in care settings in their review.<sup>45</sup> Before indicators are  
43 implemented, they must be evaluated according to standard set criteria. What constitutes  
44 as a good indicator has been outlined by health quality organizations, such as National  
45 Quality Forum. As outlined by the National Quality Forum, quality indicators should be  
46 evaluated through a set criterion including: importance, scientific acceptability,  
47 feasibility, and usability and use.<sup>49</sup> Our review did not identify any studies where such  
48 evaluations were implemented. In the development and implementation of quality  
49 indicators, the guideline set by the National Quality Forum should be adhered to.  
50  
51  
52  
53

54 The gaps identified in the literature for patient-centred quality indicators provide  
55 directions for future research. First, there needs to be consensus on a standard definition  
56  
57  
58  
59  
60

1  
2  
3 of patient-centred quality indicator to guide future measurement of patient-centred care.  
4 Second, there is a need to develop a standard set of PC-QIs that could be implemented in  
5 various healthcare settings. Third, PC-QIs need to be evaluated according to a set criteria.  
6 Lastly, PC-QIs need to be implemented across healthcare settings for monitoring and  
7 evaluation of PCC.  
8  
9

### 10 **Strengths and Limitations**

11  
12 Our scoping review used robust and transparent methods guided by a protocol previously  
13 published,<sup>13</sup> and supported by a research librarian with expertise in knowledge synthesis  
14 and scoping reviews (DLL). We worked closely with our patient research partner (SZ) in  
15 the study design, research questions, search strategy and manuscript preparation.  
16

17 This review may not have identified all relevant sources in the published and grey  
18 literature as we conducted the search using only English terms. As we are following the  
19 scoping review methodology, the quality of the studies was not assessed.  
20  
21

### 22 **Conclusions**

23  
24 In summary, our review is the first to examine the literature pertaining to quality  
25 indicators that are patient-centric. Our findings will further the development of validated  
26 healthcare tools assessing healthcare quality from a patient-centred approach. Future  
27 research should focus on developing and refining PC-QIs that are ready to implement and  
28 evaluate following the criteria set forth by the National Quality Forum.<sup>49</sup>  
29  
30  
31  
32  
33  
34  
35  
36  
37  
38  
39  
40  
41  
42  
43  
44  
45  
46  
47  
48  
49  
50  
51  
52  
53  
54  
55  
56  
57  
58  
59  
60



1  
2  
3 **Acknowledgements:** We would like to acknowledge the contributions of Ms. Lisa  
4 Goodman, who provided support for the grey literature search for this scoping review.  
5  
6

7  
8 Data sharing: no additional data available  
9

10  
11 **Details of contributors:**

12 MJS conceived the study, and all authors identified key literature to be included in the  
13 review. MJS led the drafting of the manuscript and key discussion points with support  
14 from DL, RJJ, SA, ML and KM. SA managed the design of the tables (with feedback  
15 from all authors), and management of references. All authors provided important  
16 intellectual contribution and guidance throughout the development of the manuscript.  
17 HQ, DL, SZ, and ML provided guidance on the presentation of the findings and guidance  
18 on final revisions. All of the authors contributed to critical review and revisions to the  
19 manuscript, agreeing on the final version.  
20  
21

22  
23 **Funding:**

24 Dr. Santana secured funding from the M.S.I Foundation (Grant #886) based in Alberta,  
25 Canada. Dr. Lu acknowledges the support from the Alberta's Strategy for Patient  
26 Oriented Research (SPOR).  
27  
28

29 **Competing interests:** All authors have completed the ICMJE uniform disclosure form at  
30 [www.icmje.org/coi\\_disclosure.pdf](http://www.icmje.org/coi_disclosure.pdf) and declare: no support from any organisation for the  
31 submitted work; no financial relationships with any organisations that might have an  
32 interest in the submitted work in the previous three years; and no other relationships or  
33 activities that could appear to have influenced the submitted work  
34  
35

36 All authors had access to the data (literature identified and tables) in the study and  
37 assume responsibility for the integrity of the data and the accuracy of the data analysis.  
38

39 The lead author\* affirms that this manuscript is an honest, accurate, and transparent  
40 account of the study being reported; that no important aspects of the study have been  
41 omitted; and that any discrepancies from the study as planned (and, if relevant,  
42 registered) have been explained.  
43  
44

45 The Corresponding Author has the right to grant on behalf of all authors and does grant  
46 on behalf of all authors, a worldwide licence to the Publishers and its licensees in  
47 perpetuity, in all forms, formats and media (whether known now or created in the future),  
48 to i) publish, reproduce, distribute, display and store the Contribution, ii) translate the  
49 Contribution into other languages, create adaptations, reprints, include within collections  
50 and create summaries, extracts and/or, abstracts of the Contribution, iii) create any other  
51 derivative work(s) based on the Contribution, iv) to exploit all subsidiary rights in the  
52 Contribution, v) the inclusion of electronic links from the Contribution to third party  
53 material where-ever it may be located; and, vi) licence any third party to do any or all of  
54 the above.  
55  
56  
57  
58  
59

## References

1. Institute of Medicine. Crossing the quality chasm: a new health system for the 21st century. *National Academy Press* 2001.
2. Doyle C, Lennox L, Bell D. A systematic review of evidence on the links between patient experience and clinical safety and effectiveness. *BMJ open* 2013;**3**(1):e001570.
3. Oates J, Weston WW, Jordan J. The impact of patient-centered care on outcomes. *Fam Pract* 2000;**49**:796-804.
4. Fung CH, Lim Y-W, Mattke S, et al. Systematic Review: The Evidence That Publishing Patient Care Performance Data Improves Quality of Care The Impact of Publishing Performance Data on Quality of Care. *Annals of internal medicine* 2008;**148**(2):111-23.
5. Epstein RM, Fiscella K, Lesser CS, et al. Why the nation needs a policy push on patient-centered health care. *Health affairs* 2010;**29**(8):1489-95.
6. Bertakis KD, Azari R. Patient-centered care is associated with decreased health care utilization. *The Journal of the American Board of Family Medicine* 2011;**24**(3):229-39.
7. Delaney LJ. Patient-centred care as an approach to improving health care in Australia. *Collegian* 2017.
8. Fix GM, VanDeusen Lukas C, Bolton RE, et al. Patient - centred care is a way of doing things: How healthcare employees conceptualize patient - centred care. *Health Expectations* 2018;**21**(1):300-7.
9. Dwamena F, Holmes-Rovner M, Gaulden CM, et al. Interventions for providers to promote a patient-centred approach in clinical consultations. *Cochrane Database Syst Rev* 2012;**12**(1).
10. Braithwaite J, Hibbert P, Blakely B, et al. Health system frameworks and performance indicators in eight countries: A comparative international analysis. *SAGE Open Medicine* 2017;**5**:2050312116686516.
11. Quality Indicator Measure Development, Implementation, Maintenance, and Retirement Rockville, MD: Agency for Healthcare Research and Quality: Center for Health Policy Center for Primary Care and Outcomes Research & Battelle Memorial Institute 2011.
12. Hughes RG. Tools and strategies for quality improvement and patient safety 2008.
13. Jolley RJ, Lorenzetti DL, Manalili K, et al. Protocol for a scoping review study to identify and classify patient-centred quality indicators. *BMJ open* 2017;**7**(1):e013632.
14. Arksey H, O'Malley L. Scoping studies: towards a methodological framework. *International journal of social research methodology* 2005;**8**(1):19-32.
15. Levac D, Colquhoun H, O'Brien KK. Scoping studies: advancing the methodology. *Implementation Science* 2010;**5**(1):69.
16. Agency for Healthcare Research and Quality. Quality Improvement and monitoring at your fingertips. Secondary Quality Improvement and monitoring at your fingertips. <https://www.qualityindicators.ahrq.gov/> (accessed 01 Oct 2017).
17. Synthesis. Secondary Synthesis 2016. <http://synthesis.info/> (accessed 01 Oct 2017).
18. Santana MJ, Manalili K, Jolley RJ, et al. How to practice person-centred care: A conceptual framework. *Health Expectations* 2017.

19. Donabedian A. The definition of quality and approaches to its assessment. Explorations in quality assessment and monitoring 1980.
20. Wensing M, Grol R, van Montfort P, et al. Indicators of the quality of general practice care of patients with chronic illness: a step towards the real involvement of patients in the assessment of the quality of care. *Quality and Safety in Health Care* 1996;**5**(2):73-80.
21. International Alliance of Patients' Organizations (IAPO). Patient-Centred Healthcare Indicators Review 2012.
22. NHS. Essence of Care Patient-focused benchmarks for clinical governance 2003.
23. Davies P, Wye L, Horrocks S, et al. Developing quality indicators for community services: the case of district nursing. *Quality in primary care* 2011;**19**(3):155.
24. Kelley E, Hurst J. Health care quality indicators project 2006.
25. Registered Nurses Association of Ontario. Client Centred Care. Toronto, Ontario 2002.
26. Lewis S. Patient-centered care: an introduction to what it is and how to achieve it. Saskatchewan Ministry of Health 2009.
27. OECD. Health Care Quality Indicators - Responsiveness and Patient Experiences. Secondary Health Care Quality Indicators - Responsiveness and Patient Experiences 2006. <http://www.oecd.org/els/health-systems/hcqi-responsiveness-and-patient-experiences.htm> (accessed 01 Oct 2017).
28. Carinci F, Van Gool K, Mainz J, et al. Towards actionable international comparisons of health system performance: expert revision of the OECD framework and quality indicators. *International Journal for Quality in Health Care* 2015;**27**(2):137-46.
29. den Breejen E, Nelen W, Schol S, et al. Development of guideline-based indicators for patient-centredness in fertility care: what patients add. *Human reproduction* 2013;**28**(4):987-96.
30. Dreesen M, Foulon V, Vanhaecht K, et al. Identifying patient-centered quality indicators for the care of adult home parenteral nutrition (HPN) patients. *Journal of Parenteral and Enteral Nutrition* 2014;**38**(7):840-46.
31. Ouwens M, Hermens R, Hulscher M, et al. Development of indicators for patient-centred cancer care. *Supportive Care in cancer* 2010;**18**(1):121.
32. Sewitch MJ, Dubé C, Brien S, et al. Patient-identified quality indicators for colonoscopy services. *Canadian Journal of Gastroenterology and Hepatology* 2013;**27**(1):25-32.
33. Uphoff EP, Wennekes L, Punt CJ, et al. Development of generic quality indicators for patient-centered cancer care by using a RAND modified Delphi method. *Cancer nursing* 2012;**35**(1):29-37.
34. Zimmerman S, Love K, Cohen LW, et al. Person-Centeredness in Home-and Community-Based Services and Supports: Domains, Attributes, and Assisted Living Indicators. *Clinical Gerontologist* 2014;**37**(5):429-45.
35. Cox J, Gray A. NHS at the hustings: four quality indicators for a person centred medicine. *European Journal for Person Centered Healthcare* 2015;**3**(1):1-3.
36. Silow-Carroll S, Alteras T, Stepnick L. Patient-centered Care for Underserved Populations: Ddefinition and Best Practices: Economic and Social Research Institute Washington, DC 2006.

- 1
- 2
- 3
- 4 37. Lawrence M, Olesen F. Indicators of quality in health care. *The European Journal of*
- 5 *General Practice* 1997;**3**(3):103-08.
- 6
- 7 38. Campbell S, Braspenning J, Hutchinson A, et al. Research methods used in
- 8 developing and applying quality indicators in primary care. *Qual Saf Health Care*
- 9 2002;**11**(4):358-64.
- 10
- 11 39. Pencheon D. The good indicators guide: understanding how to use and choose
- 12 indicators: NHS Institute for Innovation and Improvement 2008.
- 13
- 14 40. Mainz J. Defining and classifying clinical indicators for quality improvement.
- 15 *International Journal for Quality in Health Care* 2003;**15**(6):523-30.
- 16
- 17 41. Epstein RM, Franks P, Fiscella K, et al. Measuring patient-centered communication
- 18 in patient-physician consultations: theoretical and practical issues. *Social science*
- 19 *& medicine* 2005;**61**(7):1516-28.
- 20
- 21 42. Pitzul KB, Munce SE, Perrier L, et al. Scoping review of potential quality indicators
- 22 for hip fracture patient care. *BMJ open* 2017;**7**(3):e014769.
- 23
- 24 43. Hermann RC, Mattke S, Somekh D, et al. Quality indicators for international
- 25 benchmarking of mental health care. *International Journal for Quality in Health*
- 26 *Care* 2006;**18**(suppl\_1):31-38.
- 27
- 28 44. Carr AJ, Gibson B, Robinson PG. Measuring quality of life: Is quality of life
- 29 determined by expectations or experience? *BMJ: British Medical Journal*
- 30 2001;**322**(7296):1240.
- 31
- 32 45. Santana MJ, Stelfox HT. Quality indicators used by trauma centers for performance
- 33 measurement. *Journal of Trauma and Acute Care Surgery* 2012;**72**(5):1298-303.
- 34
- 35 46. Agency for Healthcare Research and Quality. Pediatric Quality Indicators Overview.
- 36 Secondary Pediatric Quality Indicators Overview.
- 37 [https://www.qualityindicators.ahrq.gov/modules/pdi\\_resources.aspx](https://www.qualityindicators.ahrq.gov/modules/pdi_resources.aspx) (accessed 01
- 38 Oct 2017).
- 39
- 40 47. The Lewin Group. Indicators of Cultural Competence in Health Care Delivery
- 41 Organizations: An Organizational Cultural Competence Assessment Profile 2002.
- 42
- 43 48. National Health Services UK. Friends and Family Test.
- 44 <https://www.england.nhs.uk/fft/> (accessed 20 December 2017).
- 45
- 46 49. National Quality Forum. Measure Evaluation Criteria. Secondary Measure Evaluation
- 47 Criteria.
- 48 [http://www.qualityforum.org/Measuring\\_Performance/Submitting\\_Standards/Mea](http://www.qualityforum.org/Measuring_Performance/Submitting_Standards/Measure_Evaluation_Criteria.aspx)
- 49 [sure\\_Evaluation\\_Criteria.aspx](http://www.qualityforum.org/Measuring_Performance/Submitting_Standards/Measure_Evaluation_Criteria.aspx) (accessed 01 Oct 2017).
- 50
- 51
- 52
- 53
- 54
- 55
- 56
- 57
- 58
- 59
- 60

1  
2  
3  
4  
5  
6  
7  
8  
9  
10  
11  
12  
13  
14  
15  
16  
17  
18  
19  
20  
21  
22  
23  
24  
25  
26  
27  
28  
29  
30  
31  
32  
33  
34  
35  
36  
37  
38  
39  
40  
41  
42  
43  
44  
45  
46  
47  
48  
49  
50  
51  
52  
53  
54  
55  
56  
57  
58  
59  
60

Figure 1. Flow Diagram for study inclusion

For peer review only

Figure 1- Flow Diagram for study inclusion

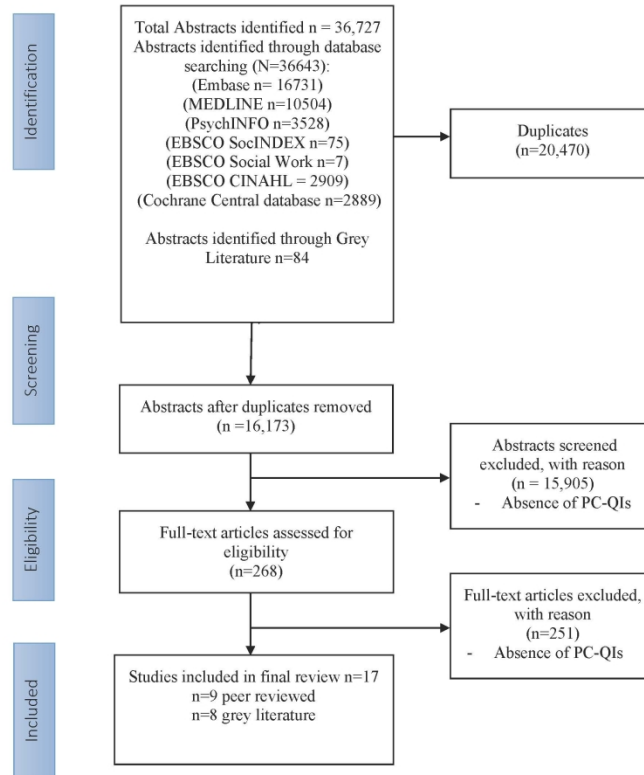

215x279mm (300 x 300 DPI)

## Patient Centered Quality Indicators Search Strategies

### MEDLINE

1. exp patient-centered care/
2. Culturally Competent Care/ or exp ethnic groups/
3. ((carer\* or care giver\* or caregiver\* or client\* or culture\* or cultural\* or ethnic\* or family or families or indigenous or parents or patient\* or person or racial\* or ethnocultural\* or immigrant\* or refugee\* or migrant\*) adj5 (centered\* or centred\* or focused) adj5 (care or healthcare or nursing or medical or medicine)).tw.kw.kf
4. cultural competency/ or patient satisfaction/ or patient preference/
5. exp Patient Rights/
6. ((carer\* or care giver\* or caregiver\* or client\* or cultural\* or culture\* or ethnic\* or family or families or indigenous or parents or patient\* or racial\* or ethnocultural\* or immigrant\* or refugee\* or migrant\*) adj5 (advocacy or autonomy or beliefs or choice or perspectives or preferences or rights or satisfaction or values or views) adj5 (care or healthcare or nursing or medical or medicine)).tw.
7. ((cultural\* or ethnic\* or racial\* or ethnocultural\* or immigrant\* or refugee\* or migrant\*) adj10 (competency or competent care)).tw.
8. 1 or 2 or 3 or 4 or 5 or 6 or 7 or 8
9. exp Quality Indicators, Health Care/
10. benchmarking/ or clinical audit/
11. (performance measure\* or (healthcare adj3 monitor\*) or performance reporting or QI or PQI or (quality adj3 criteria) or (quality adj3 indicator\*) or (quality adj3 measure\*) or (quality adj3 scale\*)).tw,kw.
12. Guideline Adherence/
13. 10 or 11 or 12 or 13
14. 9 and 14



1  
2  
3  
4  
5  
6  
7  
8  
9  
10  
11  
12  
13  
14  
15  
16  
17  
18  
19  
20  
21  
22  
23  
24  
25  
26  
27  
28  
29  
30  
31  
32  
33  
34  
35  
36  
37  
38  
39  
40  
41  
42  
43  
44  
45  
46  
47  
48  
49  
50  
51  
52  
53  
54  
55  
56  
57  
58  
59  
60

15. limit 15 to yr="1990 -Current"

16. limit 16 to yr="2015 -Current"

For peer review only

## CINAHL (EBSCO)- Patient Centered Quality Indicators Search Strategies

1. (MH "Patient Centered Care") OR (MH "Gender Specific Care") OR (MH "Transcultural Care") OR (MH "Cultural Competence") OR (MH "Transcultural Nursing") OR (MH "Family Centered Care") OR (MH "Patient Satisfaction") OR (MH "Patient Rights+") OR (MH "Patient Advocacy")
2. TI ( ((carer\* or care giver\* or caregiver\* or culture\* or cultural\* or family or families or parents or patient\* or person) N5 (centered\* or centred\* or focused) N5 (care or healthcare or nursing or medical or medicine)) ) OR AB ( ((carer\* or care giver\* or caregiver\* or culture\* or cultural\* or family or families or parents or patient\* or person) N5 (centered\* or centred\* or focused) N5 (care or healthcare or nursing or medical or medicine)) )
3. TI ( ((carer\* or care giver\* or caregiver\* or cultural\* or culture\* or family or families or parents or patient\*) N5 (advocacy or autonomy or beliefs or choice or perspectives or preferences or rights or satisfaction or values or views) N5 (care or healthcare or nursing or medical or medicine)) ) OR AB ( ((carer\* or care giver\* or caregiver\* or cultural\* or culture\* or family or families or parents or patient\*) N5 (advocacy or autonomy or beliefs or choice or perspectives or preferences or rights or satisfaction or values or views) N5 (care or healthcare or nursing or medical or medicine)) )
4. TI ( (cultural competency or culturally competent care) ) OR AB ( (cultural competency or culturally competent care) )
5. 1 or 2 or 3 or 4
6. (MH "Clinical Indicators") OR (MH "Benchmarking") OR (MH "Clinical Governance") OR (MH "Guideline Adherence") OR (MH "Performance Measurement Systems") OR (MH "Quality Assessment") OR (MH "Quality Patient Care Scale") ) OR TI ( (performance measure\* or (healthcare N3 monitor\*) or performance reporting or QI or PQI or (quality N3 criteria) or (quality N3 indicator\*) or (quality N3 measure\*) or (quality N3 scale\*)) ) OR AB ( (performance measure\* or (healthcare N3 monitor\*) or performance reporting or QI or PQI or (quality N3 criteria) or (quality N3 indicator\*) or (quality N3 measure\*) or (quality N3 scale\*)) )
7. 5 and 6

1  
2  
3  
4  
5  
6  
7  
8  
9  
10  
11  
12  
13  
14  
15  
16  
17  
18  
19  
20  
21  
22  
23  
24  
25  
26  
27  
28  
29  
30  
31  
32  
33  
34  
35  
36  
37  
38  
39  
40  
41  
42  
43  
44

| Section                                               | Item | PRISMA-ScR Checklist Item                                                                                                                                                                                                                                                                                                  |
|-------------------------------------------------------|------|----------------------------------------------------------------------------------------------------------------------------------------------------------------------------------------------------------------------------------------------------------------------------------------------------------------------------|
| <b>Title</b>                                          |      | Identify the report as a scoping review. <b>Title Page</b>                                                                                                                                                                                                                                                                 |
| <b>Abstract</b>                                       |      |                                                                                                                                                                                                                                                                                                                            |
| Structured summary                                    |      | Provide a structured summary that includes (as applicable) background, objectives, eligibility criteria, sources of evidence, charting methods, results, and conclusions that relate to the review questions and objectives. <b>Done</b>                                                                                   |
| <b>Introduction</b>                                   |      |                                                                                                                                                                                                                                                                                                                            |
| Rationale                                             |      | Describe the rationale for the review in the context of what is already known. Explain why the review questions/objectives lend themselves to a scoping review approach. <b>Page 4</b>                                                                                                                                     |
| Objectives                                            |      | Provide an explicit statement of the questions and objectives being addressed with reference to their key elements (e.g., population or participants, concepts, and context) or other relevant key elements used to conceptualize the review questions and/or objectives. <b>Page 4</b>                                    |
| <b>Methods</b>                                        |      |                                                                                                                                                                                                                                                                                                                            |
| Protocol and registration                             |      | Indicate whether a review protocol exists; state if and where it can be accessed (e.g., a Web address); and if available, provide registration information, including the registration number. <b>Page 4</b>                                                                                                               |
| Eligibility criteria                                  |      | Specify characteristics of the sources of evidence used as eligibility criteria (e.g., years considered, language, and publication status), and provide a rationale. <b>Page 5</b>                                                                                                                                         |
| Information sources*                                  |      | Describe all information sources in the search (e.g., databases with dates of coverage and contact with authors to identify additional sources), as well as the date the most recent search was executed. <b>Page 5</b>                                                                                                    |
| Search                                                |      | Present the full electronic search strategy for at least 1 database, including any limits used, such that it could be repeated. <b>Appendix</b>                                                                                                                                                                            |
| Selection of sources of evidence†                     | 9    | State the process for selecting sources of evidence (i.e., screening and eligibility) included in the scoping review. <b>Page 5-6</b>                                                                                                                                                                                      |
| Data charting process‡                                | 10   | Describe the methods of charting data from the included sources of evidence (e.g., calibrated forms or forms that have been tested by the team before their use, and whether data charting was done independently or in duplicate) and any processes for obtaining and confirming data from investigators. <b>Page 5-6</b> |
| Data items                                            | 11   | List and define all variables for which data were sought and any assumptions and simplifications made. <b>Page 5</b>                                                                                                                                                                                                       |
| Critical appraisal of individual sources of evidence§ | 12   | If done, provide a rationale for conducting a critical appraisal of included sources of evidence; describe the methods used and how this information was used in any data synthesis (if appropriate).                                                                                                                      |
| Summary measures                                      | 13   | Not applicable for scoping reviews.                                                                                                                                                                                                                                                                                        |
| Synthesis of results                                  | 14   | Describe the methods of handling and summarizing the data that were charted. <b>Page 5</b>                                                                                                                                                                                                                                 |
| Risk of bias across studies                           | 15   | Not applicable for scoping reviews.                                                                                                                                                                                                                                                                                        |
| Additional analyses                                   | 16   | Not applicable for scoping reviews.                                                                                                                                                                                                                                                                                        |
| <b>Results</b>                                        |      |                                                                                                                                                                                                                                                                                                                            |
| Selection of sources of evidence                      | 17   | Give numbers of sources of evidence screened, assessed for eligibility, and included in the review, with reasons for exclusions at each stage, ideally using a flow diagram. <b>Figure 1</b>                                                                                                                               |
| Characteristics of sources of evidence                | 18   | For each source of evidence, present characteristics for which data were charted and provide the citations. <b>Page 7-8</b>                                                                                                                                                                                                |
| Critical appraisal within sources of evidence         | 19   | If done, present data on critical appraisal of included sources of evidence (see item 12).                                                                                                                                                                                                                                 |
| Results of individual sources of evidence             | 20   | For each included source of evidence, present the relevant data that were charted that relate to the review questions and objectives. <b>Page 9-11</b>                                                                                                                                                                     |
| Synthesis of results                                  | 21   | Summarize and/or present the charting results as they relate to the review questions and objectives.                                                                                                                                                                                                                       |
| Risk of bias across studies                           | 22   | Not applicable for scoping reviews. <b>Page 9-11</b>                                                                                                                                                                                                                                                                       |
| Additional analyses                                   | 23   | Not applicable for scoping reviews.                                                                                                                                                                                                                                                                                        |
| <b>Discussion</b>                                     |      |                                                                                                                                                                                                                                                                                                                            |
| Summary of evidence                                   | 24   | Summarize the main results (including an overview of concepts, themes, and types of evidence available), link to the review questions and objectives, and consider the relevance to key groups.                                                                                                                            |
| Limitations                                           | 25   | Discuss the limitations of the scoping review process. <b>Page 15</b>                                                                                                                                                                                                                                                      |
| Conclusions                                           | 26   | Provide a general interpretation of the results with respect to the review questions and objectives, as well as potential implications and/or next steps. <b>Page 15</b>                                                                                                                                                   |
| <b>Funding</b>                                        | 27   | Describe sources of funding for the included sources of evidence, as well as sources of funding for the scoping review. Describe the role of the funders of the scoping review. <b>Page 16</b>                                                                                                                             |

JBI = Joanna Briggs Institute; PRISMA-ScR = Preferred Reporting Items for Systematic reviews and Meta-Analyses extension for Scoping Reviews.

\* Where sources of evidence (see second footnote) are compiled from, such as bibliographic databases, social media platforms, and Web sites.

† A more inclusive/heterogeneous term used to account for the different types of evidence or data sources (e.g., quantitative and/or qualitative research, expert opinion, and policy documents) that may be eligible in a scoping review as opposed to only studies. This is not to be confused with information sources (see first footnote).

‡ The frameworks by Arksey and O'Malley (6) and Levac and colleagues (7) and the JBI guidance (4, 5) refer to the process of data extraction in a scoping review as data charting.

§ The process of systematically examining research evidence to assess its validity, results, and relevance before using it to inform a decision. This term is used for items 12 and 19 instead of "risk of bias" (which is more applicable to systematic reviews of interventions) to include and acknowledge the various sources of evidence that may be used in a scoping review (e.g., quantitative and/or qualitative research, expert opinion, and policy documents).
