# Supplementary material for: Measuring patient-centred system performance: a scoping review of patient-centred care quality indicators
Source: PubMed Central journal article supplement — BMJ Open. 2019 Jan 7;9(1):e023596. doi: 10.1136/bmjopen-2018-023596 (PMC6326310; doi:10.1136/bmjopen-2018-023596), 2019-01-07
Supplement: bmjopen-2018-023596supp001.pdf [file bmjopen-2018-023596supp001.pdf]

## **CINAHL (EBSCO)- Patient Centered Quality Indicators Search Strategies**

1. (MH "Patient Centered Care") OR (MH "Gender Specific Care") OR (MH "Transcultural Care") OR (MH "Cultural Competence") OR (MH "Transcultural Nursing") OR (MH "Family Centered Care") OR (MH "Patient Satisfaction") OR (MH "Patient Rights+") OR (MH "Patient Advocacy")
2. TI ( ((carer\* or care giver\* or caregiver\* or culture\* or cultural\* or family or families or parents or patient\* or person) N5 (centered\* or centred\* or focused) N5 (care or healthcare or nursing or medical or medicine)) ) OR AB ( ((carer\* or care giver\* or caregiver\* or culture\* or cultural\* or family or families or parents or patient\* or person) N5 (centered\* or centred\* or focused) N5 (care or healthcare or nursing or medical or medicine)) )
3. TI ( ((carer\* or care giver\* or caregiver\* or cultural\* or culture\* or family or families or parents or patient\*) N5 (advocacy or autonomy or beliefs or choice or perspectives or preferences or rights or satisfaction or values or views) N5 (care or healthcare or nursing or medical or medicine)) ) OR AB ( ((carer\* or care giver\* or caregiver\* or cultural\* or culture\* or family or families or parents or patient\*) N5 (advocacy or autonomy or beliefs or choice or perspectives or preferences or rights or satisfaction or values or views) N5 (care or healthcare or nursing or medical or medicine)) )
4. TI ( (cultural competency or culturally competent care) ) OR AB ( (cultural competency or culturally competent care) )
5. 1 or 2 or 3 or 4
6. (MH "Clinical Indicators") OR (MH "Benchmarking") OR (MH "Clinical Governance") OR (MH "Guideline Adherence") OR (MH "Performance Measurement Systems") OR (MH "Quality Assessment") OR (MH "Quality Patient Care Scale") ) OR TI ( (performance measure\* or (healthcare N3 monitor\*) or performance reporting or QI or PQI or (quality N3 criteria) or (quality N3 indicator\*) or (quality N3 measure\*) or (quality N3 scale\*)) ) OR AB ( (performance measure\* or (healthcare N3 monitor\*) or performance reporting or QI or PQI or (quality N3 criteria) or (quality N3 indicator\*) or (quality N3 measure\*) or (quality N3 scale\*)) )
7. 5 and 6
