# Supplementary material for: Measuring patient-centred system performance: a scoping review of patient-centred care quality indicators
Source: PubMed Central journal article supplement — BMJ Open. 2019 Jan 7;9(1):e023596. doi: 10.1136/bmjopen-2018-023596 (PMC6326310; doi:10.1136/bmjopen-2018-023596), 2019-01-07
Supplement: bmjopen-2018-023596supp002.pdf [file bmjopen-2018-023596supp002.pdf]

## Patient Centered Quality Indicators Search Strategies

### MEDLINE

1. exp patient-centered care/
2. Culturally Competent Care/ or exp ethnic groups/
3. ((carer\* or care giver\* or caregiver\* or client\* or culture\* or cultural\* or ethnic\* or family or families or indigenous or parents or patient\* or person or racial\* or ethnocultural\* or immigrant\* or refugee\* or migrant\*) adj5 (centered\* or centred\* or focused) adj5 (care or healthcare or nursing or medical or medicine)).tw.kw.kf
4. cultural competency/ or patient satisfaction/ or patient preference/
5. exp Patient Rights/
6. ((carer\* or care giver\* or caregiver\* or client\* or cultural\* or culture\* or ethnic\* or family or families or indigenous or parents or patient\* or racial\* or ethnocultural\* or immigrant\* or refugee\* or migrant\*) adj5 (advocacy or autonomy or beliefs or choice or perspectives or preferences or rights or satisfaction or values or views) adj5 (care or healthcare or nursing or medical or medicine)).tw.
7. ((cultural\* or ethnic\* or racial\* or ethnocultural\* or immigrant\* or refugee\* or migrant\*) adj10 (competency or competent care)).tw.
8. 1 or 2 or 3 or 4 or 5 or 6 or 7 or 8
9. exp Quality Indicators, Health Care/
10. benchmarking/ or clinical audit/
11. (performance measure\* or (healthcare adj3 monitor\*) or performance reporting or QI or PQI or (quality adj3 criteria) or (quality adj3 indicator\*) or (quality adj3 measure\*) or (quality adj3 scale\*)).tw,kw.
12. Guideline Adherence/
13. 10 or 11 or 12 or 13
14. 9 and 14

15. limit 15 to yr="1990 -Current"

16. limit 16 to yr="2015 -Current"
